# Supplementary material for: Shank is a dose-dependent regulator of Cav1 calcium current and CREB target expression
Source: eLife. 2017 May 6;6:e18931. doi: 10.7554/eLife.18931 (PMC5432211; doi:10.7554/eLife.18931)
Supplement: Supplementary file 1. — DOI: http://dx.doi.org/10.7554/eLife.18931.013 [file elife-18931-supp1.xlsx]

## Sheet: Fig. 1
Panel C and E: WT							Panel D: WT							Panel F: Decay Tau
mV	pA/pF	S.E	N				mV	G/Gmax	S.E	N				Genotype	Tau (ms)	N	S.E	Significance vs WT	P value
-60	-0.215436	0.0884887	23				-60	0.00628688	0.00236981	23				WT	75.06	23	2.215
-50	-0.375131	0.195766	23				-50	0.0118244	0.00554701	23				shn-1(tm488)	78.65	21	4.543	ns	0.7991
-40	-0.312497	0.219279	23				-40	0.011855	0.00706199	23				Rescue	72.23	15	3.376	ns	0.4693
-30	-0.148654	0.0588394	23				-30	0.00710592	0.0024864	23
-20	-0.864711	0.160293	23				-20	0.0428337	0.00871993	23
-10	-4.52334	0.322582	23				-10	0.24575	0.0198518	23
0	-10.5188	0.381718	23				0	0.686434	0.0197034	23				P value Code
10	-11.4538	0.422955	23				10	0.959577	0.0099567	23				* = p ≤ 0.05
20	-8.21158	0.357099	23				20	0.996767	0.00313725	23				** = p ≤ 0.01
30	-4.32006	0.30405	23				30	1	0	23				*** = p ≤ 0.001
40	-1.14474	0.347685	23				40	1	0	23
Panel C and E: shn-1(tm488)							Panel D: shn-1(tm488)
mV	pA/pF	S.E	N	Significance vs WT	P value		mV	G/Gmax	S.E	N	Significance vs WT	P value
-60	-0.2013	0.0782609	21	ns	> 0.9999		-60	0.00685094	0.00273628	21	ns	> 0.9999
-50	-0.211882	0.0461087	21	ns	> 0.9999		-50	0.00760488	0.00196207	21	ns	> 0.9999
-40	-0.235289	0.0588427	21	ns	> 0.9999		-40	0.0109478	0.00356427	21	ns	> 0.9999
-30	-0.294402	0.0436832	21	ns	> 0.9999		-30	0.0139581	0.00246752	21	ns	> 0.9999
-20	-0.891693	0.0631266	21	ns	> 0.9999		-20	0.0461913	0.00370374	21	ns	> 0.9999
-10	-3.79048	0.259575	21	ns	0.7309		-10	0.238245	0.0155389	21	ns	> 0.9999
0	-8.63744	0.477631	21	***	0.0006		0	0.662569	0.018008	21	ns	0.6351
10	-9.2401	0.582906	21	****	< 0.0001		10	0.933014	0.0189483	21	ns	0.4777
20	-6.31707	0.46536	21	***	0.0005		20	0.979271	0.00934444	21	ns	0.9253
30	-2.97242	0.503797	21	*	0.0392		30	1	0	21	ns	> 0.9999
40	-0.0393049	0.604893	21	ns	0.1706		40	1	0	21	ns	> 0.9999
Panel E: Rescue
mV	pA/pF	S.E	N	Significance vs shn-1	P value
-60	-0.382062	0.178059	15	ns	> 0.9999
-50	-0.200523	0.0744812	15	ns	> 0.9999
-40	-0.165107	0.0622367	15	ns	> 0.9999
-30	-0.333464	0.0765966	15	ns	> 0.9999
-20	-1.31377	0.168455	15	ns	0.9991
-10	-5.47375	0.351293	15	*	0.0446
0	-11.3604	0.536461	15	****	< 0.0001
10	-11.711	0.679405	15	***	0.0003
20	-8.29056	0.56788	15	**	0.0087
30	-4.28674	0.586259	15	ns	0.2419
40	-1.07927	0.843985	15	ns	0.5783

## Sheet: Fig. 1 Sup 1
WT IKfast							WT IKfast							P value Code
mV	pA/pF	S.E	N				mV	G/Gmax	S.E	N				* = p ≤ 0.05
-60	1.05194	0.192276	9				-60	0.0874714	0.021938	9				** = p ≤ 0.01
-50	0.602485	0.0919925	9				-50	0.0368544	0.0095574	9				*** = p ≤ 0.001
-40	0.75287	0.178287	9				-40	0.0372836	0.0124878	9
-30	0.839713	0.26728	9				-30	0.0353869	0.0147263	9
-20	1.47697	0.358339	9				-20	0.0468637	0.0151221	9
-10	4.68688	0.778834	9				-10	0.114673	0.0216634	9
0	13.8343	1.89713	9				0	0.288121	0.0331905	9
10	27.3967	3.2606	9				10	0.501375	0.0385175	9
20	41.7143	4.40915	9				20	0.687288	0.0374982	9
30	55.0171	5.40244	9				30	0.825872	0.0322624	9
40	66.8007	6.26786	9				40	0.921551	0.0259932	9
50	75.2931	6.70339	9				50	0.962523	0.0144962	9
60	82.3528	6.94889	9				60	0.981536	0.00516135	9
WT IKslow							WT IKslow
mV	pA/pF	S.E	N				mV	G/Gmax	S.E	N
-60	0.787638	0.200583	9				-60	0.0931635	0.0244855	9
-50	-0.00867312	0.0497592	9				-50	-0.00145105	0.00402974	9
-40	-0.00515675	0.0613452	9				-40	0.000828831	0.00358209	9
-30	0.0693607	0.138132	9				-30	0.00494822	0.00818523	9
-20	0.772702	0.333005	9				-20	0.0311892	0.0151234	9
-10	3.02711	0.66703	9				-10	0.101088	0.0238136	9
0	8.34364	1.45816	9				0	0.239592	0.0317089	9
10	16.4525	2.40197	9				10	0.420671	0.0323428	9
20	25.9892	3.51245	9				20	0.600992	0.0339577	9
30	35.9719	4.80728	9				30	0.757403	0.033472	9
40	44.6444	5.87928	9				40	0.8629	0.0284952	9
50	51.3264	6.30426	9				50	0.921872	0.0187241	9
60	56.5039	5.96108	9				60	0.954398	0.0122587	9
shn-1(tm488) IKfast							shn-1(tm488) IKfast
mV	pA/pF	S.E	N	Significance vs WT	P value		mV	G/Gmax	S.E	N	Significance vs WT	P value
-60	0.451958	0.525715	14	ns	> 0.9999		-60	0.0499755	0.0345551	14	ns	0.9422
-50	0.460366	0.0808211	14	ns	> 0.9999		-50	0.0217886	0.00255832	14	ns	> 0.9999
-40	0.293868	0.0694243	14	ns	> 0.9999		-40	0.0100389	0.00235617	14	ns	0.9966
-30	0.136311	0.0933831	14	ns	> 0.9999		-30	0.00395209	0.00334596	14	ns	0.9867
-20	0.462484	0.136597	14	ns	> 0.9999		-20	0.0117523	0.00413002	14	ns	0.9654
-10	2.65225	0.301017	14	ns	> 0.9999		-10	0.0688213	0.0109494	14	ns	0.7874
0	9.63887	0.611006	14	ns	0.9991		0	0.215424	0.0176716	14	ns	0.1358
10	21.858	1.40301	14	ns	0.986		10	0.426393	0.0208212	14	ns	0.1091
20	35.3387	2.4334	14	ns	0.9542		20	0.616942	0.0225552	14	ns	0.1684
30	48.5125	3.40481	14	ns	0.9465		30	0.767727	0.0231242	14	ns	0.4347
40	60.3989	4.09281	14	ns	0.9527		40	0.878743	0.0213671	14	ns	0.857
50	69.9022	4.57995	14	ns	0.9891		50	0.941161	0.0174022	14	ns	0.9998
60	77.7235	5.08573	14	ns	0.9976		60	0.975622	0.0120935	14	ns	> 0.9999
shn-1(tm488) IKslow							shn-1(tm488) IKslow
mV	pA/pF	S.E	N	Significance vs WT	P value		mV	G/Gmax	S.E	N	Significance vs WT	P value
-60	0.360051	0.368321	14	ns	> 0.9999		-60	0.0387145	0.0288246	14	ns	0.6552
-50	0.00701211	0.02654	14	ns	> 0.9999		-50	0.000410984	0.00325347	14	ns	> 0.9999
-40	-0.0869529	0.0459406	14	ns	> 0.9999		-40	-0.0064813	0.00337968	14	ns	> 0.9999
-30	-0.217613	0.0709163	14	ns	> 0.9999		-30	-0.0112698	0.00441105	14	ns	> 0.9999
-20	0.0202114	0.127918	14	ns	> 0.9999		-20	-0.00227209	0.00619791	14	ns	0.9878
-10	1.07655	0.237334	14	ns	> 0.9999		-10	0.0371392	0.0089014	14	ns	0.3978
0	4.62167	0.45956	14	ns	0.9987		0	0.149132	0.0110322	14	ns	0.052
10	11.8789	1.18066	14	ns	0.9894		10	0.344562	0.0169365	14	ns	0.1617
20	20.1408	2.11449	14	ns	0.9202		20	0.533911	0.0286151	14	ns	0.3236
30	28.1414	2.73495	14	ns	0.6009		30	0.689056	0.0312286	14	ns	0.2961
40	35.6349	3.27507	14	ns	0.3741		40	0.809947	0.0330944	14	ns	0.6955
50	42.8833	3.63186	14	ns	0.479		50	0.898923	0.0235124	14	ns	0.9998
60	49.4967	4.40111	14	ns	0.7588		60	0.95729	0.0128256	14	ns	> 0.9999

## Sheet: Fig. 2
	Panels C and D: WT								P value Code
	mV	pA/pF	S.E	N					* = p ≤ 0.05
	-60	0.0332344	0.0781975	8					** = p ≤ 0.01
	-50	0.140263	0.0442767	8					*** = p ≤ 0.001
	-40	0.255394	0.0217175	8
	-30	0.117212	0.0689801	8
	-20	-0.322219	0.0527159	8
	-10	-3.90601	0.159815	8
	0	-10.7205	0.449789	8
	10	-12.1879	0.512494	8
	20	-8.91694	0.37637	8
	30	-4.65764	0.383868	8
	40	-0.781877	0.569219	8
	Panels C and D: egl-19(nu496)
	mV	pA/pF	S.E	N	Significance vs WT	P value
	-60	-0.288035	0.0726322	11	ns	> 0.9999
	-50	-0.313499	0.0851868	11	ns	0.999
	-40	-0.242534	0.0630498	11	ns	0.9976
	-30	-0.279821	0.0598204	11	ns	0.9997
	-20	-0.76603	0.106546	11	ns	0.9992
	-10	-3.2274	0.343604	11	ns	0.9708
	0	-7.38952	0.869377	11	****	< 0.0001
	10	-7.19477	0.769025	11	****	< 0.0001
	20	-4.73327	0.572926	11	****	< 0.0001
	30	-1.55894	0.564621	11	****	< 0.0001
	40	0.689033	0.556023	11	ns	0.1867
	Panel C: egl-19(nu495)
	mV	pA/pF	S.E	N	Significance vs WT	P value
	-60	-0.242142	0.0872694	10	ns	> 0.9999
	-50	-0.254273	0.0700514	10	ns	0.9998
	-40	-0.127776	0.0484847	10	ns	0.9999
	-30	-0.192467	0.0551657	10	ns	> 0.9999
	-20	-0.81057	0.121445	10	ns	0.9988
	-10	-3.53256	0.316759	10	ns	> 0.9999
	0	-8.15236	0.860709	10	**	0.0013
	10	-8.26065	0.998521	10	****	< 0.0001
	20	-5.77501	0.72749	10	****	< 0.0001
	30	-2.69806	0.592329	10	*	0.0335
	40	-0.457436	0.511219	10	ns	> 0.9999
	Panel E: shn-1(tm488)
	mV	pA/pF	S.E	N
	-60	-0.289812	0.187124	8
	-50	-0.223694	0.0722365	8
	-40	-0.382458	0.126889	8
	-30	-0.473677	0.0532112	8
	-20	-0.942715	0.0848082	8
	-10	-3.60189	0.390961	8
	0	-8.24287	0.704455	8
	10	-9.02817	0.762741	8
	20	-6.18442	0.75107	8
	30	-3.10001	0.875161	8
	40	-0.416729	1.01496	8
	Panels D and E: shn-1(tm488);egl-19(nu496)
	mV	pA/pF	S.E	N	Significance vs shn-1(tm488)	P value
	-60	-0.327489	0.121057	15	ns	> 0.9999
	-50	-0.218444	0.101008	15	ns	> 0.9999
	-40	-0.183962	0.0619782	15	ns	> 0.9999
	-30	-0.268153	0.0800706	15	ns	> 0.9999
	-20	-0.671678	0.109523	15	ns	> 0.9999
	-10	-3.2243	0.28287	15	ns	> 0.9999
	0	-7.55799	0.744573	15	ns	0.9925
	10	-7.61249	0.890255	15	ns	0.487
	20	-5.2405	0.665997	15	ns	0.9218
	30	-2.65988	0.442906	15	ns	0.9999
	40	-0.462923	0.319405	15	ns	> 0.9999

## Sheet: Fig 3
	Panel B: Gating Currents
	Genotype	pC/pF	N	S.E	Significance vs WT	P value
	WT	0.02575	12	0.001761
	shn-1(tm488)	0.01916	10	0.001132	**	0.007

## Sheet: Fig. 2 S1
								Panel B: WT							Panel A: Decay Tau
								mV	G/Gmax	S.E	N				Genotype	Tau (ms)	N	S.E	Significance vs WT	P value
								-60	-0.00061761	0.00207108	8				WT	74.16	8	5.196
								-50	-0.00358989	0.001231	8				egl-19(nu496)	83.68	11	7.52	ns	0.3378
								-40	-0.00761143	0.000604867	8
								-30	-0.00363968	0.00251408	8				Panel F: Decay Tau
								-20	0.0130618	0.00248074	8				Genotype	Tau (ms)	N	S.E	Significance vs WT	P value
								-10	0.184634	0.00982659	8				WT	75.52	15	2.416
								0	0.623963	0.0230568	8				shn-1(ok1241)	72.51	9	4.55	ns	0.5756
								10	0.9273	0.0214152	8
								20	0.990705	0.0089935	8
								30	1	0	8
								40	1	0	8				P value Code
															* = p ≤ 0.05
								Panel B: egl-19(nu496)							** = p ≤ 0.01
								mV	G/Gmax	S.E	N	Significance vs WT	P value		*** = p ≤ 0.001
								-60	0.00985367	0.00262037	10	ns	> 0.9999
								-50	0.0166899	0.00500671	10	ns	> 0.9999
								-40	0.0146029	0.00431516	10	ns	> 0.9999
								-30	0.0176546	0.00454992	10	ns	> 0.9999
								-20	0.048083	0.00688285	10	ns	0.9976
								-10	0.236689	0.0139369	10	ns	0.0579
								0	0.685549	0.0407305	10	ns	0.3289
								10	0.92516	0.0295017	10	ns	0.4373
								20	0.989351	0.0106488	10	ns	> 0.9999
								30	1	0	10	ns	> 0.9999
								40	1	0	10	ns	> 0.9999
	Panel C: WT							Panel E: WT
	mV	pA/pF	S.E	N				mV	G/Gmax	S.E	N
	-60	-0.348061	0.116724	15				-60	0.00996928	0.00309895	15
	-50	-0.650009	0.276232	15				-50	0.0200454	0.00773669	15
	-40	-0.615372	0.311278	15				-40	0.0222371	0.00989619	15
	-30	-0.290449	0.0542607	15				-30	0.0128369	0.0025428	15
	-20	-1.15404	0.20971	15				-20	0.0587121	0.0113929	15
	-10	-4.85259	0.470809	15				-10	0.278346	0.026564	15
	0	-10.4112	0.54292	15				0	0.719751	0.0237846	15
	10	-11.0623	0.57404	15				10	0.976792	0.00746435	15
	20	-7.83538	0.490331	15				20	1	0	15
	30	-4.14002	0.420477	15				30	1	0	15
	40	-1.33826	0.44405	15				40	1	0	15
	Panel C: shn-1(ok1241)							Panel E: shn-1(ok1241)
	mV	pA/pF	S.E	N	Significance vs WT	P value		mV	G/Gmax	S.E	N	Significance vs WT	P value
	-60	-0.191546	0.0916193	9	ns	> 0.9999		-60	0.00831584	0.00176638	9	ns	> 0.9999
	-50	-0.22911	0.0556648	9	ns	0.9997		-50	0.0137506	0.00623238	9	ns	> 0.9999
	-40	-0.121312	0.0555833	9	ns	0.9986		-40	0.0136927	0.00402109	9	ns	> 0.9999
	-30	-0.240726	0.0521075	9	ns	> 0.9999		-30	0.0143511	0.00310018	9	ns	> 0.9999
	-20	-0.814712	0.17568	9	ns	> 0.9999		-20	0.0415872	0.00513481	9	ns	> 0.9999
	-10	-3.39081	0.502651	9	ns	0.2514		-10	0.216157	0.0222856	9	ns	0.6487
	0	-7.04014	0.750406	9	****	< 0.0001		0	0.711279	0.0296113	9	ns	0.8438
	10	-6.9614	0.94308	9	****	< 0.0001		10	0.97922	0.0102904	9	ns	0.9641
	20	-4.56501	0.790449	9	****	< 0.0001		20	1	0	9	ns	> 0.9999
	30	-1.83751	0.62186	9	**	0.0055		30	1	0	9	ns	> 0.9999
	40	0.54704	0.586435	9	*	0.0454		40	1	0	9	ns	> 0.9999

## Sheet: Fig. 6
	Panel C: 0 copies of shn-1							Panel D: Decay Tau
	mV	pA/pF	S.E	N	Significance vs WT	P value		Genotype	Tau (ms)	N	S.E	Significance vs WT	P value
	-60	-0.154803	0.061569	12	ns	> 0.9999		0 copies of shn-1	77.89	12	5.78	ns	0.7878
	-50	-0.216235	0.0661631	12	ns	0.999		1 copy of shn-1	72.77	9	4.29	ns	0.5453
	-40	-0.145153	0.045449	12	ns	0.9979		2 copies of shn-1	75.48	15	2.29
	-30	-0.16783	0.0375749	12	ns	> 0.9999		4 copies of shn-1	81.59	8	5.92	ns	0.4787
	-20	-0.83954	0.0941495	12	ns	> 0.9999
	-10	-3.77881	0.356068	12	ns	0.5553		P value Code
	0	-8.56009	0.615591	12	*	0.0215		* = p ≤ 0.05
	10	-8.90125	0.754764	12	**	0.0035		** = p ≤ 0.01
	20	-6.00906	0.51825	12	*	0.0246		*** = p ≤ 0.001
	30	-2.49857	0.54438	12	ns	0.0638
	40	0.597978	0.720672	12	*	0.0133
	Panels A and C: 1 copy of shn-1
	mV	pA/pF	S.E	N	Significance vs WT	P value
	-60	-0.352802	0.0781164	9	ns	> 0.9999
	-50	-0.523396	0.217752	9	ns	> 0.9999
	-40	-0.474796	0.147574	9	ns	> 0.9999
	-30	-0.434782	0.108396	9	ns	> 0.9999
	-20	-1.07877	0.164399	9	ns	> 0.9999
	-10	-4.65625	0.425452	9	ns	> 0.9999
	0	-12.7761	0.573001	9	**	0.0035
	10	-14.042	0.958671	9	****	< 0.0001
	20	-10.2396	0.887738	9	**	0.0028
	30	-5.8415	0.618112	9	ns	0.0961
	40	-2.38839	0.499514	9	ns	0.7089
	Panels A, B, and C: 2 copies of shn-1
	mV	pA/pF	S.E	N
	-60	-0.348061	0.116724	15
	-50	-0.650009	0.276232	15
	-40	-0.615372	0.311278	15
	-30	-0.290449	0.0542607	15
	-20	-1.15404	0.20971	15
	-10	-4.85259	0.470809	15
	0	-10.4112	0.54292	15
	10	-11.0623	0.57404	15
	20	-7.83538	0.490331	15
	30	-4.14002	0.420477	15
	40	-1.33826	0.44405	15
	Panels B and C: 4 copies of shn-1
	mV	pA/pF	S.E	N	Significance vs WT	P value
	-60	-0.638532	0.230042	8	ns	> 0.9999
	-50	-0.777758	0.284472	8	ns	> 0.9999
	-40	-0.484031	0.234627	8	ns	> 0.9999
	-30	-0.489468	0.111324	8	ns	> 0.9999
	-20	-0.962331	0.0847645	8	ns	> 0.9999
	-10	-5.01417	0.552478	8	ns	> 0.9999
	0	-12.7817	0.80883	8	**	0.0044
	10	-13.599	0.819038	8	**	0.0017
	20	-9.78376	0.583287	8	*	0.0374
	30	-5.48163	0.510195	8	ns	0.3839
	40	-1.89355	0.7543	8	ns	0.9964

## Sheet: Fig. 7
	Panel C: Evoked Charge							P value Code
	Genotype	Mean (pC)	N	SE	Significance vs WT	P value		* = p ≤ 0.05
	WT	-9.686	11	0.8759				** = p ≤ 0.01
	shn-1(tm488)	-14.056	11	0.9946	**	0.0036		*** = p ≤ 0.001
	shn-1(tm488) Rescue	-9.991	12	1.257	ns	0.8465
	Panel D: Evoked Charge
	Genotype	Mean (pC)	N	SE	Significance vs WT	P value
	0 copies of shn-1	-14.056	11	0.9946	**	0.0037
	1 copy of shn-1	-12.777	10	1.455	ns	0.0998
	2 copies of shn-1	-10.443	20	0.6499
	4 copies of shn-1	-11.613	11	1.18	ns	0.3509
	Panel C: Evoked Amplitude
	Genotype	Mean (pA)	N	SE	Significance vs WT	P value
	WT	-1230	11	100.6
	shn-1(tm488)	-1640	11	139.5	0.0273	*
	shn-1(tm488) Rescue	-1453	12	126.6	0.3888	ns
	Panel D: Evoked Amplitude
	Genotype	Mean (pA)	N	SE	Significance vs WT	P value
	0 copies of shn-1	-1640	11	139.5	0.047	*
	1 copy of shn-1	-1771	10	218	0.0803	ns
	2 copies of shn-1	-1314	20	87.62
	4 copies of shn-1	-1453	11	126.6	0.2381	ns

## Sheet: Fig. 7 S1
	Panel B: mEPSC Amp
	Genotype	Mean (pA)	N	SE	Significance vs WT	P value
	WT	-20.88	19	0.9268
	shn-1(tm488)	-23.08	11	1.289	ns	0.1699
	shn-1(tm488) Rescue	-20.45	12	1.191	ns	0.7785
	Panel C: mEPSC Freq.
	Genotype	Mean (Hz)	N	SE	Significance vs WT	P value
	WT	38.73	18	2.994
	shn-1(tm488)	43.2	11	4.79	ns	0.4108
	shn-1(tm488) Rescue	33.76	12	3.935	ns	0.3159
	Panel D: mEPSC Amp
	Genotype	Mean (pA)	N	SE	Significance vs WT	P value
	0 copies of shn-1	-23.08	11	1.289	ns	0.2891
	1 copy of shn-1	-21.02	10	1.194	ns	0.8554
	2 copies of shn-1	-21.32	16	1.02
	4 copies of shn-1	-19.16	11	1.182	ns	0.1831
	Panel D: mEPSC Freq.
	Genotype	Mean (Hz)	N	SE	Significance vs WT	P value
	0 copies of shn-1	43.2	11	4.79	ns	0.2202
	1 copy of shn-1	33.56	10	3.683	ns	0.6981
	2 copies of shn-1	35.72	16	3.677
	4 copies of shn-1	34.08	11	3.356	ns	0.7578
