# Supplementary material for: Shank is a dose-dependent regulator of Cav1 calcium current and CREB target expression
Source: eLife. 2017 May 6;6:e18931. doi: 10.7554/eLife.18931 (PMC5432211; doi:10.7554/eLife.18931)
Supplement: Supplementary file 2. — DOI: http://dx.doi.org/10.7554/eLife.18931.014 [file elife-18931-supp2.xlsx]

## Sheet: All Lev responsive genes
chr	TSS_start	TSS_stop	Seq	FC( lev/mock)	p-value	adjusted.pvalue (FDR)	strand	Name	ID
IV	11745617	11745618	T12A7.1	32.3436	6.56705e-08	0.00144395	+	gem-4	WBGene00001577
III	5267770	5267771	ZC395.5	12.4407	0.000223876	0.011807	+		WBGene00022597
III	8653825	8653826	F22B7.9	10.4489	2.43447e-05	0.00495073	-		WBGene00017698
V	16069218	16069219	F14H3.10	10.3258	0.000957179	0.0230444	+	cyp-35D1	WBGene00008829
II	3898137	3898138	F53C3.6	10.3108	1.41248e-06	0.0019574	+		WBGene00018750
II	5447662	5447663	F56D1.6	10.0468	1.48858e-05	0.00449055	+	cex-1	WBGene00023407
I	9018718	9018719	F36F2.1	9.92672	3.77025e-06	0.00242182	+		WBGene00009475
II	3899853	3899854	F53C3.5	9.872	1.98984e-06	0.0019574	+		WBGene00018749
IV	13609859	13609860	C08F11.13	9.19975	2.92009e-07	0.00144695	-		WBGene00007460
V	12814106	12814107	ZC443.3	8.56182	9.66971e-07	0.00182314	-		WBGene00013898
II	5698938	5698939	C25H3.10	8.53547	1.10637e-05	0.00402371	-		WBGene00016119
IV	13609859	13609860	C08F11.13	8.2367	2.92009e-07	0.00144695	-		WBGene00007460
I	9581264	9581265	F42H11.2	7.87937	2.02618e-05	0.00481842	-	lem-3	WBGene00002276
V	13417590	13417591	F53F1.6	7.66685	1.80359e-05	0.0047962	-		WBGene00009984
III	8324613	8324614	F10E9.12	7.25352	4.62365e-06	0.00242182	+		WBGene00017361
V	7547992	7547993	C54F6.14	7.15195	3.83743e-05	0.00611421	-	ftn-1	WBGene00001500
X	10914009	10914010	F47B10.9	7.03733	2.14174e-06	0.00200473	-		WBGene00009820
III	9690168	9690169	C07A9.8	7.034	7.82365e-05	0.00819491	-		WBGene00007404
V	5753515	5753516	K09H11.7	6.85623	1.91462e-07	0.00144395	-		WBGene00019604
V	13909498	13909499	C06B3.6	6.63126	4.38802e-06	0.00242182	-		WBGene00007365
V	12814106	12814107	ZC443.3	6.63104	9.66971e-07	0.00182314	-		WBGene00013898
X	5647346	5647347	T22B7.3	6.44592	1.74174e-05	0.0047962	+		WBGene00020672
V	2731094	2731095	C24B9.9	6.39995	3.01513e-06	0.00241067	-	dod-3	WBGene00016052
III	5552074	5552075	F09F7.6	6.36306	3.19768e-07	0.00144695	-		WBGene00017303
V	5177239	5177240	C03A7.11	6.23213	5.78974e-05	0.00709118	-	ugt-51	WBGene00015369
X	5647346	5647347	T22B7.3	6.17747	1.74174e-05	0.0047962	+		WBGene00020672
IV	12527316	12527317	F53B2.8	6.09754	5.48672e-05	0.0068965	-		WBGene00009957
V	4041988	4041989	C49G7.10	6.07906	0.000157863	0.0104434	-		WBGene00016788
V	17322418	17322419	F31E9.1	5.94833	5.59333e-05	0.00699166	-	fbxa-180	WBGene00009295
V	5087105	5087106	Y58A7A.5	5.88259	7.55399e-05	0.00818081	-		WBGene00021979
II	8485887	8485888	M05D6.7	5.66633	2.71876e-05	0.00519224	+	gbh-2	WBGene00001523
IV	11067050	11067051	Y5F2A.2	5.64893	3.26625e-06	0.00241067	-	ttr-17	WBGene00012383
V	10938820	10938821	F17C11.11	5.64526	6.73203e-05	0.00765388	-		WBGene00008922
I	14157616	14157617	C37A5.8	5.62214	0.00051288	0.01773	+	fipr-24	WBGene00007992
V	5845703	5845704	F26F12.3	5.59319	7.29424e-07	0.00182314	-		WBGene00017834
V	11096079	11096080	Y42A5A.3	5.56878	0.000123784	0.00952592	-		WBGene00012778
V	462601	462602	M02H5.4	5.56479	4.70453e-05	0.00653006	+	nhr-202	WBGene00019742
V	5845703	5845704	F26F12.3	5.55267	7.29424e-07	0.00182314	-		WBGene00017834
V	13909734	13909735	C06B3.7	5.50424	0.000113826	0.00906801	+		WBGene00007366
V	6997095	6997096	C33G8.11	5.45363	1.06507e-05	0.00402371	-	nhr-107	WBGene00003697
V	18931351	18931352	Y80D3A.7	5.44654	0.000128605	0.00970285	-	ptr-22	WBGene00004236
X	8069500	8069501	C18A11.1	5.30175	8.86915e-07	0.00182314	+		WBGene00015947
II	9468557	9468558	R09D1.11	5.23866	1.12384e-05	0.00402371	-		WBGene00011167
I	8785408	8785409	DY3.6	5.19623	2.33619e-05	0.00485492	-	mfb-1	WBGene00008439
X	1336909	1336910	F21E9.3	5.10144	4.56346e-06	0.00242182	-	ttr-37	WBGene00017667
V	14160846	14160847	T02B5.3	5.08722	9.26875e-05	0.00863058	-		WBGene00011364
I	13842726	13842727	W04A8.4	4.98771	0.000959866	0.0230444	-		WBGene00012239
X	9264273	9264274	F18G5.6	4.86879	1.34849e-05	0.00431515	-		WBGene00017582
V	10493383	10493384	C35A5.2	4.86833	1.41184e-05	0.0043166	+	ugt-33	WBGene00007946
I	7170024	7170025	K07G5.5	4.85302	6.78581e-05	0.00765682	+		WBGene00010644
II	9291957	9291958	C01G6.7	4.84012	0.00189989	0.0319354	+		WBGene00007228
IV	6802314	6802315	C17H12.4	4.8366	6.76315e-06	0.00325566	-		WBGene00015930
I	7490169	7490170	T28F4.4	4.80855	4.1786e-07	0.00157568	-		WBGene00012139
V	5080880	5080881	Y58A7A.3	4.75721	3.29029e-05	0.00572636	-		WBGene00021977
V	8977414	8977415	F59E11.12	4.73504	0.000104715	0.00894117	-	nhr-144	WBGene00019117
II	8012765	8012766	DH11.2	4.68	0.000232407	0.0119777	+	DH11.2	WBGene00008436
V	5845703	5845704	F26F12.3	4.67831	7.29424e-07	0.00182314	-		WBGene00017834
V	12792947	12792948	ZC455.6	4.63141	4.23848e-05	0.00633951	-	ugt-5	WBGene00013906
IV	3606791	3606792	ZC416.4	4.62915	3.2493e-05	0.00572636	+	kgb-2	WBGene00002188
V	3970498	3970499	B0213.15	4.62618	0.000147534	0.0102391	-	cyp-34A9	WBGene00015044
IV	6248512	6248513	F58F9.7	4.6229	0.00109471	0.0245328	-		WBGene00019060
V	3939112	3939113	K07C6.4	4.60377	4.27864e-05	0.00633951	+	cyp-35B1	WBGene00019472
IV	11749197	11749198	T12A7.6	4.60322	2.32174e-05	0.00485492	+		WBGene00011727
V	1447222	1447223	R09B5.9	4.54897	0.000264496	0.0129783	+	cnc-4	WBGene00000558
IV	7897530	7897531	C55F2.2	4.50458	1.03154e-05	0.00402371	-	ilys-4	WBGene00016958
III	12107664	12107665	Y75B8A.4	4.49543	0.00102194	0.0236416	+		WBGene00013541
V	6998801	6998802	C33G8.6	4.48976	1.68347e-05	0.0047962	+	nhr-42	WBGene00003632
IV	10761620	10761621	T25B9.7	4.43312	0.000275778	0.0133038	+	ugt-54	WBGene00012013
IV	7017615	7017616	C06G3.6	4.41896	8.24127e-05	0.00827413	+		WBGene00015552
V	4042389	4042390	C49G7.5	4.40372	0.000101815	0.00889408	+		WBGene00016783
IV	7520355	7520356	R05G6.10	4.35119	1.16849e-05	0.00402371	-		WBGene00019902
V	19445547	19445548	M04C3.1	4.32709	1.49606e-07	0.00144395	-		WBGene00010850
V	3851783	3851784	F47C10.2	4.32407	0.000461406	0.0167714	-	btb-21	WBGene00018540
V	16278171	16278172	F28G4.1	4.31014	0.000474858	0.0170224	+	cyp-37B1	WBGene00009226
I	4731605	4731606	C10H11.3	4.30488	0.000175818	0.0109283	+	ugt-25	WBGene00015692
V	3984398	3984399	B0213.4	4.28088	0.000715093	0.0205057	+	nlp-29	WBGene00003767
IV	6631733	6631734	C01B10.4	4.2669	3.51612e-06	0.00241067	-		WBGene00015279
IV	274570	274571	T21D12.9	4.24013	1.19028e-05	0.00402371	+		WBGene00020649
IV	2771787	2771788	Y54G2A.11	4.22349	2.21517e-06	0.00200473	-		WBGene00021876
V	2250544	2250545	F41B5.2	4.17972	7.25246e-05	0.00796538	+	cyp-33C7	WBGene00018260
IV	4294870	4294871	F15E6.3	4.17692	1.96758e-06	0.0019574	+		WBGene00017484
V	10357879	10357880	K07C5.5	4.17576	0.000513289	0.01773	-		WBGene00010628
V	1624432	1624433	Y46H3D.5	4.17201	6.39362e-05	0.00741824	-	nhr-110	WBGene00003700
V	1621535	1621536	F16B4.12	4.1602	4.21843e-05	0.00633951	-	nhr-117	WBGene00003707
X	6235504	6235505	C14F11.5	4.15182	0.000322058	0.0143906	-	hsp-43	WBGene00002024
V	15815639	15815640	F54B8.3	4.13412	2.95727e-06	0.00241067	-	fbxa-69	WBGene00010018
X	11008114	11008115	F59F3.4	4.11653	2.12512e-05	0.0048191	-		WBGene00010334
V	13572074	13572075	C50B8.4	4.10567	2.13016e-05	0.0048191	+		WBGene00008226
V	474810	474811	M02H5.1	4.08017	0.000420694	0.0161938	+	nhr-99	WBGene00003689
X	4920947	4920948	K05B2.4	4.07876	0.000213313	0.0116857	-		WBGene00019404
I	7574191	7574192	D2030.2	4.06818	1.19155e-05	0.00402371	+		WBGene00008412
V	14322907	14322908	F47B8.3	4.06547	9.55949e-05	0.00873778	-		WBGene00009804
V	12092007	12092008	R07B7.13	4.06212	2.95688e-05	0.00548356	+	nhr-206	WBGene00011097
V	7163575	7163576	F10D2.11	4.05537	1.91136e-05	0.0047962	-	ugt-41	WBGene00017336
V	3942200	3942201	K07C6.3	4.04725	0.00110113	0.0245328	+	cyp-35B2	WBGene00019471
II	7165799	7165800	C27H5.4	4.0361	5.14251e-05	0.00670032	-		WBGene00016174
I	6989066	6989067	C30F12.6	4.03427	2.3333e-05	0.00485492	+		WBGene00016265
X	10218699	10218700	F44A6.5	4.01317	0.000189054	0.0110774	-		WBGene00009677
IV	5340882	5340883	Y4C6B.2	4.00442	0.000635557	0.0194494	+		WBGene00021156
III	8158179	8158180	D2007.5	4.00207	4.36422e-05	0.00637035	-		WBGene00017045
II	6333954	6333955	C32D5.6	3.97623	2.33894e-05	0.00485492	-		WBGene00016314
V	12053933	12053934	F10C2.7	3.95948	0.000558347	0.0184149	+		WBGene00008647
IV	10239091	10239092	F01G10.2	3.93047	0.00234103	0.0360426	-	ech-8	WBGene00001157
V	8603542	8603543	F41E6.5	3.91551	8.3512e-06	0.00363357	+		WBGene00018286
V	18579755	18579756	Y51A2D.13	3.91493	0.000113579	0.00906801	-		WBGene00013080
II	2335938	2335939	F43C11.7	3.88933	4.04616e-06	0.00242182	+		WBGene00018384
II	8003100	8003101	DH11.3	3.88438	0.00250254	0.0373237	-	pgp-11	WBGene00004005
IV	10661837	10661838	K08C7.2	3.84524	0.000110366	0.00906801	+	fmo-1	WBGene00001476
I	9760808	9760809	F26E4.2	3.80669	0.000170548	0.0107406	-		WBGene00009157
V	20903946	20903947	F25C8.4	3.80446	8.58903e-05	0.008449	+		WBGene00009106
V	15659047	15659048	F53E4.1	3.7754	8.85828e-07	0.00182314	-		WBGene00009978
V	12513002	12513003	T28H10.3	3.75158	0.000355095	0.0151294	+		WBGene00012144
V	15659047	15659048	F53E4.1	3.74864	8.85828e-07	0.00182314	-		WBGene00009978
I	9042591	9042592	C31H5.4	3.74171	1.39229e-05	0.00431515	-		WBGene00007855
III	6194507	6194508	C23G10.6	3.73802	1.14024e-06	0.0019574	-		WBGene00016013
IV	307503	307504	K02D7.5	3.68896	4.36709e-06	0.00242182	+		WBGene00019300
V	13473569	13473570	T10G3.1	3.68465	2.56132e-05	0.00503162	-		WBGene00011692
V	6997095	6997096	C33G8.11	3.68157	1.06507e-05	0.00402371	-	nhr-107	WBGene00003697
IV	8739382	8739383	F21D5.5	3.68001	0.00029106	0.0137767	-		WBGene00009010
IV	11097829	11097830	M7.12	3.65725	0.000179174	0.0110458	-		WBGene00010887
V	10484716	10484717	Y32F6B.1	3.62101	0.000259321	0.0128384	-		WBGene00012531
I	7492042	7492043	T28F4.5	3.59407	3.67298e-06	0.00242182	+		WBGene00012140
V	20713889	20713890	Y44A6C.1	3.57689	0.000141651	0.0100252	+		WBGene00012850
I	13392105	13392106	C01A2.4	3.57507	1.38411e-05	0.00431515	+		WBGene00007216
IV	10935883	10935884	ZK593.6	3.56083	2.26379e-05	0.00485492	-	lgg-2	WBGene00002981
II	7900596	7900597	ZK675.2	3.55944	0.000205031	0.0114564	+	rev-1	WBGene00014066
IV	4152540	4152541	R07C12.1	3.55877	0.000154026	0.0103407	+		WBGene00019931
II	3902862	3902863	F53C3.3	3.5541	1.7889e-05	0.0047962	+		WBGene00018747
V	10104920	10104921	C08B6.1	3.53949	5.12295e-05	0.00670032	-	ugt-17	WBGene00007422
IV	6618486	6618487	C01B10.1	3.5393	0.000392811	0.0160157	-	drh-2	WBGene00001091
X	8548995	8548996	D2021.4	3.48793	0.00046403	0.0167979	-		WBGene00017048
III	962293	962294	T12B5.1	3.48734	5.02864e-05	0.00665339	+	fbxa-51	WBGene00020448
IV	3028939	3028940	Y54G2A.29	3.48031	0.00183232	0.0313217	-		WBGene00021893
I	14155485	14155486	C37A5.2	3.47554	0.00050984	0.0177129	+	fipr-22	WBGene00007989
III	7153707	7153708	K04G7.3	3.45531	2.43949e-06	0.00212282	-	ogt-1	WBGene00003858
II	7155590	7155591	C27H5.2	3.44759	0.000230196	0.0119454	+		WBGene00016172
II	6695270	6695271	C18H9.5	3.44413	5.33607e-05	0.00674573	-		WBGene00016003
III	7153707	7153708	K04G7.3	3.43186	2.43949e-06	0.00212282	-	ogt-1	WBGene00003858
IV	13633415	13633416	C08F11.5	3.42573	1.72679e-05	0.0047962	+	fbxa-98	WBGene00007453
V	2227202	2227203	F44C8.3	3.39837	0.00012588	0.00956542	+	nhr-18	WBGene00003617
III	8093519	8093520	K06H7.2	3.39731	0.000544647	0.0182261	+		WBGene00019456
X	9635589	9635590	F34H10.3	3.39388	1.92221e-05	0.0047962	-		WBGene00009380
V	7781792	7781793	C26F1.2	3.39229	0.00171837	0.0304555	+	cyp-32A1	WBGene00016147
II	1767808	1767809	F36H5.2	3.3913	3.99455e-05	0.00627616	+	math-27	WBGene00018101
II	6347688	6347689	C32D5.9	3.38222	1.44108e-06	0.0019574	-	lgg-1	WBGene00002980
V	11604544	11604545	F35B12.2	3.37104	0.00105686	0.0240558	-	dhs-20	WBGene00000983
IV	6627980	6627981	C01B10.10	3.37092	0.00148388	0.0282293	-		WBGene00015284
X	4898139	4898140	T07F12.4	3.36096	1.76964e-05	0.0047962	-		WBGene00020324
IV	4294870	4294871	F15E6.3	3.35992	1.96758e-06	0.0019574	+		WBGene00017484
X	7442533	7442534	C01C10.3	3.35064	2.14877e-05	0.0048191	-	acl-12	WBGene00015295
IV	17405592	17405593	T02D1.5	3.34699	0.000491909	0.0173729	-	pmp-4	WBGene00004061
V	6202608	6202609	W06H8.8	3.34027	1.72598e-06	0.0019574	-	ttn-1	WBGene00006436
V	15715624	15715625	Y6E2A.4	3.3216	9.52412e-06	0.0039848	-		WBGene00012398
V	6202608	6202609	W06H8.8	3.30819	1.72598e-06	0.0019574	-	ttn-1	WBGene00006436
V	728310	728311	C05E4.14	3.27122	2.21353e-05	0.00485492	+	srh-2	WBGene00005228
III	946280	946281	T12B5.10	3.26486	0.00118622	0.0252714	-	fbxa-60	WBGene00020456
V	8161969	8161970	F20D6.5	3.25863	0.000498221	0.0175035	+		WBGene00017635
II	1358013	1358014	C13A10.2	3.25444	0.000150471	0.0102925	-		WBGene00015729
IV	9371491	9371492	C10C5.2	3.25205	3.78681e-05	0.00611421	+		WBGene00007506
V	8907607	8907608	K06C4.8	3.22553	3.27024e-05	0.00572636	+		WBGene00019444
V	14324615	14324616	F47B8.4	3.21555	7.29653e-06	0.00329225	-		WBGene00009805
V	12245575	12245576	T04H1.4	3.2098	0.00268132	0.0384441	+	rad-50	WBGene00004296
I	4727302	4727303	C10H11.4	3.20858	2.84714e-05	0.00536481	+	ugt-28	WBGene00015693
III	2082809	2082810	Y48G9A.10	3.19811	0.00286693	0.0395755	+	cpt-3	WBGene00021703
II	1771653	1771654	F36H5.1	3.19761	0.000532329	0.0180299	+	math-26	WBGene00018100
II	1776316	1776317	C08F1.4	3.18841	8.83508e-05	0.00860555	+	math-3	WBGene00015608
I	6558701	6558702	F57B10.6	3.18012	1.36349e-05	0.00431515	+	xpg-1	WBGene00019004
V	12935035	12935036	T16G1.7	3.17114	0.00302062	0.0405908	-		WBGene00011801
I	11294173	11294174	Y53H1B.2	3.16287	8.14657e-05	0.00827413	-		WBGene00013181
IV	12150952	12150953	B0001.2	3.16195	0.00188832	0.0318011	-		WBGene00007087
IV	8764867	8764868	F20C5.4	3.15705	0.00042229	0.0161938	+		WBGene00008969
V	17899802	17899803	C06H5.2	3.1504	0.000225706	0.0118758	+	fbxa-157	WBGene00007393
V	4025076	4025077	K09D9.1	3.14106	0.000171582	0.0107406	+		WBGene00019564
II	6951257	6951258	F22D3.6	3.13575	0.000732777	0.0206207	-		WBGene00017702
X	3706729	3706730	C01C4.3	3.12524	3.73697e-05	0.00611421	+		WBGene00015293
I	4516083	4516084	Y119C1B.5	3.123	5.33696e-05	0.00674573	-		WBGene00022471
V	9356490	9356491	E02C12.13	3.11913	0.000124803	0.00953942	-	ttr-49	WBGene00023485
II	6453365	6453366	K06A1.5	3.11784	0.000156851	0.0104193	-		WBGene00019427
II	3225312	3225313	ZC239.16	3.09569	0.000122838	0.00951782	-		WBGene00022574
III	4442053	4442054	C28A5.3	3.09333	0.000373717	0.0155715	+	nex-3	WBGene00003590
X	11310157	11310158	F08G12.5	3.08988	0.000521857	0.0178711	-		WBGene00008588
IV	10935883	10935884	ZK593.6	3.08953	2.26379e-05	0.00485492	-	lgg-2	WBGene00002981
III	3992154	3992155	C36E8.2	3.05835	0.000108412	0.00902667	-	glb-11	WBGene00007981
II	11181595	11181596	F37H8.3	3.03864	0.00121869	0.0255541	+		WBGene00009512
IV	7189179	7189180	C42D4.1	3.0346	0.000262905	0.0129783	+		WBGene00016594
IV	9043331	9043332	Y73F4A.2	3.02624	0.00452907	0.0495954	-		WBGene00013515
II	5864173	5864174	F55C12.7	3.01977	0.000821634	0.0215906	+	tag-234	WBGene00018874
II	9427674	9427675	M176.5	3.00796	0.000673096	0.0200482	-		WBGene00010944
II	3753924	3753925	T24E12.5	3.00465	0.00119749	0.0254142	+		WBGene00020774
V	17546958	17546959	C18D4.8	3.00042	4.40612e-06	0.00242182	-		WBGene00007677
I	8133886	8133887	T28B8.1	2.98591	0.000396346	0.0160157	+		WBGene00012113
III	9914172	9914173	F40F12.7	2.97836	6.98525e-05	0.00778529	+		WBGene00009595
I	6941988	6941989	T10B11.5	2.9779	0.000159491	0.0104898	-		WBGene00020401
IV	8152429	8152430	B0218.2	2.97094	0.000637491	0.0194494	+		WBGene00015048
II	4433403	4433404	T12C9.5	2.95868	0.000108771	0.00902667	+	nhr-109	WBGene00003699
V	12503780	12503781	T28H10.1	2.95548	0.000221881	0.0117809	+		WBGene00012142
II	5864173	5864174	F55C12.7	2.95503	0.000821634	0.0215906	+	tag-234	WBGene00018874
I	8768319	8768320	DY3.4	2.95301	0.000147149	0.0102391	+	trt-1	WBGene00006618
V	12131431	12131432	C27A7.1	2.94425	0.00102165	0.0236416	+		WBGene00007753
X	10533686	10533687	F59F5.2	2.94388	5.92316e-05	0.00720492	+		WBGene00010341
IV	10957663	10957664	Y69E1A.5	2.94259	0.00016669	0.0106098	-		WBGene00013477
V	728310	728311	C05E4.14	2.91979	2.21353e-05	0.00485492	+	srh-2	WBGene00005228
X	15446661	15446662	R03A10.5	2.90509	0.00137743	0.0273982	+		WBGene00010985
II	5425717	5425718	F07F6.8	2.8928	0.000157038	0.0104193	-		WBGene00017220
V	11147326	11147327	T19C4.7	2.8903	0.000369902	0.0154696	+	nlp-33	WBGene00003771
III	12327705	12327706	Y75B8A.29	2.88521	9.98808e-05	0.00886197	+		WBGene00013560
II	8707105	8707106	C34C6.7	2.88102	3.70118e-05	0.00611421	+		WBGene00007919
X	14558432	14558433	H01A20.1	2.87799	1.1469e-05	0.00402371	+	nhr-3	WBGene00003602
V	3200529	3200530	K08D9.4	2.87701	0.000139801	0.00997705	-		WBGene00019525
V	10297374	10297375	B0024.4	2.87615	0.00447686	0.0493611	+		WBGene00007097
III	9743253	9743254	T05G5.1	2.87075	9.65774e-05	0.00873778	-		WBGene00011498
V	14090307	14090308	D1086.5	2.86981	0.0001962	0.011137	-		WBGene00008392
II	8417612	8417613	F14E5.1	2.86341	0.000983457	0.0233439	+		WBGene00008799
II	2422212	2422213	F42G2.2	2.85038	7.42121e-06	0.00329225	+		WBGene00018351
V	11046876	11046877	C45B11.3	2.84311	0.00192528	0.0322185	-	dhs-18	WBGene00000981
V	12104351	12104352	C13C4.1	2.83705	0.000217064	0.0117139	+	nhr-153	WBGene00007546
I	9404016	9404017	F16A11.1	2.81943	1.10037e-05	0.00402371	-		WBGene00008876
I	4792501	4792502	F54D7.4	2.81377	2.27998e-05	0.00485492	-	zig-7	WBGene00006984
IV	13252288	13252289	JC8.8	2.80938	9.94271e-05	0.00885645	-	ttr-51	WBGene00010440
V	8026671	8026672	F43H9.4	2.80913	7.04134e-05	0.00780933	+		WBGene00018400
I	6637429	6637430	D2092.1	2.80832	0.00014023	0.00997705	-		WBGene00017063
X	13269627	13269628	K09A11.3	2.80705	0.000159339	0.0104898	-	cyp-14A2	WBGene00010706
V	14462752	14462753	F08H9.3	2.80426	0.000156844	0.0104193	-		WBGene00008591
V	10891010	10891011	F32D8.12	2.80403	9.34582e-05	0.00863058	-		WBGene00009334
II	4678023	4678024	T05A7.1	2.79278	0.000364173	0.0153434	+		WBGene00020219
IV	9728655	9728656	C28D4.1	2.792	7.59029e-05	0.00818081	+	nhr-100	WBGene00003690
X	6019900	6019901	C09B8.4	2.79004	4.88809e-05	0.0065846	-		WBGene00015623
V	14171441	14171442	ZC376.3	2.7898	4.70984e-06	0.00242182	-		WBGene00013875
I	9435370	9435371	C17E4.10	2.78563	0.000690124	0.020278	+		WBGene00007647
V	17023449	17023450	F49H6.5	2.77688	0.00125755	0.0260365	+		WBGene00009908
IV	10697052	10697053	R102.5	2.77682	0.000378677	0.015651	-		WBGene00011292
IV	9510576	9510577	C33A12.4	2.77242	0.000720882	0.020524	-		WBGene00007883
X	9789152	9789153	F36G3.1	2.76802	0.000746005	0.0207096	-		WBGene00009482
IV	7180532	7180533	C42D4.2	2.75901	0.000543111	0.0182043	+		WBGene00016595
I	4178812	4178813	R12E2.2	2.75763	9.9407e-05	0.00885645	+		WBGene00020031
I	9404016	9404017	F16A11.1	2.75117	1.10037e-05	0.00402371	-		WBGene00008876
I	10047995	10047996	F10G8.9	2.743	4.31507e-05	0.00633951	+		WBGene00008667
V	9095985	9095986	F21C10.10	2.74027	0.000310525	0.0142219	+		WBGene00017659
II	9167770	9167771	T23G7.3	2.73927	0.0041124	0.0473268	-		WBGene00011966
X	7442533	7442534	C01C10.3	2.72185	2.14877e-05	0.0048191	-	acl-12	WBGene00015295
IV	10661837	10661838	K08C7.2	2.72086	0.000110366	0.00906801	+	fmo-1	WBGene00001476
IV	5364544	5364545	F41H10.4	2.71473	3.81355e-05	0.00611421	+		WBGene00018317
I	10117051	10117052	Y106G6D.8	2.70498	0.000136949	0.00986774	+		WBGene00013704
V	8995078	8995079	F59E11.5	2.704	0.000609422	0.0192842	+		WBGene00019111
III	4932152	4932153	C26E6.12	2.70279	0.000234797	0.0120734	-		WBGene00016145
V	9254603	9254604	F07C3.9	2.7025	9.27049e-05	0.00863058	-		WBGene00017197
II	8566805	8566806	F54C9.3	2.69936	0.00106088	0.0240987	-		WBGene00010041
V	13259277	13259278	C34D1.4	2.69239	0.000200084	0.011261	-		WBGene00007931
V	20226804	20226805	Y113G7B.14	2.69138	0.000820344	0.0215906	+		WBGene00013763
V	16620886	16620887	Y70C5A.3	2.68669	0.00128303	0.0263417	-		WBGene00050904
V	17322418	17322419	F31E9.1	2.68543	5.59333e-05	0.00699166	-	fbxa-180	WBGene00009295
V	15924451	15924452	F35E8.12	2.67506	0.000147201	0.0102391	-	nhr-108	WBGene00003698
V	3987885	3987886	B0213.3	2.66107	0.000828204	0.0216126	+	nlp-28	WBGene00003766
I	4556811	4556812	Y119C1B.10	2.65963	0.000319655	0.0143906	-		WBGene00022475
II	7322870	7322871	F21D12.3	2.65623	4.21177e-05	0.00633951	-		WBGene00017663
X	2319324	2319325	T01B6.3	2.65168	0.00109556	0.0245328	-		WBGene00020135
IV	10250624	10250625	F01G10.8	2.65018	0.000103355	0.00894117	+	daf-14	WBGene00000910
IV	11259442	11259443	C05C12.3	2.64512	0.00141626	0.0276232	-	gtl-1	WBGene00001795
V	9991617	9991618	K08H10.7	2.62783	0.000166593	0.0106098	-	rde-1	WBGene00004323
III	10330327	10330328	T07C4.9	2.62777	0.000310482	0.0142219	-	nex-2	WBGene00003589
II	7608234	7608235	R07G3.2	2.62612	0.000285582	0.0136314	+		WBGene00019939
V	10955946	10955947	F17C11.13	2.62486	1.35753e-05	0.00431515	+		WBGene00023503
IV	11592834	11592835	F40F11.3	2.62147	0.000633249	0.0194494	-		WBGene00009588
IV	10142140	10142141	K08F4.7	2.61903	0.00100727	0.0235672	+	gst-4	WBGene00001752
IV	10697052	10697053	R102.5	2.61761	0.000378677	0.015651	-		WBGene00011292
III	7566346	7566347	R13A5.3	2.61677	0.00175333	0.0307206	+	ttr-32	WBGene00020047
III	6897961	6897962	T07E3.4	2.61541	4.54129e-05	0.00648501	+		WBGene00020315
IV	7789495	7789496	C33H5.11	2.61262	0.000846859	0.0217449	-	imp-3	WBGene00016378
III	7115377	7115378	B0280.8	2.60804	4.53471e-05	0.00648501	-	nhr-10	WBGene00003609
I	4178812	4178813	R12E2.2	2.60767	9.9407e-05	0.00885645	+		WBGene00020031
I	9016790	9016791	F36F2.2	2.60537	0.00408354	0.0472238	+		WBGene00009476
V	6276423	6276424	F31F7.1	2.60506	0.000218594	0.0117262	+		WBGene00017964
II	1609007	1609008	C08E3.5	2.6041	0.000375698	0.0156067	-	fbxa-162	WBGene00015597
II	9470020	9470021	T19H5.6	2.6019	0.000845464	0.0217371	-		WBGene00044807
V	12937170	12937171	T16G1.6	2.59225	0.0012047	0.0254142	-		WBGene00011800
II	6324452	6324453	C32D5.2	2.59064	0.000162584	0.0106008	+	sma-6	WBGene00004860
IV	11094981	11094982	M7.8	2.58524	0.000734606	0.0206226	-		WBGene00010884
I	7853743	7853744	R11A5.1	2.57943	6.27948e-05	0.00739964	+	apb-3	WBGene00000163
I	6800385	6800386	E02D9.1	2.57782	0.000737277	0.0206226	+		WBGene00017098
II	6594222	6594223	C56C10.10	2.56451	0.000183956	0.0110774	-		WBGene00016966
V	7847144	7847145	C37C3.8	2.56379	1.90311e-05	0.0047962	-	tag-253	WBGene00016500
IV	8739382	8739383	F21D5.5	2.55918	0.00029106	0.0137767	-		WBGene00009010
I	5511691	5511692	F59A3.6	2.55647	2.86914e-05	0.00536481	-		WBGene00019079
I	11675932	11675933	F11A6.1	2.55554	0.000365557	0.0153731	+	kpc-1	WBGene00002232
II	7104958	7104959	F10E7.8	2.5543	1.05456e-05	0.00402371	-		WBGene00017349
V	8123664	8123665	D1014.5	2.55369	0.000358278	0.0151294	+		WBGene00017018
III	2947	2948	cTel54X.1	2.55014	0.000190049	0.0110774	-	fbxa-6	WBGene00008352
IV	7782486	7782487	C33H5.9	2.54465	0.000545943	0.0182261	-	sec-10	WBGene00016376
X	9635589	9635590	F34H10.3	2.5431	1.92221e-05	0.0047962	-		WBGene00009380
X	10251294	10251295	C14H10.2	2.54058	9.32923e-05	0.00863058	-		WBGene00007592
IV	9245506	9245507	Y11D7A.5	2.53998	0.00357411	0.0440065	-		WBGene00012429
V	9373565	9373566	E02C12.8	2.53466	0.000541836	0.0182043	-		WBGene00017093
X	6597083	6597084	T28B4.3	2.53331	0.000453949	0.0167667	-	ttr-6	WBGene00020886
V	4908857	4908858	H23N18.1	2.53024	0.000219234	0.0117262	+	ugt-13	WBGene00019232
II	4505143	4505144	T05C1.4	2.52896	7.68475e-05	0.00819491	-		WBGene00020251
III	6087403	6087404	C05D10.3	2.52805	4.61475e-05	0.00648501	-	wht-1	WBGene00015479
X	514533	514534	B0310.3	2.52245	6.37599e-05	0.00741824	-		WBGene00015139
III	6159790	6159791	F42A10.2	2.51924	0.000121674	0.00946007	+	nfm-1	WBGene00003593
III	8229654	8229655	C02F5.7	2.51066	1.89551e-05	0.0047962	+		WBGene00015350
V	10581864	10581865	T21C9.6	2.5066	0.000885779	0.0222428	+		WBGene00011893
IV	10799634	10799635	C06G8.3	2.50554	2.16055e-05	0.0048191	+		WBGene00014669
IV	3384143	3384144	B0546.4	2.50203	0.000295964	0.0138637	-		WBGene00015251
V	12810053	12810054	ZC443.1	2.50065	0.0036107	0.0442988	-		WBGene00013896
III	7865221	7865222	C02C2.4	2.49993	0.000350955	0.0150788	-		WBGene00015333
II	5005085	5005086	F59A6.4	2.49963	0.0031534	0.0413358	+		WBGene00019086
II	9197458	9197459	ZK1067.1	2.49578	4.89758e-05	0.0065846	+	let-23	WBGene00002299
V	11570418	11570419	H12C20.6	2.49524	4.6065e-05	0.00648501	+	nhr-101	WBGene00003691
I	9881494	9881495	T23H4.2	2.49279	0.000417478	0.0161938	-	nhr-69	WBGene00003659
V	15052508	15052509	C25D7.4	2.4861	0.000933867	0.0228666	-	fbxa-82	WBGene00007716
V	12659669	12659670	W05B10.2	2.48603	0.000735256	0.0206226	-		WBGene00012277
X	14558432	14558433	H01A20.1	2.48551	1.1469e-05	0.00402371	+	nhr-3	WBGene00003602
IV	274570	274571	T21D12.9	2.48041	1.19028e-05	0.00402371	+		WBGene00020649
I	9747944	9747945	K02A11.3	2.4727	0.000133805	0.00981783	-		WBGene00010488
III	11033073	11033074	Y48A6B.9	2.46825	0.000316563	0.0143906	+		WBGene00012970
III	7913534	7913535	ZK688.12	2.46216	0.000357392	0.0151294	-		WBGene00044763
V	10756607	10756608	F28H7.6	2.4586	0.000529869	0.0179734	-		WBGene00009239
X	7954307	7954308	C14F5.1	2.45425	0.000310463	0.0142219	+	dct-1	WBGene00015776
II	4438867	4438868	T12C9.6	2.4489	0.000399376	0.0160225	+	nhr-16	WBGene00003615
III	13139512	13139513	Y39E4B.9	2.44819	0.000938771	0.0228823	-	bre-2	WBGene00000267
X	7437935	7437936	C01C10.2	2.44687	0.000730307	0.0206156	-		WBGene00015294
V	11386680	11386681	F55C10.4	2.44679	7.86268e-05	0.00819784	+		WBGene00010108
V	8014161	8014162	Y97E10AR.6	2.44446	6.48744e-05	0.00748869	-		WBGene00022401
V	11093595	11093596	Y42A5A.2	2.43991	0.00409934	0.0472238	-	lact-8	WBGene00012777
X	6904696	6904697	F14B8.2	2.43961	0.000630942	0.0194494	+		WBGene00017445
I	3294359	3294360	W01B11.6	2.43901	0.000433117	0.0164971	-		WBGene00020917
III	4419820	4419821	R07E5.8	2.43507	0.000249957	0.0125394	+	cku-80	WBGene00000520
II	7877943	7877944	T01H3.2	2.42683	0.000583504	0.0188136	-		WBGene00011348
V	2278244	2278245	T27B7.1	2.42311	7.08374e-05	0.00781803	-	nhr-59	WBGene00003649
I	7683335	7683336	T23G11.5	2.41929	0.0002165	0.0117139	+	rlbp-1	WBGene00011970
V	12121650	12121651	C13C4.6	2.41249	0.000916928	0.0225751	+		WBGene00007550
I	7094746	7094747	F22D6.5	2.40464	0.000608107	0.0192814	-	prpf-4	WBGene00004186
IV	9045336	9045337	Y73F4A.1	2.40393	0.000135294	0.00981783	-		WBGene00013514
V	2236029	2236030	F44C8.1	2.40049	9.68681e-06	0.0039848	+	cyp-33C4	WBGene00018413
I	2818768	2818769	W03D8.11	2.39659	0.00010482	0.00894117	+		WBGene00044796
III	8108724	8108725	C14B9.3	2.39593	6.59631e-05	0.00757571	+		WBGene00015753
V	10248880	10248881	C12D8.10	2.38985	1.17966e-05	0.00402371	+	akt-1	WBGene00000102
IV	14837134	14837135	Y57G11C.22	2.38932	4.2201e-05	0.00633951	+		WBGene00013317
II	4433403	4433404	T12C9.5	2.38837	0.000108771	0.00902667	+	nhr-109	WBGene00003699
I	9699545	9699546	C04F12.8	2.38059	0.000331236	0.014675	-		WBGene00007302
X	10890460	10890461	F47B10.5	2.38035	6.01203e-05	0.00723522	-		WBGene00009816
V	8964076	8964077	T19A5.4	2.38024	0.000210682	0.0115977	-	nhr-44	WBGene00003634
V	12101267	12101268	C13C4.2	2.37242	0.00134258	0.0269768	+	nhr-154	WBGene00007547
I	9132531	9132532	ZK858.4	2.3719	0.000153792	0.0103407	+	mel-26	WBGene00003209
X	6272039	6272040	W05H9.1	2.37013	7.12567e-06	0.00329225	+		WBGene00021048
V	11446634	11446635	F57B7.4	2.36407	0.00322111	0.0416973	+	mig-17	WBGene00003248
V	9173000	9173001	B0222.9	2.36385	5.26262e-06	0.00258841	-		WBGene00015057
IV	10904335	10904336	ZK596.3	2.36063	0.000198671	0.0112374	-		WBGene00014008
I	10806911	10806912	C35E7.9	2.35597	0.00434675	0.0488372	+		WBGene00016461
II	8008568	8008569	DH11.1	2.35383	0.00177192	0.0308857	+	DH11.1	WBGene00008435
III	3719654	3719655	C14B1.8	2.35283	0.000227862	0.0119062	-		WBGene00007579
X	9837980	9837981	F47A4.5	2.35072	3.50441e-05	0.0059669	-		WBGene00009801
II	6324452	6324453	C32D5.2	2.34435	0.000162584	0.0106008	+	sma-6	WBGene00004860
I	3338369	3338370	Y44E3A.1	2.34103	0.000820214	0.0215906	+		WBGene00021547
V	10256335	10256336	Y22F5A.1	2.34008	0.000631335	0.0194494	+	nhr-232	WBGene00012494
IV	4562562	4562563	F28E10.2	2.33734	0.00132224	0.0267822	+		WBGene00017901
I	8947189	8947190	F53B6.8	2.33098	0.000722798	0.020524	-	fipr-26	WBGene00009963
II	4608367	4608368	F35D11.3	2.32879	0.000420833	0.0161938	+		WBGene00018044
X	4265858	4265859	C52B9.3	2.32351	3.68919e-05	0.00611421	+		WBGene00016866
V	10248880	10248881	C12D8.10	2.32307	1.17966e-05	0.00402371	+	akt-1	WBGene00000102
II	9148294	9148295	W07A12.4	2.31649	4.26796e-05	0.00633951	+		WBGene00012322
IV	6093635	6093636	K08B4.6	2.31106	0.000404239	0.0160455	-	cpi-1	WBGene00000535
IV	10701349	10701350	R102.6	2.30635	6.34371e-05	0.00741824	-		WBGene00011293
V	13565849	13565850	C50B8.1	2.305	3.9577e-05	0.00626175	+		WBGene00008224
V	20544160	20544161	Y38H6C.17	2.30378	0.000152108	0.0103407	-		WBGene00012629
X	6809065	6809066	M03A8.2	2.29996	8.1803e-05	0.00827413	+		WBGene00019748
X	8761527	8761528	M02D8.5	2.29896	0.00108193	0.0244297	-		WBGene00019731
IV	8773181	8773182	F20C5.6	2.29333	0.00058553	0.0188176	-		WBGene00008971
IV	4821122	4821123	H06H21.8	2.2922	0.000571012	0.0186424	-		WBGene00019164
V	4896034	4896035	T19H12.1	2.28951	0.00175644	0.0307206	+	ugt-9	WBGene00020587
V	13627559	13627560	F53F4.14	2.28635	0.00129903	0.0264542	+		WBGene00009996
X	8231879	8231880	K02A6.3	2.27939	5.17852e-05	0.00670032	-		WBGene00019294
III	8308419	8308420	F10E9.4	2.27777	0.00115383	0.0249402	+		WBGene00017356
II	5884527	5884528	F55C12.1	2.26363	0.000185988	0.0110774	+		WBGene00018869
I	5810006	5810007	C32F10.4	2.25584	0.000209859	0.0115806	-		WBGene00016332
I	7422781	7422782	ZK524.2	2.25213	0.000226628	0.0118967	+	unc-13	WBGene00006752
III	9103904	9103905	ZK507.4	2.24852	1.05093e-05	0.00402371	+		WBGene00013980
III	8628488	8628489	F22B7.6	2.24839	3.50761e-05	0.0059669	-	polk-1	WBGene00017696
X	16367157	16367158	W09B12.1	2.24768	7.60474e-05	0.00818081	+	ace-1	WBGene00000035
V	11119688	11119689	H19N07.3	2.24626	8.13485e-05	0.00827413	-		WBGene00010407
I	6294898	6294899	C10G11.5	2.2417	0.000537354	0.0181457	+	pnk-1	WBGene00004068
V	2231123	2231124	F44C8.2	2.24155	0.000393638	0.0160157	+	nhr-134	WBGene00003724
V	16075300	16075301	F14H3.12	2.23892	0.00252227	0.0374636	-		WBGene00008831
II	11814044	11814045	F43G6.8	2.23744	0.000222341	0.0117809	-		WBGene00009660
I	11675932	11675933	F11A6.1	2.23329	0.000365557	0.0153731	+	kpc-1	WBGene00002232
V	12013585	12013586	F57F5.4	2.23007	0.000194061	0.011137	-	add-2	WBGene00000073
V	16219589	16219590	F11A5.10	2.22564	0.00436807	0.0489973	+	glc-1	WBGene00001591
X	8931187	8931188	D1009.1	2.22555	9.68103e-05	0.00873778	+		WBGene00017012
V	12810053	12810054	ZC443.1	2.22507	0.0036107	0.0442988	-		WBGene00013896
I	10562957	10562958	F25H2.8	2.22453	2.47986e-05	0.0049652	+	ubc-25	WBGene00006720
II	6303481	6303482	C29F5.1	2.22406	0.000130191	0.00975579	+		WBGene00016210
V	10084017	10084018	R04B5.4	2.2236	2.0445e-05	0.00481842	-	nhr-12	WBGene00003611
V	13305155	13305156	C26E1.2	2.22317	0.000139607	0.00997705	+		WBGene00007748
III	4468847	4468848	F56F3.4	2.22076	0.00152326	0.0285296	+		WBGene00010155
I	9715222	9715223	C16C2.4	2.21923	0.000188816	0.0110774	-		WBGene00007621
V	8076065	8076066	C09H5.2	2.20988	0.000838211	0.0216771	+		WBGene00015660
II	7724850	7724851	B0228.4	2.20983	0.0037662	0.0453246	+	tag-308	WBGene00015061
X	10074231	10074232	ZC373.5	2.20476	2.73094e-05	0.00519224	-		WBGene00013870
V	19413851	19413852	C25F9.4	2.20384	0.00137605	0.0273982	-		WBGene00007724
V	17899802	17899803	C06H5.2	2.2018	0.000225706	0.0118758	+	fbxa-157	WBGene00007393
III	5816159	5816160	R12B2.1	2.1968	1.68241e-05	0.0047962	+	sma-4	WBGene00004858
II	11152541	11152542	F40F8.7	2.19375	7.81653e-05	0.00819491	-	pqm-1	WBGene00004096
V	11201887	11201888	K10D6.4	2.19044	0.000303339	0.0140925	+		WBGene00010744
I	11675932	11675933	F11A6.1	2.18836	0.000365557	0.0153731	+	kpc-1	WBGene00002232
II	7855068	7855069	T09A5.6	2.18319	0.00116648	0.0249448	-	mdt-10	WBGene00007014
V	8974903	8974904	F59E11.11	2.1824	0.00165741	0.0298796	-	nhr-143	WBGene00019116
II	6661533	6661534	T19D12.2	2.17942	0.00011293	0.00906801	+		WBGene00020577
I	8288118	8288119	T01G9.2	2.1749	3.76372e-05	0.00611421	-		WBGene00011344
I	3662161	3662162	T28F2.7	2.17469	0.000379083	0.015651	-		WBGene00020903
I	5801301	5801302	B0414.7	2.17396	0.0036918	0.0449281	-	mtk-1	WBGene00003472
V	3950012	3950013	T09H2.1	2.17291	0.000229091	0.0119373	+	cyp-34A4	WBGene00020386
X	5805888	5805889	F13D11.3	2.17081	0.00106714	0.0241933	-		WBGene00017428
II	6323046	6323047	C32D5.4	2.16015	0.000857008	0.0218476	-		WBGene00016312
III	8992148	8992149	R08D7.7	2.15633	0.000508375	0.0177129	+		WBGene00011147
III	6608351	6608352	F20H11.4	2.15121	0.000999961	0.0235254	+		WBGene00017647
V	13259277	13259278	C34D1.4	2.14122	0.000200084	0.011261	-		WBGene00007931
V	12795288	12795289	ZC455.5	2.13827	2.59091e-05	0.00503162	-	ugt-4	WBGene00013905
III	1315209	1315210	Y82E9BL.14	2.13638	4.25892e-05	0.00633951	-	fbxa-80	WBGene00022330
V	17896777	17896778	C06H5.1	2.13536	4.88426e-05	0.0065846	-	fbxa-156	WBGene00007392
V	5019209	5019210	K11D12.3	2.129	0.00372834	0.0450434	+	srr-4	WBGene00005655
V	17376711	17376712	Y20C6A.1	2.12894	9.66111e-05	0.00873778	-		WBGene00012491
I	10562957	10562958	F25H2.8	2.1284	2.47986e-05	0.0049652	+	ubc-25	WBGene00006720
I	4792501	4792502	F54D7.4	2.12818	2.27998e-05	0.00485492	-	zig-7	WBGene00006984
IV	8115754	8115755	F42G8.9	2.12464	0.000959262	0.0230444	+		WBGene00018360
V	12345899	12345900	F23H12.1	2.11991	0.000624302	0.0194004	-	snb-2	WBGene00004898
IV	2601139	2601140	Y69A2AR.7	2.11956	4.3957e-05	0.00637518	+		WBGene00022078
IV	9032635	9032636	C53D6.6	2.11163	0.000263914	0.0129783	-		WBGene00008283
V	18083444	18083445	Y59A8B.11	2.11155	0.000102251	0.00889782	-	fbxa-106	WBGene00013348
III	5684052	5684053	F54E7.7	2.10354	0.000196406	0.011137	-	rcn-1	WBGene00004321
V	9889815	9889816	C50H2.1	2.10171	7.14777e-06	0.00329225	+	fshr-1	WBGene00008239
V	8936375	8936376	H14N18.1	2.09506	0.00144104	0.0278254	+	unc-23	WBGene00006760
V	9570268	9570269	F25B3.5	2.09371	0.000705064	0.0204252	-		WBGene00009102
V	9112768	9112769	F21C10.7	2.09347	0.000171849	0.0107406	+		WBGene00017657
V	2225426	2225427	F44C8.4	2.08653	0.000112778	0.00906801	+	nhr-103	WBGene00003693
V	12704365	12704366	R11D1.1	2.08652	0.000130221	0.00975579	+		WBGene00011242
I	7683335	7683336	T23G11.5	2.08387	0.0002165	0.0117139	+	rlbp-1	WBGene00011970
IV	2596332	2596333	Y69A2AR.8	2.08175	0.000863823	0.0219843	+		WBGene00022079
V	12263983	12263984	F55C5.2	2.07973	0.00284029	0.0393736	+		WBGene00010092
V	2565683	2565684	Y45G12C.1	2.0766	0.00257691	0.0379574	+		WBGene00021565
V	8184298	8184299	F20D6.3	2.07419	1.32463e-05	0.00431515	+	srp-8	WBGene00005649
I	7968681	7968682	T22C1.11	2.07299	0.000850092	0.0217572	-		WBGene00011920
X	8718921	8718922	F53A9.8	2.0677	0.00073778	0.0206226	-		WBGene00018731
V	18560277	18560278	Y51A2D.11	2.06323	0.00408382	0.0472238	-	ttr-26	WBGene00013079
III	8628488	8628489	F22B7.6	2.06314	3.50761e-05	0.0059669	-	polk-1	WBGene00017696
IV	5364259	5364260	F41H10.6	2.05731	0.00187635	0.0317282	-		WBGene00018319
V	11496354	11496355	T11F9.12	2.04696	0.00119639	0.0254142	-		WBGene00011713
V	610471	610472	ZK488.2	2.04196	0.000689351	0.020278	+	nhr-90	WBGene00003680
I	6188161	6188162	T05E7.3	2.0413	0.000152539	0.0103407	+		WBGene00020259
X	670798	670799	T19D7.6	2.03816	0.00115775	0.0249402	-		WBGene00020574
V	8460397	8460398	T23B12.6	2.03634	4.91844e-05	0.0065846	-		WBGene00020721
IV	8612379	8612380	F42A9.5	2.03603	0.00146731	0.0280628	+	cyp-33E2	WBGene00018334
V	9030526	9030527	C25E10.5	2.03193	0.000342013	0.0148344	+		WBGene00016095
III	3519593	3519594	M01F1.5	2.03185	0.000112522	0.00906801	-	hmit-1.3	WBGene00010811
V	19014608	19014609	Y39B6A.30	2.03173	0.00159994	0.0292578	+		WBGene00012689
V	12904081	12904082	R90.2	2.031	0.00311408	0.0411484	-	ttr-27	WBGene00011284
IV	16736231	16736232	Y51H4A.25	2.02944	0.000586376	0.0188181	+		WBGene00013119
V	12084296	12084297	R07B7.8	2.02572	0.00213806	0.0342347	-		WBGene00011092
V	14316608	14316609	F47B8.2	2.02536	0.000439355	0.0165674	-		WBGene00009803
I	12232680	12232681	F14B6.6	2.02098	0.0014872	0.0282518	+		WBGene00008787
V	9112768	9112769	F21C10.7	2.01492	0.000171849	0.0107406	+		WBGene00017657
X	1054211	1054212	K03E6.3	2.01152	0.00043545	0.0165026	+	ncs-3	WBGene00003565
IV	8773181	8773182	F20C5.6	2.01012	0.00058553	0.0188176	-		WBGene00008971
V	10505827	10505828	C35A5.5	2.00647	0.000290683	0.0137767	+		WBGene00007949
II	5873591	5873592	F55C12.5	2.00629	9.04533e-05	0.00860555	-		WBGene00018872
X	2118250	2118251	F53B1.6	2.0057	0.000288347	0.0137344	-		WBGene00018738
III	5573954	5573955	F09F7.1	-2.01592	1.97086e-05	0.0047962	+		WBGene00017299
X	1479535	1479536	D1005.1	-2.03583	0.00153961	0.0287643	+		WBGene00016995
V	13756397	13756398	F20G2.2	-2.03664	0.000108918	0.00902667	-		WBGene00008986
I	12968910	12968911	C47B2.5	-2.03679	0.000312439	0.0142806	+	eif-6	WBGene00001234
IV	17186874	17186875	C52D10.1	-2.05621	0.000809596	0.0214738	+		WBGene00016875
II	13957448	13957449	W07G1.3	-2.06766	3.05335e-05	0.00557114	-	zip-3	WBGene00012330
IV	9159003	9159004	F23B2.11	-2.07599	0.000239059	0.0122093	-	pcp-3	WBGene00003958
X	14320327	14320328	C11H1.9	-2.08869	0.000132909	0.00981783	-		WBGene00023500
I	9357070	9357071	M04C9.4	-2.09762	0.000131663	0.00979895	-		WBGene00010859
V	18492237	18492238	Y51A2D.19	-2.10796	0.000383135	0.0157608	+	slo-1	WBGene00004830
IV	1093919	1093920	Y55F3AR.3	-2.12656	0.00461871	0.0499753	-		WBGene00021934
III	10267289	10267290	R01H10.7	-2.12803	0.000133554	0.00981783	-		WBGene00010975
V	19047018	19047019	Y39B6A.21	-2.14791	2.17259e-05	0.0048191	+		WBGene00012680
IV	1012652	1012653	Y55F3AM.3	-2.23042	4.66003e-05	0.00650822	+		WBGene00021921
II	12627121	12627122	Y38E10A.15	-2.24117	0.00101166	0.0236211	+		WBGene00012593
V	19697367	19697368	Y43F8C.13	-2.26651	0.000237501	0.0121847	-		WBGene00012834
III	542064	542065	T22F7.1	-2.28968	8.12575e-05	0.00827413	+		WBGene00020701
V	4826745	4826746	C37H5.8	-2.32392	0.00409328	0.0472238	-	hsp-6	WBGene00002010
III	1258405	1258406	Y119D3B.19	-2.36788	0.00148986	0.0282548	-	fbxa-78	WBGene00022495
II	237820	237821	Y43H11AL.2	-2.38676	0.000105516	0.00894117	-		WBGene00021546
II	12919508	12919509	F58G1.1	-2.38747	0.00281682	0.0392913	+		WBGene00010263
X	13841542	13841543	M03B6.1	-2.39089	3.14276e-05	0.00568839	+		WBGene00010833
V	9737567	9737568	F40F9.9	-2.39273	0.00122483	0.0256116	+	aqp-4	WBGene00000172
V	16339004	16339005	F57G8.5	-2.39907	0.000124601	0.00953942	+		WBGene00010214
III	2418335	2418336	W04B5.3	-2.40312	0.00040194	0.0160225	+		WBGene00021020
X	12762015	12762016	F22E10.5	-2.42991	1.81669e-05	0.0047962	+		WBGene00009057
I	3163690	3163691	Y54E10A.6	-2.44872	0.000578163	0.0187616	+		WBGene00021828
V	11265631	11265632	F07B10.1	-2.45449	3.81306e-05	0.00611421	-	cln-3.1	WBGene00000539
I	7643323	7643324	F26A3.2	-2.48063	0.00271411	0.0386937	-	ncbp-2	WBGene00009141
I	12942269	12942270	F08A8.2	-2.48629	0.00254722	0.0376183	+		WBGene00008565
II	13715801	13715802	Y54G9A.4	-2.49955	0.000268107	0.0131013	-		WBGene00013207
V	5410978	5410979	F08F3.4	-2.5463	0.00063629	0.0194494	+		WBGene00017262
I	323352	323353	Y48G1A.5	-2.58208	0.00452033	0.0495748	-	imb-5	WBGene00002079
X	3270850	3270851	K09C4.8	-2.63653	0.0001052	0.00894117	-	sul-1	WBGene00006308
IV	13179358	13179359	F09E8.7	-2.65465	1.46888e-06	0.0019574	-	lev-1	WBGene00002974
V	281716	281717	Y58G8A.4	-2.66678	0.00129016	0.0264175	-		WBGene00021983
V	3772044	3772045	R08E5.3	-2.67716	9.28716e-06	0.00396457	+		WBGene00019963
II	14494438	14494439	K10H10.2	-2.71749	0.00087168	0.022088	-		WBGene00010759
IV	7237717	7237718	D2024.3	-2.76378	0.000164524	0.0106098	+	elo-3	WBGene00001241
IV	4530319	4530320	ZK185.3	-2.77613	2.98498e-05	0.00549067	-		WBGene00022683
IV	17186874	17186875	C52D10.1	-2.79363	0.000809596	0.0214738	+		WBGene00016875
X	16770426	16770427	C10E2.6	-2.81708	0.00342101	0.0429763	-		WBGene00015676
II	9161318	9161319	W07A12.7	-2.85676	0.000282366	0.013535	+	rhy-1	WBGene00012324
III	9138623	9138624	ZK512.7	-2.88072	0.00278567	0.0391464	-		WBGene00013986
V	6524972	6524973	F46E10.1	-2.94181	0.00074435	0.0207027	+		WBGene00018488
V	3776121	3776122	R08E5.2	-3.00769	1.97148e-05	0.0047962	-		WBGene00019962
X	1148339	1148340	R193.2	-3.07966	0.000448443	0.0167426	-		WBGene00020128
IV	17467377	17467378	F11E6.5	-3.12182	5.73093e-05	0.00709118	-	elo-2	WBGene00001240
IV	12599145	12599146	K08E7.9	-3.17853	0.00311546	0.0411484	-	pgp-1	WBGene00003995
X	14515010	14515011	D1025.2	-3.26514	0.000242398	0.012269	-		WBGene00008354
V	4617933	4617934	F54D11.2	-3.43087	0.000382621	0.0157608	+		WBGene00018812
V	8017927	8017928	F43H9.2	-3.5462	0.000101184	0.00889408	+	sptl-2	WBGene00018398
V	6524972	6524973	F46E10.1	-3.59528	0.00074435	0.0207027	+		WBGene00018488
II	12620818	12620819	Y38E10A.13	-3.71777	0.00103089	0.0237999	-		WBGene00012591
X	7305524	7305525	K03A1.5	-3.73951	0.000104297	0.00894117	-	sur-5	WBGene00006351
III	9138623	9138624	ZK512.7	-3.7577	0.00278567	0.0391464	-		WBGene00013986
V	8768887	8768888	B0507.3	-4.21969	1.9677e-05	0.0047962	+		WBGene00015220
X	7305524	7305525	K03A1.5	-4.40769	0.000104297	0.00894117	-	sur-5	WBGene00006351
X	978441	978442	C44C1.5	-4.79619	0.000144529	0.0101552	-		WBGene00016644
II	13585657	13585658	Y48E1B.8	-7.12549	4.16833e-06	0.00242182	+		WBGene00013007
III	9324965	9324966	C40H1.7	-7.61937	0.00160915	0.0293132	+		WBGene00008042
X	3282599	3282600	K09C4.5	-10.6665	4.28165e-06	0.00242182	+		WBGene00019550

## Sheet: HLH-1 peaks within 5kb
chr	TSS_start	TSS_stop	Seq	FC( lev/mock)	p-value	adjusted.pvalue (FDR)	strand	Name	ID	HLH1_peak_chr	HLH1_peak_start	HLH1_peak_stop	peak_pvalue	dist (genomic)	distance (up_or_downstream)
IV	11745617	11745618	T12A7.1	32.3436	6.56705e-08	0.00144395	+	gem-4	WBGene00001577	IV	11743862	11744667	1.55472e-19	-951	-951
III	8653825	8653826	F22B7.9	10.4489	2.43447e-05	0.00495073	-		WBGene00017698	III	8654493	8654692	0.00443605	668	-668
II	3898137	3898138	F53C3.6	10.3108	1.41248e-06	0.0019574	+		WBGene00018750	II	3897863	3897982	0.00145791	-156	-156
II	5447662	5447663	F56D1.6	10.0468	1.48858e-05	0.00449055	+	cex-1	WBGene00023407	II	5449225	5449886	2.54438e-27	1563	1563
I	9018718	9018719	F36F2.1	9.92672	3.77025e-06	0.00242182	+		WBGene00009475	I	9019013	9019318	1.94086e-32	295	295
II	3899853	3899854	F53C3.5	9.872	1.98984e-06	0.0019574	+		WBGene00018749	II	3897863	3897982	0.00145791	-1872	-1872
V	12814106	12814107	ZC443.3	8.56182	9.66971e-07	0.00182314	-		WBGene00013898	V	12814357	12814973	1.57756e-34	251	-251
II	5698938	5698939	C25H3.10	8.53547	1.10637e-05	0.00402371	-		WBGene00016119	II	5701489	5702015	2.68779e-08	2551	-2551
I	9581264	9581265	F42H11.2	7.87937	2.02618e-05	0.00481842	-	lem-3	WBGene00002276	I	9581511	9581700	0.000384328	247	-247
III	8324613	8324614	F10E9.12	7.25352	4.62365e-06	0.00242182	+		WBGene00017361	III	8327083	8327103	7.35552e-05	2470	2470
X	10914009	10914010	F47B10.9	7.03733	2.14174e-06	0.00200473	-		WBGene00009820	X	10914277	10914285	0.00368203	268	-268
V	13909498	13909499	C06B3.6	6.63126	4.38802e-06	0.00242182	-		WBGene00007365	V	13907778	13907930	0.00415228	-1569	1569
V	12814106	12814107	ZC443.3	6.63104	9.66971e-07	0.00182314	-		WBGene00013898	V	12814357	12814973	1.57756e-34	251	-251
X	5647346	5647347	T22B7.3	6.44592	1.74174e-05	0.0047962	+		WBGene00020672	X	5647725	5648079	1.32323e-05	379	379
V	2731094	2731095	C24B9.9	6.39995	3.01513e-06	0.00241067	-	dod-3	WBGene00016052	V	2730109	2730120	0.0057445	-975	975
III	5552074	5552075	F09F7.6	6.36306	3.19768e-07	0.00144695	-		WBGene00017303	III	5552288	5552521	1.14205e-08	214	-214
X	5647346	5647347	T22B7.3	6.17747	1.74174e-05	0.0047962	+		WBGene00020672	X	5647725	5648079	1.32323e-05	379	379
IV	12527316	12527317	F53B2.8	6.09754	5.48672e-05	0.0068965	-		WBGene00009957	IV	12531504	12531612	0.00468712	4188	-4188
V	17322418	17322419	F31E9.1	5.94833	5.59333e-05	0.00699166	-	fbxa-180	WBGene00009295	V	17317998	17318057	0.00509517	-4362	4362
II	8485887	8485888	M05D6.7	5.66633	2.71876e-05	0.00519224	+	gbh-2	WBGene00001523	II	8483835	8484076	4.09987e-08	-1812	-1812
IV	11067050	11067051	Y5F2A.2	5.64893	3.26625e-06	0.00241067	-	ttr-17	WBGene00012383	IV	11066989	11067511	7.80653e-07	0	0
V	10938820	10938821	F17C11.11	5.64526	6.73203e-05	0.00765388	-		WBGene00008922	V	10938756	10939018	2.55044e-07	0	0
V	5845703	5845704	F26F12.3	5.59319	7.29424e-07	0.00182314	-		WBGene00017834	V	5845830	5846165	5.75652e-07	127	-127
V	5845703	5845704	F26F12.3	5.55267	7.29424e-07	0.00182314	-		WBGene00017834	V	5845830	5846165	5.75652e-07	127	-127
V	13909734	13909735	C06B3.7	5.50424	0.000113826	0.00906801	+		WBGene00007366	V	13907778	13907930	0.00415228	-1805	-1805
I	8785408	8785409	DY3.6	5.19623	2.33619e-05	0.00485492	-	mfb-1	WBGene00008439	I	8783663	8784333	1.43145e-10	-1076	1076
I	13842726	13842727	W04A8.4	4.98771	0.000959866	0.0230444	-		WBGene00012239	I	13842315	13843473	8.64509e-22	0	0
X	9264273	9264274	F18G5.6	4.86879	1.34849e-05	0.00431515	-		WBGene00017582	X	9264643	9264946	2.21506e-15	370	-370
II	9291957	9291958	C01G6.7	4.84012	0.00189989	0.0319354	+		WBGene00007228	II	9294437	9294459	0.00946691	2480	2480
I	7490169	7490170	T28F4.4	4.80855	4.1786e-07	0.00157568	-		WBGene00012139	I	7494180	7494469	1.91851e-08	4011	-4011
II	8012765	8012766	DH11.2	4.68	0.000232407	0.0119777	+	DH11.2	WBGene00008436	II	8012559	8012853	5.88845e-13	0	0
V	5845703	5845704	F26F12.3	4.67831	7.29424e-07	0.00182314	-		WBGene00017834	V	5845830	5846165	5.75652e-07	127	-127
V	3970498	3970499	B0213.15	4.62618	0.000147534	0.0102391	-	cyp-34A9	WBGene00015044	V	3970887	3971145	0.00113955	389	-389
IV	11749197	11749198	T12A7.6	4.60322	2.32174e-05	0.00485492	+		WBGene00011727	IV	11748864	11749104	2.30546e-05	-94	-94
IV	7897530	7897531	C55F2.2	4.50458	1.03154e-05	0.00402371	-	ilys-4	WBGene00016958	IV	7898991	7899085	0.00801642	1461	-1461
IV	7017615	7017616	C06G3.6	4.41896	8.24127e-05	0.00827413	+		WBGene00015552	IV	7017722	7017903	0.000374716	107	107
V	16278171	16278172	F28G4.1	4.31014	0.000474858	0.0170224	+	cyp-37B1	WBGene00009226	V	16282747	16282775	0.000467276	4576	4576
I	4731605	4731606	C10H11.3	4.30488	0.000175818	0.0109283	+	ugt-25	WBGene00015692	I	4726466	4726680	5.47255e-07	-4926	-4926
IV	6631733	6631734	C01B10.4	4.2669	3.51612e-06	0.00241067	-		WBGene00015279	IV	6631955	6632155	4.28482e-05	222	-222
IV	274570	274571	T21D12.9	4.24013	1.19028e-05	0.00402371	+		WBGene00020649	IV	278000	278417	0.000113379	3430	3430
IV	2771787	2771788	Y54G2A.11	4.22349	2.21517e-06	0.00200473	-		WBGene00021876	IV	2772204	2772403	2.72749e-05	417	-417
V	2250544	2250545	F41B5.2	4.17972	7.25246e-05	0.00796538	+	cyp-33C7	WBGene00018260	V	2250334	2250356	0.00367739	-189	-189
IV	4294870	4294871	F15E6.3	4.17692	1.96758e-06	0.0019574	+		WBGene00017484	IV	4298573	4298729	0.00933456	3703	3703
V	10357879	10357880	K07C5.5	4.17576	0.000513289	0.01773	-		WBGene00010628	V	10355984	10356214	1.16719e-07	-1666	1666
V	1624432	1624433	Y46H3D.5	4.17201	6.39362e-05	0.00741824	-	nhr-110	WBGene00003700	V	1620239	1620442	0.000195741	-3991	3991
V	1621535	1621536	F16B4.12	4.1602	4.21843e-05	0.00633951	-	nhr-117	WBGene00003707	V	1620239	1620442	0.000195741	-1094	1094
X	6235504	6235505	C14F11.5	4.15182	0.000322058	0.0143906	-	hsp-43	WBGene00002024	X	6236768	6236950	0.00908464	1264	-1264
V	15815639	15815640	F54B8.3	4.13412	2.95727e-06	0.00241067	-	fbxa-69	WBGene00010018	V	15815458	15815474	0.0057535	-166	166
V	13572074	13572075	C50B8.4	4.10567	2.13016e-05	0.0048191	+		WBGene00008226	V	13568577	13568778	0.000100314	-3297	-3297
I	7574191	7574192	D2030.2	4.06818	1.19155e-05	0.00402371	+		WBGene00008412	I	7570741	7570877	0.000147854	-3315	-3315
V	14322907	14322908	F47B8.3	4.06547	9.55949e-05	0.00873778	-		WBGene00009804	V	14322772	14323133	2.95309e-05	0	0
V	12092007	12092008	R07B7.13	4.06212	2.95688e-05	0.00548356	+	nhr-206	WBGene00011097	V	12091897	12092054	0.00597753	0	0
III	8158179	8158180	D2007.5	4.00207	4.36422e-05	0.00637035	-		WBGene00017045	III	8158346	8158657	1.76652e-12	167	-167
II	6333954	6333955	C32D5.6	3.97623	2.33894e-05	0.00485492	-		WBGene00016314	II	6331430	6331804	2.4144e-16	-2151	2151
IV	10239091	10239092	F01G10.2	3.93047	0.00234103	0.0360426	-	ech-8	WBGene00001157	IV	10241725	10242005	1.12896e-14	2634	-2634
V	8603542	8603543	F41E6.5	3.91551	8.3512e-06	0.00363357	+		WBGene00018286	V	8604786	8605061	0.000772837	1244	1244
V	18579755	18579756	Y51A2D.13	3.91493	0.000113579	0.00906801	-		WBGene00013080	V	18581445	18582342	1.42781e-119	1690	-1690
IV	10661837	10661838	K08C7.2	3.84524	0.000110366	0.00906801	+	fmo-1	WBGene00001476	IV	10664778	10664977	0.00807137	2941	2941
I	9760808	9760809	F26E4.2	3.80669	0.000170548	0.0107406	-		WBGene00009157	I	9757461	9757604	0.00467305	-3205	3205
V	20903946	20903947	F25C8.4	3.80446	8.58903e-05	0.008449	+		WBGene00009106	V	20903835	20903998	0.000649837	0	0
V	15659047	15659048	F53E4.1	3.7754	8.85828e-07	0.00182314	-		WBGene00009978	V	15658662	15659061	3.91232e-32	0	0
V	12513002	12513003	T28H10.3	3.75158	0.000355095	0.0151294	+		WBGene00012144	V	12516373	12516741	0.0020908	3371	3371
V	15659047	15659048	F53E4.1	3.74864	8.85828e-07	0.00182314	-		WBGene00009978	V	15658662	15659061	3.91232e-32	0	0
I	9042591	9042592	C31H5.4	3.74171	1.39229e-05	0.00431515	-		WBGene00007855	I	9042793	9043063	1.29361e-19	202	-202
III	6194507	6194508	C23G10.6	3.73802	1.14024e-06	0.0019574	-		WBGene00016013	III	6198718	6198917	0.000888568	4211	-4211
IV	307503	307504	K02D7.5	3.68896	4.36709e-06	0.00242182	+		WBGene00019300	IV	311074	311147	0.005746	3571	3571
V	13473569	13473570	T10G3.1	3.68465	2.56132e-05	0.00503162	-		WBGene00011692	V	13473446	13473851	9.74778e-41	0	0
IV	8739382	8739383	F21D5.5	3.68001	0.00029106	0.0137767	-		WBGene00009010	IV	8737340	8737666	3.53222e-10	-1717	1717
I	7492042	7492043	T28F4.5	3.59407	3.67298e-06	0.00242182	+		WBGene00012140	I	7494180	7494469	1.91851e-08	2138	2138
V	20713889	20713890	Y44A6C.1	3.57689	0.000141651	0.0100252	+		WBGene00012850	V	20712857	20713273	3.50047e-10	-617	-617
IV	10935883	10935884	ZK593.6	3.56083	2.26379e-05	0.00485492	-	lgg-2	WBGene00002981	IV	10935357	10936431	5.36219e-46	0	0
II	7900596	7900597	ZK675.2	3.55944	0.000205031	0.0114564	+	rev-1	WBGene00014066	II	7904832	7904966	0.00289034	4236	4236
II	3902862	3902863	F53C3.3	3.5541	1.7889e-05	0.0047962	+		WBGene00018747	II	3906657	3906789	0.00374146	3795	3795
V	10104920	10104921	C08B6.1	3.53949	5.12295e-05	0.00670032	-	ugt-17	WBGene00007422	V	10102978	10102982	0.00548986	-1939	1939
IV	6618486	6618487	C01B10.1	3.5393	0.000392811	0.0160157	-	drh-2	WBGene00001091	IV	6618688	6618937	2.19141e-05	202	-202
X	8548995	8548996	D2021.4	3.48793	0.00046403	0.0167979	-		WBGene00017048	X	8550148	8550421	0.000208349	1153	-1153
III	962293	962294	T12B5.1	3.48734	5.02864e-05	0.00665339	+	fbxa-51	WBGene00020448	III	966326	966605	5.78401e-08	4033	4033
IV	3028939	3028940	Y54G2A.29	3.48031	0.00183232	0.0313217	-		WBGene00021893	IV	3028310	3028478	0.00374299	-462	462
III	7153707	7153708	K04G7.3	3.45531	2.43949e-06	0.00212282	-	ogt-1	WBGene00003858	III	7153805	7154110	1.26683e-12	98	-98
II	7155590	7155591	C27H5.2	3.44759	0.000230196	0.0119454	+		WBGene00016172	II	7155373	7155659	8.77144e-12	0	0
II	6695270	6695271	C18H9.5	3.44413	5.33607e-05	0.00674573	-		WBGene00016003	II	6692728	6692883	0.000599269	-2388	2388
III	7153707	7153708	K04G7.3	3.43186	2.43949e-06	0.00212282	-	ogt-1	WBGene00003858	III	7153805	7154110	1.26683e-12	98	-98
V	2227202	2227203	F44C8.3	3.39837	0.00012588	0.00956542	+	nhr-18	WBGene00003617	V	2227298	2227323	0.00376118	96	96
III	8093519	8093520	K06H7.2	3.39731	0.000544647	0.0182261	+		WBGene00019456	III	8093053	8093367	4.18275e-12	-153	-153
X	9635589	9635590	F34H10.3	3.39388	1.92221e-05	0.0047962	-		WBGene00009380	X	9637007	9638104	1.20337e-30	1418	-1418
II	1767808	1767809	F36H5.2	3.3913	3.99455e-05	0.00627616	+	math-27	WBGene00018101	II	1766628	1766639	0.000274639	-1170	-1170
II	6347688	6347689	C32D5.9	3.38222	1.44108e-06	0.0019574	-	lgg-1	WBGene00002980	II	6347781	6348118	0.000185124	93	-93
IV	6627980	6627981	C01B10.10	3.37092	0.00148388	0.0282293	-		WBGene00015284	IV	6631955	6632155	4.28482e-05	3975	-3975
X	4898139	4898140	T07F12.4	3.36096	1.76964e-05	0.0047962	-		WBGene00020324	X	4896940	4896993	0.00145604	-1147	1147
IV	4294870	4294871	F15E6.3	3.35992	1.96758e-06	0.0019574	+		WBGene00017484	IV	4298573	4298729	0.00933456	3703	3703
X	7442533	7442534	C01C10.3	3.35064	2.14877e-05	0.0048191	-	acl-12	WBGene00015295	X	7442682	7443075	2.5216e-14	149	-149
IV	17405592	17405593	T02D1.5	3.34699	0.000491909	0.0173729	-	pmp-4	WBGene00004061	IV	17404807	17404808	0.00131612	-785	785
V	6202608	6202609	W06H8.8	3.34027	1.72598e-06	0.0019574	-	ttn-1	WBGene00006436	V	6202115	6202974	6.02055e-15	0	0
V	15715624	15715625	Y6E2A.4	3.3216	9.52412e-06	0.0039848	-		WBGene00012398	V	15714720	15714801	0.000569455	-824	824
V	6202608	6202609	W06H8.8	3.30819	1.72598e-06	0.0019574	-	ttn-1	WBGene00006436	V	6202115	6202974	6.02055e-15	0	0
V	728310	728311	C05E4.14	3.27122	2.21353e-05	0.00485492	+	srh-2	WBGene00005228	V	724547	728267	2.67913e-38	-44	-44
IV	9371491	9371492	C10C5.2	3.25205	3.78681e-05	0.00611421	+		WBGene00007506	IV	9368259	9368586	1.16012e-08	-2906	-2906
V	14324615	14324616	F47B8.4	3.21555	7.29653e-06	0.00329225	-		WBGene00009805	V	14322772	14323133	2.95309e-05	-1483	1483
V	12245575	12245576	T04H1.4	3.2098	0.00268132	0.0384441	+	rad-50	WBGene00004296	V	12245066	12245268	0.000287743	-308	-308
I	4727302	4727303	C10H11.4	3.20858	2.84714e-05	0.00536481	+	ugt-28	WBGene00015693	I	4726466	4726680	5.47255e-07	-623	-623
I	6558701	6558702	F57B10.6	3.18012	1.36349e-05	0.00431515	+	xpg-1	WBGene00019004	I	6562136	6562159	0.00953041	3435	3435
I	11294173	11294174	Y53H1B.2	3.16287	8.14657e-05	0.00827413	-		WBGene00013181	I	11294044	11294473	1.91801e-45	0	0
IV	12150952	12150953	B0001.2	3.16195	0.00188832	0.0318011	-		WBGene00007087	IV	12145775	12145966	0.00208711	-4987	4987
IV	8764867	8764868	F20C5.4	3.15705	0.00042229	0.0161938	+		WBGene00008969	IV	8762510	8762890	2.04074e-27	-1978	-1978
V	4025076	4025077	K09D9.1	3.14106	0.000171582	0.0107406	+		WBGene00019564	V	4025328	4025412	7.35682e-05	252	252
II	6951257	6951258	F22D3.6	3.13575	0.000732777	0.0206207	-		WBGene00017702	II	6951382	6951782	5.46086e-24	125	-125
X	3706729	3706730	C01C4.3	3.12524	3.73697e-05	0.00611421	+		WBGene00015293	X	3706322	3707162	0.000274561	0	0
II	6453365	6453366	K06A1.5	3.11784	0.000156851	0.0104193	-		WBGene00019427	II	6453422	6453678	1.02211e-12	57	-57
IV	10935883	10935884	ZK593.6	3.08953	2.26379e-05	0.00485492	-	lgg-2	WBGene00002981	IV	10935357	10936431	5.36219e-46	0	0
III	3992154	3992155	C36E8.2	3.05835	0.000108412	0.00902667	-	glb-11	WBGene00007981	III	3991253	3991772	6.0276e-17	-383	383
II	11181595	11181596	F37H8.3	3.03864	0.00121869	0.0255541	+		WBGene00009512	II	11184928	11185284	1.80546e-14	3333	3333
IV	9043331	9043332	Y73F4A.2	3.02624	0.00452907	0.0495954	-		WBGene00013515	IV	9047003	9047348	1.37468e-07	3672	-3672
II	5864173	5864174	F55C12.7	3.01977	0.000821634	0.0215906	+	tag-234	WBGene00018874	II	5859425	5859441	0.00244207	-4733	-4733
II	3753924	3753925	T24E12.5	3.00465	0.00119749	0.0254142	+		WBGene00020774	II	3758168	3758295	0.00910174	4244	4244
V	17546958	17546959	C18D4.8	3.00042	4.40612e-06	0.00242182	-		WBGene00007677	V	17547233	17547266	0.00374265	275	-275
I	8133886	8133887	T28B8.1	2.98591	0.000396346	0.0160157	+		WBGene00012113	I	8133617	8134498	1.05986e-20	0	0
III	9914172	9914173	F40F12.7	2.97836	6.98525e-05	0.00778529	+		WBGene00009595	III	9910049	9910054	0.00510299	-4119	-4119
I	6941988	6941989	T10B11.5	2.9779	0.000159491	0.0104898	-		WBGene00020401	I	6945682	6945814	1.45594e-05	3694	-3694
IV	8152429	8152430	B0218.2	2.97094	0.000637491	0.0194494	+		WBGene00015048	IV	8148766	8149086	0.00243611	-3344	-3344
II	4433403	4433404	T12C9.5	2.95868	0.000108771	0.00902667	+	nhr-109	WBGene00003699	II	4433718	4433818	0.00318979	315	315
V	12503780	12503781	T28H10.1	2.95548	0.000221881	0.0117809	+		WBGene00012142	V	12504190	12504267	0.00951867	410	410
II	5864173	5864174	F55C12.7	2.95503	0.000821634	0.0215906	+	tag-234	WBGene00018874	II	5859425	5859441	0.00244207	-4733	-4733
I	8768319	8768320	DY3.4	2.95301	0.000147149	0.0102391	+	trt-1	WBGene00006618	I	8768030	8768262	0.00288498	-58	-58
X	10533686	10533687	F59F5.2	2.94388	5.92316e-05	0.00720492	+		WBGene00010341	X	10529295	10529622	3.58462e-08	-4065	-4065
IV	10957663	10957664	Y69E1A.5	2.94259	0.00016669	0.0106098	-		WBGene00013477	IV	10957502	10958544	4.59005e-58	0	0
V	728310	728311	C05E4.14	2.91979	2.21353e-05	0.00485492	+	srh-2	WBGene00005228	V	724547	728267	2.67913e-38	-44	-44
X	15446661	15446662	R03A10.5	2.90509	0.00137743	0.0273982	+		WBGene00010985	X	15448823	15448862	0.00231639	2162	2162
II	5425717	5425718	F07F6.8	2.8928	0.000157038	0.0104193	-		WBGene00017220	II	5426133	5426382	0.00244082	416	-416
II	8707105	8707106	C34C6.7	2.88102	3.70118e-05	0.00611421	+		WBGene00007919	II	8707027	8707325	1.86741e-07	0	0
X	14558432	14558433	H01A20.1	2.87799	1.1469e-05	0.00402371	+	nhr-3	WBGene00003602	X	14558551	14558960	6.02156e-05	119	119
V	3200529	3200530	K08D9.4	2.87701	0.000139801	0.00997705	-		WBGene00019525	V	3200540	3200765	0.0010005	11	-11
V	10297374	10297375	B0024.4	2.87615	0.00447686	0.0493611	+		WBGene00007097	V	10301024	10301058	0.0057485	3650	3650
III	9743253	9743254	T05G5.1	2.87075	9.65774e-05	0.00873778	-		WBGene00011498	III	9741778	9742796	5.88174e-72	-458	458
V	14090307	14090308	D1086.5	2.86981	0.0001962	0.011137	-		WBGene00008392	V	14090239	14090485	4.03694e-06	0	0
II	8417612	8417613	F14E5.1	2.86341	0.000983457	0.0233439	+		WBGene00008799	II	8417106	8417363	7.89791e-06	-250	-250
V	11046876	11046877	C45B11.3	2.84311	0.00192528	0.0322185	-	dhs-18	WBGene00000981	V	11044955	11045095	0.00434918	-1782	1782
I	4792501	4792502	F54D7.4	2.81377	2.27998e-05	0.00485492	-	zig-7	WBGene00006984	I	4792469	4792842	4.7379e-20	0	0
IV	13252288	13252289	JC8.8	2.80938	9.94271e-05	0.00885645	-	ttr-51	WBGene00010440	IV	13252232	13252643	3.2249e-05	0	0
V	8026671	8026672	F43H9.4	2.80913	7.04134e-05	0.00780933	+		WBGene00018400	V	8024844	8025064	4.02061e-06	-1608	-1608
X	13269627	13269628	K09A11.3	2.80705	0.000159339	0.0104898	-	cyp-14A2	WBGene00010706	X	13264565	13264887	9.07193e-10	-4741	4741
V	14462752	14462753	F08H9.3	2.80426	0.000156844	0.0104193	-		WBGene00008591	V	14464322	14464393	0.00671873	1570	-1570
V	10891010	10891011	F32D8.12	2.80403	9.34582e-05	0.00863058	-		WBGene00009334	V	10889723	10889732	0.00239793	-1279	1279
II	4678023	4678024	T05A7.1	2.79278	0.000364173	0.0153434	+		WBGene00020219	II	4676302	4676588	2.78341e-20	-1436	-1436
X	6019900	6019901	C09B8.4	2.79004	4.88809e-05	0.0065846	-		WBGene00015623	X	6020141	6020437	5.86107e-09	241	-241
I	9435370	9435371	C17E4.10	2.78563	0.000690124	0.020278	+		WBGene00007647	I	9435222	9435467	9.77488e-08	0	0
IV	10697052	10697053	R102.5	2.77682	0.000378677	0.015651	-		WBGene00011292	IV	10697116	10697866	2.36955e-42	64	-64
IV	9510576	9510577	C33A12.4	2.77242	0.000720882	0.020524	-		WBGene00007883	IV	9511168	9511942	3.25188e-12	592	-592
I	4178812	4178813	R12E2.2	2.75763	9.9407e-05	0.00885645	+		WBGene00020031	I	4178511	4178719	0.000209292	-94	-94
V	9095985	9095986	F21C10.10	2.74027	0.000310525	0.0142219	+		WBGene00017659	V	9095565	9096326	1.48196e-39	0	0
II	9167770	9167771	T23G7.3	2.73927	0.0041124	0.0473268	-		WBGene00011966	II	9169489	9169733	2.57751e-06	1719	-1719
X	7442533	7442534	C01C10.3	2.72185	2.14877e-05	0.0048191	-	acl-12	WBGene00015295	X	7442682	7443075	2.5216e-14	149	-149
IV	10661837	10661838	K08C7.2	2.72086	0.000110366	0.00906801	+	fmo-1	WBGene00001476	IV	10664778	10664977	0.00807137	2941	2941
IV	5364544	5364545	F41H10.4	2.71473	3.81355e-05	0.00611421	+		WBGene00018317	IV	5364139	5364438	0.00569404	-107	-107
I	10117051	10117052	Y106G6D.8	2.70498	0.000136949	0.00986774	+		WBGene00013704	I	10121961	10122310	4.26538e-06	4910	4910
III	4932152	4932153	C26E6.12	2.70279	0.000234797	0.0120734	-		WBGene00016145	III	4930351	4930473	0.000415852	-1680	1680
V	9254603	9254604	F07C3.9	2.7025	9.27049e-05	0.00863058	-		WBGene00017197	V	9259409	9260099	0.000282287	4806	-4806
II	8566805	8566806	F54C9.3	2.69936	0.00106088	0.0240987	-		WBGene00010041	II	8566136	8566319	0.00257796	-487	487
V	16620886	16620887	Y70C5A.3	2.68669	0.00128303	0.0263417	-		WBGene00050904	V	16621971	16622466	3.15314e-10	1085	-1085
V	17322418	17322419	F31E9.1	2.68543	5.59333e-05	0.00699166	-	fbxa-180	WBGene00009295	V	17317998	17318057	0.00509517	-4362	4362
V	15924451	15924452	F35E8.12	2.67506	0.000147201	0.0102391	-	nhr-108	WBGene00003698	V	15922394	15922593	0.00234385	-1859	1859
I	4556811	4556812	Y119C1B.10	2.65963	0.000319655	0.0143906	-		WBGene00022475	I	4557091	4557442	2.59596e-13	280	-280
II	7322870	7322871	F21D12.3	2.65623	4.21177e-05	0.00633951	-		WBGene00017663	II	7323278	7323617	1.06726e-11	408	-408
X	2319324	2319325	T01B6.3	2.65168	0.00109556	0.0245328	-		WBGene00020135	X	2318774	2318973	0.000213782	-352	352
IV	10250624	10250625	F01G10.8	2.65018	0.000103355	0.00894117	+	daf-14	WBGene00000910	IV	10251445	10251665	0.000288299	821	821
V	9991617	9991618	K08H10.7	2.62783	0.000166593	0.0106098	-	rde-1	WBGene00004323	V	9992829	9993224	2.30364e-05	1212	-1212
III	10330327	10330328	T07C4.9	2.62777	0.000310482	0.0142219	-	nex-2	WBGene00003589	III	10329565	10329871	0.00100326	-457	457
II	7608234	7608235	R07G3.2	2.62612	0.000285582	0.0136314	+		WBGene00019939	II	7603691	7603907	0.00595872	-4328	-4328
V	10955946	10955947	F17C11.13	2.62486	1.35753e-05	0.00431515	+		WBGene00023503	V	10951695	10952252	3.72843e-09	-3695	-3695
IV	11592834	11592835	F40F11.3	2.62147	0.000633249	0.0194494	-		WBGene00009588	IV	11592920	11593095	0.000170495	86	-86
IV	10142140	10142141	K08F4.7	2.61903	0.00100727	0.0235672	+	gst-4	WBGene00001752	IV	10141983	10142482	7.55338e-08	0	0
IV	10697052	10697053	R102.5	2.61761	0.000378677	0.015651	-		WBGene00011292	IV	10697116	10697866	2.36955e-42	64	-64
III	7566346	7566347	R13A5.3	2.61677	0.00175333	0.0307206	+	ttr-32	WBGene00020047	III	7567931	7568128	0.00228972	1585	1585
III	6897961	6897962	T07E3.4	2.61541	4.54129e-05	0.00648501	+		WBGene00020315	III	6897629	6898757	2.46505e-18	0	0
IV	7789495	7789496	C33H5.11	2.61262	0.000846859	0.0217449	-	imp-3	WBGene00016378	IV	7789482	7789882	9.40143e-11	0	0
III	7115377	7115378	B0280.8	2.60804	4.53471e-05	0.00648501	-	nhr-10	WBGene00003609	III	7116629	7116931	1.59652e-07	1252	-1252
I	4178812	4178813	R12E2.2	2.60767	9.9407e-05	0.00885645	+		WBGene00020031	I	4178511	4178719	0.000209292	-94	-94
I	9016790	9016791	F36F2.2	2.60537	0.00408354	0.0472238	+		WBGene00009476	I	9016323	9016494	0.000800137	-297	-297
V	6276423	6276424	F31F7.1	2.60506	0.000218594	0.0117262	+		WBGene00017964	V	6276300	6276456	0.0093324	0	0
II	6324452	6324453	C32D5.2	2.59064	0.000162584	0.0106008	+	sma-6	WBGene00004860	II	6322391	6322770	3.12584e-05	-1683	-1683
I	7853743	7853744	R11A5.1	2.57943	6.27948e-05	0.00739964	+	apb-3	WBGene00000163	I	7849523	7849672	0.000516104	-4072	-4072
I	6800385	6800386	E02D9.1	2.57782	0.000737277	0.0206226	+		WBGene00017098	I	6799427	6799821	4.39866e-10	-565	-565
II	6594222	6594223	C56C10.10	2.56451	0.000183956	0.0110774	-		WBGene00016966	II	6592604	6592838	3.68016e-08	-1385	1385
V	7847144	7847145	C37C3.8	2.56379	1.90311e-05	0.0047962	-	tag-253	WBGene00016500	V	7848345	7848569	0.00013109	1201	-1201
IV	8739382	8739383	F21D5.5	2.55918	0.00029106	0.0137767	-		WBGene00009010	IV	8737340	8737666	3.53222e-10	-1717	1717
I	5511691	5511692	F59A3.6	2.55647	2.86914e-05	0.00536481	-		WBGene00019079	I	5512401	5512401	0.00241725	709	-709
I	11675932	11675933	F11A6.1	2.55554	0.000365557	0.0153731	+	kpc-1	WBGene00002232	I	11671947	11672126	0.00363952	-3807	-3807
II	7104958	7104959	F10E7.8	2.5543	1.05456e-05	0.00402371	-		WBGene00017349	II	7105001	7105291	3.71009e-14	43	-43
IV	7782486	7782487	C33H5.9	2.54465	0.000545943	0.0182261	-	sec-10	WBGene00016376	IV	7784120	7784335	0.00172242	1634	-1634
X	9635589	9635590	F34H10.3	2.5431	1.92221e-05	0.0047962	-		WBGene00009380	X	9637007	9638104	1.20337e-30	1418	-1418
X	10251294	10251295	C14H10.2	2.54058	9.32923e-05	0.00863058	-		WBGene00007592	X	10251333	10251605	1.59879e-07	39	-39
X	6597083	6597084	T28B4.3	2.53331	0.000453949	0.0167667	-	ttr-6	WBGene00020886	X	6597074	6597477	3.46849e-41	0	0
II	4505143	4505144	T05C1.4	2.52896	7.68475e-05	0.00819491	-		WBGene00020251	II	4506519	4506924	4.92291e-23	1376	-1376
III	6087403	6087404	C05D10.3	2.52805	4.61475e-05	0.00648501	-	wht-1	WBGene00015479	III	6083016	6083498	0.00826975	-3906	3906
X	514533	514534	B0310.3	2.52245	6.37599e-05	0.00741824	-		WBGene00015139	X	517996	518209	1.58715e-06	3463	-3463
III	6159790	6159791	F42A10.2	2.51924	0.000121674	0.00946007	+	nfm-1	WBGene00003593	III	6158630	6159539	2.46149e-55	-252	-252
III	8229654	8229655	C02F5.7	2.51066	1.89551e-05	0.0047962	+		WBGene00015350	III	8227388	8227850	1.71417e-12	-1805	-1805
V	10581864	10581865	T21C9.6	2.5066	0.000885779	0.0222428	+		WBGene00011893	V	10578988	10579223	3.41928e-08	-2642	-2642
IV	3384143	3384144	B0546.4	2.50203	0.000295964	0.0138637	-		WBGene00015251	IV	3384602	3384954	1.02189e-14	459	-459
V	12810053	12810054	ZC443.1	2.50065	0.0036107	0.0442988	-		WBGene00013896	V	12811314	12811526	0.00448216	1261	-1261
V	11570418	11570419	H12C20.6	2.49524	4.6065e-05	0.00648501	+	nhr-101	WBGene00003691	V	11570342	11570526	0.000167752	0	0
I	9881494	9881495	T23H4.2	2.49279	0.000417478	0.0161938	-	nhr-69	WBGene00003659	I	9883765	9883999	8.65471e-07	2271	-2271
V	15052508	15052509	C25D7.4	2.4861	0.000933867	0.0228666	-	fbxa-82	WBGene00007716	V	15054778	15055062	0.000491115	2270	-2270
X	14558432	14558433	H01A20.1	2.48551	1.1469e-05	0.00402371	+	nhr-3	WBGene00003602	X	14558551	14558960	6.02156e-05	119	119
IV	274570	274571	T21D12.9	2.48041	1.19028e-05	0.00402371	+		WBGene00020649	IV	278000	278417	0.000113379	3430	3430
I	9747944	9747945	K02A11.3	2.4727	0.000133805	0.00981783	-		WBGene00010488	I	9747896	9748304	1.90798e-08	0	0
III	11033073	11033074	Y48A6B.9	2.46825	0.000316563	0.0143906	+		WBGene00012970	III	11035414	11035606	0.00318495	2341	2341
III	7913534	7913535	ZK688.12	2.46216	0.000357392	0.0151294	-		WBGene00044763	III	7911631	7911872	2.4625e-05	-1663	1663
X	7954307	7954308	C14F5.1	2.45425	0.000310463	0.0142219	+	dct-1	WBGene00015776	X	7954283	7954748	7.63695e-22	0	0
X	7437935	7437936	C01C10.2	2.44687	0.000730307	0.0206156	-		WBGene00015294	X	7442682	7443075	2.5216e-14	4747	-4747
V	8014161	8014162	Y97E10AR.6	2.44446	6.48744e-05	0.00748869	-		WBGene00022401	V	8014040	8014362	4.1418e-07	0	0
X	6904696	6904697	F14B8.2	2.43961	0.000630942	0.0194494	+		WBGene00017445	X	6904527	6904861	3.79288e-15	0	0
III	4419820	4419821	R07E5.8	2.43507	0.000249957	0.0125394	+	cku-80	WBGene00000520	III	4419396	4419606	1.4899e-06	-215	-215
II	7877943	7877944	T01H3.2	2.42683	0.000583504	0.0188136	-		WBGene00011348	II	7880194	7880383	0.000600395	2251	-2251
V	2278244	2278245	T27B7.1	2.42311	7.08374e-05	0.00781803	-	nhr-59	WBGene00003649	V	2278631	2278895	3.68127e-08	387	-387
I	7683335	7683336	T23G11.5	2.41929	0.0002165	0.0117139	+	rlbp-1	WBGene00011970	I	7679231	7679236	0.00747286	-4100	-4100
I	7094746	7094747	F22D6.5	2.40464	0.000608107	0.0192814	-	prpf-4	WBGene00004186	I	7094976	7095142	0.000559946	230	-230
IV	9045336	9045337	Y73F4A.1	2.40393	0.000135294	0.00981783	-		WBGene00013514	IV	9047003	9047348	1.37468e-07	1667	-1667
V	2236029	2236030	F44C8.1	2.40049	9.68681e-06	0.0039848	+	cyp-33C4	WBGene00018413	V	2235945	2236139	0.00845449	0	0
I	2818768	2818769	W03D8.11	2.39659	0.00010482	0.00894117	+		WBGene00044796	I	2818099	2818191	0.00244029	-578	-578
III	8108724	8108725	C14B9.3	2.39593	6.59631e-05	0.00757571	+		WBGene00015753	III	8109426	8109755	8.77811e-10	702	702
V	10248880	10248881	C12D8.10	2.38985	1.17966e-05	0.00402371	+	akt-1	WBGene00000102	V	10247750	10247945	0.00698262	-936	-936
IV	14837134	14837135	Y57G11C.22	2.38932	4.2201e-05	0.00633951	+		WBGene00013317	IV	14836900	14837183	0.000177256	0	0
II	4433403	4433404	T12C9.5	2.38837	0.000108771	0.00902667	+	nhr-109	WBGene00003699	II	4433718	4433818	0.00318979	315	315
I	9699545	9699546	C04F12.8	2.38059	0.000331236	0.014675	-		WBGene00007302	I	9700904	9701039	0.00808762	1359	-1359
V	12101267	12101268	C13C4.2	2.37242	0.00134258	0.0269768	+	nhr-154	WBGene00007547	V	12098084	12098191	0.00145945	-3077	-3077
I	9132531	9132532	ZK858.4	2.3719	0.000153792	0.0103407	+	mel-26	WBGene00003209	I	9131885	9132181	7.72306e-12	-351	-351
V	11446634	11446635	F57B7.4	2.36407	0.00322111	0.0416973	+	mig-17	WBGene00003248	V	11446394	11446755	1.07774e-31	0	0
V	9173000	9173001	B0222.9	2.36385	5.26262e-06	0.00258841	-		WBGene00015057	V	9175086	9175522	0.000405892	2086	-2086
IV	10904335	10904336	ZK596.3	2.36063	0.000198671	0.0112374	-		WBGene00014008	IV	10907079	10907321	2.42115e-08	2744	-2744
I	10806911	10806912	C35E7.9	2.35597	0.00434675	0.0488372	+		WBGene00016461	I	10807105	10807368	0.00851522	194	194
II	8008568	8008569	DH11.1	2.35383	0.00177192	0.0308857	+	DH11.1	WBGene00008435	II	8012132	8012319	0.00130136	3564	3564
III	3719654	3719655	C14B1.8	2.35283	0.000227862	0.0119062	-		WBGene00007579	III	3719703	3719785	0.00744975	49	-49
X	9837980	9837981	F47A4.5	2.35072	3.50441e-05	0.0059669	-		WBGene00009801	X	9838120	9838393	2.31486e-07	140	-140
II	6324452	6324453	C32D5.2	2.34435	0.000162584	0.0106008	+	sma-6	WBGene00004860	II	6322391	6322770	3.12584e-05	-1683	-1683
I	3338369	3338370	Y44E3A.1	2.34103	0.000820214	0.0215906	+		WBGene00021547	I	3338266	3338687	8.72793e-41	0	0
V	10256335	10256336	Y22F5A.1	2.34008	0.000631335	0.0194494	+	nhr-232	WBGene00012494	V	10256748	10256812	0.00345345	413	413
I	8947189	8947190	F53B6.8	2.33098	0.000722798	0.020524	-	fipr-26	WBGene00009963	I	8943648	8943706	0.00845516	-3484	3484
X	4265858	4265859	C52B9.3	2.32351	3.68919e-05	0.00611421	+		WBGene00016866	X	4265421	4266629	2.99134e-37	0	0
V	10248880	10248881	C12D8.10	2.32307	1.17966e-05	0.00402371	+	akt-1	WBGene00000102	V	10247750	10247945	0.00698262	-936	-936
IV	6093635	6093636	K08B4.6	2.31106	0.000404239	0.0160455	-	cpi-1	WBGene00000535	IV	6095048	6095194	0.00145503	1413	-1413
IV	10701349	10701350	R102.6	2.30635	6.34371e-05	0.00741824	-		WBGene00011293	IV	10697116	10697866	2.36955e-42	-3484	3484
V	13565849	13565850	C50B8.1	2.305	3.9577e-05	0.00626175	+		WBGene00008224	V	13565285	13565581	1.39815e-15	-269	-269
V	20544160	20544161	Y38H6C.17	2.30378	0.000152108	0.0103407	-		WBGene00012629	V	20544730	20544762	0.000103887	570	-570
X	6809065	6809066	M03A8.2	2.29996	8.1803e-05	0.00827413	+		WBGene00019748	X	6807952	6809022	5.98154e-43	-44	-44
X	8761527	8761528	M02D8.5	2.29896	0.00108193	0.0244297	-		WBGene00019731	X	8761012	8761304	0.000547213	-224	224
IV	8773181	8773182	F20C5.6	2.29333	0.00058553	0.0188176	-		WBGene00008971	IV	8772876	8772935	0.00158104	-247	247
V	13627559	13627560	F53F4.14	2.28635	0.00129903	0.0264542	+		WBGene00009996	V	13627287	13627567	1.7216e-05	0	0
X	8231879	8231880	K02A6.3	2.27939	5.17852e-05	0.00670032	-		WBGene00019294	X	8231771	8232197	2.10401e-29	0	0
III	8308419	8308420	F10E9.4	2.27777	0.00115383	0.0249402	+		WBGene00017356	III	8307395	8307621	2.67933e-05	-799	-799
II	5884527	5884528	F55C12.1	2.26363	0.000185988	0.0110774	+		WBGene00018869	II	5886342	5886409	0.00259726	1815	1815
I	5810006	5810007	C32F10.4	2.25584	0.000209859	0.0115806	-		WBGene00016332	I	5807303	5807687	1.77564e-07	-2320	2320
I	7422781	7422782	ZK524.2	2.25213	0.000226628	0.0118967	+	unc-13	WBGene00006752	I	7422613	7422772	0.000999636	-10	-10
III	9103904	9103905	ZK507.4	2.24852	1.05093e-05	0.00402371	+		WBGene00013980	III	9104074	9104398	0.000133245	170	170
III	8628488	8628489	F22B7.6	2.24839	3.50761e-05	0.0059669	-	polk-1	WBGene00017696	III	8628412	8628621	0.000385571	0	0
X	16367157	16367158	W09B12.1	2.24768	7.60474e-05	0.00818081	+	ace-1	WBGene00000035	X	16365154	16365384	0.00137103	-1774	-1774
V	11119688	11119689	H19N07.3	2.24626	8.13485e-05	0.00827413	-		WBGene00010407	V	11119366	11119395	0.00150239	-294	294
I	6294898	6294899	C10G11.5	2.2417	0.000537354	0.0181457	+	pnk-1	WBGene00004068	I	6297021	6297048	0.00100929	2123	2123
V	2231123	2231124	F44C8.2	2.24155	0.000393638	0.0160157	+	nhr-134	WBGene00003724	V	2232444	2232471	0.00805561	1321	1321
II	11814044	11814045	F43G6.8	2.23744	0.000222341	0.0117809	-		WBGene00009660	II	11813798	11814335	3.15772e-10	0	0
I	11675932	11675933	F11A6.1	2.23329	0.000365557	0.0153731	+	kpc-1	WBGene00002232	I	11671947	11672126	0.00363952	-3807	-3807
V	12013585	12013586	F57F5.4	2.23007	0.000194061	0.011137	-	add-2	WBGene00000073	V	12014413	12014414	0.000275338	828	-828
V	12810053	12810054	ZC443.1	2.22507	0.0036107	0.0442988	-		WBGene00013896	V	12811314	12811526	0.00448216	1261	-1261
I	10562957	10562958	F25H2.8	2.22453	2.47986e-05	0.0049652	+	ubc-25	WBGene00006720	I	10562497	10562847	1.14452e-12	-111	-111
II	6303481	6303482	C29F5.1	2.22406	0.000130191	0.00975579	+		WBGene00016210	II	6303190	6303625	2.75944e-21	0	0
V	10084017	10084018	R04B5.4	2.2236	2.0445e-05	0.00481842	-	nhr-12	WBGene00003611	V	10084016	10084312	6.23635e-07	0	0
III	4468847	4468848	F56F3.4	2.22076	0.00152326	0.0285296	+		WBGene00010155	III	4470816	4471137	5.82327e-11	1969	1969
I	9715222	9715223	C16C2.4	2.21923	0.000188816	0.0110774	-		WBGene00007621	I	9719609	9719663	0.00100357	4387	-4387
II	7724850	7724851	B0228.4	2.20983	0.0037662	0.0453246	+	tag-308	WBGene00015061	II	7723712	7724172	2.99018e-06	-679	-679
X	10074231	10074232	ZC373.5	2.20476	2.73094e-05	0.00519224	-		WBGene00013870	X	10071837	10072118	3.15673e-10	-2114	2114
II	11152541	11152542	F40F8.7	2.19375	7.81653e-05	0.00819491	-	pqm-1	WBGene00004096	II	11147622	11147937	3.75895e-06	-4605	4605
V	11201887	11201888	K10D6.4	2.19044	0.000303339	0.0140925	+		WBGene00010744	V	11203912	11203987	0.00216405	2025	2025
I	11675932	11675933	F11A6.1	2.18836	0.000365557	0.0153731	+	kpc-1	WBGene00002232	I	11671947	11672126	0.00363952	-3807	-3807
II	7855068	7855069	T09A5.6	2.18319	0.00116648	0.0249448	-	mdt-10	WBGene00007014	II	7852249	7852825	2.80771e-07	-2244	2244
I	8288118	8288119	T01G9.2	2.1749	3.76372e-05	0.00611421	-		WBGene00011344	I	8288686	8289287	2.9503e-32	568	-568
I	3662161	3662162	T28F2.7	2.17469	0.000379083	0.015651	-		WBGene00020903	I	3663101	3663132	0.00241928	940	-940
X	5805888	5805889	F13D11.3	2.17081	0.00106714	0.0241933	-		WBGene00017428	X	5806079	5806516	7.27637e-31	191	-191
II	6323046	6323047	C32D5.4	2.16015	0.000857008	0.0218476	-		WBGene00016312	II	6322391	6322770	3.12584e-05	-277	277
III	8992148	8992149	R08D7.7	2.15633	0.000508375	0.0177129	+		WBGene00011147	III	8990734	8990899	0.00124017	-1250	-1250
III	6608351	6608352	F20H11.4	2.15121	0.000999961	0.0235254	+		WBGene00017647	III	6608110	6608445	1.95955e-11	0	0
III	1315209	1315210	Y82E9BL.14	2.13638	4.25892e-05	0.00633951	-	fbxa-80	WBGene00022330	III	1309940	1310782	0.000134739	-4428	4428
V	5019209	5019210	K11D12.3	2.129	0.00372834	0.0450434	+	srr-4	WBGene00005655	V	5018925	5019124	0.000104842	-86	-86
V	17376711	17376712	Y20C6A.1	2.12894	9.66111e-05	0.00873778	-		WBGene00012491	V	17380075	17380076	0.00863277	3364	-3364
I	10562957	10562958	F25H2.8	2.1284	2.47986e-05	0.0049652	+	ubc-25	WBGene00006720	I	10562497	10562847	1.14452e-12	-111	-111
I	4792501	4792502	F54D7.4	2.12818	2.27998e-05	0.00485492	-	zig-7	WBGene00006984	I	4792469	4792842	4.7379e-20	0	0
IV	8115754	8115755	F42G8.9	2.12464	0.000959262	0.0230444	+		WBGene00018360	IV	8113282	8113403	0.000416085	-2352	-2352
V	12345899	12345900	F23H12.1	2.11991	0.000624302	0.0194004	-	snb-2	WBGene00004898	V	12343613	12343866	8.26913e-11	-2034	2034
IV	2601139	2601140	Y69A2AR.7	2.11956	4.3957e-05	0.00637518	+		WBGene00022078	IV	2602037	2602316	7.06934e-12	898	898
IV	9032635	9032636	C53D6.6	2.11163	0.000263914	0.0129783	-		WBGene00008283	IV	9032573	9032862	3.6847e-11	0	0
V	18083444	18083445	Y59A8B.11	2.11155	0.000102251	0.00889782	-	fbxa-106	WBGene00013348	V	18086846	18087113	3.46709e-09	3402	-3402
III	5684052	5684053	F54E7.7	2.10354	0.000196406	0.011137	-	rcn-1	WBGene00004321	III	5684042	5684195	0.000763013	0	0
V	9889815	9889816	C50H2.1	2.10171	7.14777e-06	0.00329225	+	fshr-1	WBGene00008239	V	9886271	9886273	0.00374337	-3543	-3543
V	8936375	8936376	H14N18.1	2.09506	0.00144104	0.0278254	+	unc-23	WBGene00006760	V	8936172	8936527	2.18019e-09	0	0
V	9570268	9570269	F25B3.5	2.09371	0.000705064	0.0204252	-		WBGene00009102	V	9574053	9574227	0.00810935	3785	-3785
V	9112768	9112769	F21C10.7	2.09347	0.000171849	0.0107406	+		WBGene00017657	V	9111930	9112516	2.06024e-24	-253	-253
V	2225426	2225427	F44C8.4	2.08653	0.000112778	0.00906801	+	nhr-103	WBGene00003693	V	2225712	2225871	0.00258953	286	286
I	7683335	7683336	T23G11.5	2.08387	0.0002165	0.0117139	+	rlbp-1	WBGene00011970	I	7679231	7679236	0.00747286	-4100	-4100
IV	2596332	2596333	Y69A2AR.8	2.08175	0.000863823	0.0219843	+		WBGene00022079	IV	2599649	2600009	1.28298e-21	3317	3317
V	2565683	2565684	Y45G12C.1	2.0766	0.00257691	0.0379574	+		WBGene00021565	V	2570498	2570642	0.00101331	4815	4815
V	8184298	8184299	F20D6.3	2.07419	1.32463e-05	0.00431515	+	srp-8	WBGene00005649	V	8182171	8182538	0.00362168	-1761	-1761
I	7968681	7968682	T22C1.11	2.07299	0.000850092	0.0217572	-		WBGene00011920	I	7968705	7969447	2.22279e-09	24	-24
X	8718921	8718922	F53A9.8	2.0677	0.00073778	0.0206226	-		WBGene00018731	X	8723674	8724330	1.60243e-36	4753	-4753
V	18560277	18560278	Y51A2D.11	2.06323	0.00408382	0.0472238	-	ttr-26	WBGene00013079	V	18560161	18560275	0.00748404	-3	3
III	8628488	8628489	F22B7.6	2.06314	3.50761e-05	0.0059669	-	polk-1	WBGene00017696	III	8628412	8628621	0.000385571	0	0
IV	5364259	5364260	F41H10.6	2.05731	0.00187635	0.0317282	-		WBGene00018319	IV	5364139	5364438	0.00569404	0	0
V	11496354	11496355	T11F9.12	2.04696	0.00119639	0.0254142	-		WBGene00011713	V	11496485	11496616	0.00334801	131	-131
V	610471	610472	ZK488.2	2.04196	0.000689351	0.020278	+	nhr-90	WBGene00003680	V	610646	610852	0.00317953	175	175
X	670798	670799	T19D7.6	2.03816	0.00115775	0.0249402	-		WBGene00020574	X	675349	675378	0.00509701	4551	-4551
V	8460397	8460398	T23B12.6	2.03634	4.91844e-05	0.0065846	-		WBGene00020721	V	8459930	8460024	0.0010153	-374	374
IV	8612379	8612380	F42A9.5	2.03603	0.00146731	0.0280628	+	cyp-33E2	WBGene00018334	IV	8608428	8608568	0.000391949	-3812	-3812
V	19014608	19014609	Y39B6A.30	2.03173	0.00159994	0.0292578	+		WBGene00012689	V	19016000	19016199	0.00596511	1392	1392
V	12904081	12904082	R90.2	2.031	0.00311408	0.0411484	-	ttr-27	WBGene00011284	V	12907504	12907914	1.26121e-14	3423	-3423
IV	16736231	16736232	Y51H4A.25	2.02944	0.000586376	0.0188181	+		WBGene00013119	IV	16731421	16731423	0.00239717	-4809	-4809
V	12084296	12084297	R07B7.8	2.02572	0.00213806	0.0342347	-		WBGene00011092	V	12086409	12086729	5.27733e-21	2113	-2113
V	14316608	14316609	F47B8.2	2.02536	0.000439355	0.0165674	-		WBGene00009803	V	14317288	14317437	1.87913e-05	680	-680
I	12232680	12232681	F14B6.6	2.02098	0.0014872	0.0282518	+		WBGene00008787	I	12229258	12229572	0.000342717	-3109	-3109
V	9112768	9112769	F21C10.7	2.01492	0.000171849	0.0107406	+		WBGene00017657	V	9111930	9112516	2.06024e-24	-253	-253
X	1054211	1054212	K03E6.3	2.01152	0.00043545	0.0165026	+	ncs-3	WBGene00003565	X	1054038	1054339	3.82083e-14	0	0
IV	8773181	8773182	F20C5.6	2.01012	0.00058553	0.0188176	-		WBGene00008971	IV	8772876	8772935	0.00158104	-247	247
V	10505827	10505828	C35A5.5	2.00647	0.000290683	0.0137767	+		WBGene00007949	V	10506583	10506688	0.00289591	756	756
II	5873591	5873592	F55C12.5	2.00629	9.04533e-05	0.00860555	-		WBGene00018872	II	5873633	5873980	5.94555e-07	42	-42
III	5573954	5573955	F09F7.1	-2.01592	1.97086e-05	0.0047962	+		WBGene00017299	III	5572840	5573172	8.30211e-09	-783	-783
V	13756397	13756398	F20G2.2	-2.03664	0.000108918	0.00902667	-		WBGene00008986	V	13756827	13757051	2.25974e-09	430	-430
I	12968910	12968911	C47B2.5	-2.03679	0.000312439	0.0142806	+	eif-6	WBGene00001234	I	12968526	12968687	2.23975e-05	-224	-224
II	13957448	13957449	W07G1.3	-2.06766	3.05335e-05	0.00557114	-	zip-3	WBGene00012330	II	13954077	13954265	0.00600655	-3184	3184
IV	9159003	9159004	F23B2.11	-2.07599	0.000239059	0.0122093	-	pcp-3	WBGene00003958	IV	9162914	9162959	0.00240587	3911	-3911
V	18492237	18492238	Y51A2D.19	-2.10796	0.000383135	0.0157608	+	slo-1	WBGene00004830	V	18491910	18492098	0.00699943	-140	-140
IV	1093919	1093920	Y55F3AR.3	-2.12656	0.00461871	0.0499753	-		WBGene00021934	IV	1094196	1094503	1.23321e-14	277	-277
III	10267289	10267290	R01H10.7	-2.12803	0.000133554	0.00981783	-		WBGene00010975	III	10270774	10271068	9.388e-12	3485	-3485
IV	1012652	1012653	Y55F3AM.3	-2.23042	4.66003e-05	0.00650822	+		WBGene00021921	IV	1012480	1012880	1.30735e-10	0	0
II	12627121	12627122	Y38E10A.15	-2.24117	0.00101166	0.0236211	+		WBGene00012593	II	12630315	12630387	0.00463843	3194	3194
V	19697367	19697368	Y43F8C.13	-2.26651	0.000237501	0.0121847	-		WBGene00012834	V	19694908	19694958	0.00671646	-2410	2410
III	542064	542065	T22F7.1	-2.28968	8.12575e-05	0.00827413	+		WBGene00020701	III	544864	545257	0.00100265	2800	2800
V	4826745	4826746	C37H5.8	-2.32392	0.00409328	0.0472238	-	hsp-6	WBGene00002010	V	4827018	4827593	5.58846e-17	273	-273
II	12919508	12919509	F58G1.1	-2.38747	0.00281682	0.0392913	+		WBGene00010263	II	12919229	12919428	0.000559491	-81	-81
X	13841542	13841543	M03B6.1	-2.39089	3.14276e-05	0.00568839	+		WBGene00010833	X	13841265	13841529	1.6318e-05	-14	-14
V	9737567	9737568	F40F9.9	-2.39273	0.00122483	0.0256116	+	aqp-4	WBGene00000172	V	9738422	9738422	0.00806984	854	854
III	2418335	2418336	W04B5.3	-2.40312	0.00040194	0.0160225	+		WBGene00021020	III	2418183	2418522	5.76547e-07	0	0
I	3163690	3163691	Y54E10A.6	-2.44872	0.000578163	0.0187616	+		WBGene00021828	I	3162511	3162790	3.46334e-08	-901	-901
I	7643323	7643324	F26A3.2	-2.48063	0.00271411	0.0386937	-	ncbp-2	WBGene00009141	I	7643194	7643415	1.02075e-06	0	0
II	13715801	13715802	Y54G9A.4	-2.49955	0.000268107	0.0131013	-		WBGene00013207	II	13719830	13720113	0.00516934	4029	-4029
V	5410978	5410979	F08F3.4	-2.5463	0.00063629	0.0194494	+		WBGene00017262	V	5411440	5411655	6.75142e-06	462	462
I	323352	323353	Y48G1A.5	-2.58208	0.00452033	0.0495748	-	imb-5	WBGene00002079	I	323890	323943	0.00145689	538	-538
X	3270850	3270851	K09C4.8	-2.63653	0.0001052	0.00894117	-	sul-1	WBGene00006308	X	3270816	3271086	0.000133311	0	0
IV	13179358	13179359	F09E8.7	-2.65465	1.46888e-06	0.0019574	-	lev-1	WBGene00002974	IV	13179130	13179613	5.36217e-19	0	0
V	281716	281717	Y58G8A.4	-2.66678	0.00129016	0.0264175	-		WBGene00021983	V	281006	281582	5.34923e-19	-135	135
V	3772044	3772045	R08E5.3	-2.67716	9.28716e-06	0.00396457	+		WBGene00019963	V	3771981	3772140	0.00153405	0	0
II	14494438	14494439	K10H10.2	-2.71749	0.00087168	0.022088	-		WBGene00010759	II	14496781	14497294	5.1291e-35	2343	-2343
IV	7237717	7237718	D2024.3	-2.76378	0.000164524	0.0106098	+	elo-3	WBGene00001241	IV	7235332	7235821	1.74469e-27	-1897	-1897
IV	4530319	4530320	ZK185.3	-2.77613	2.98498e-05	0.00549067	-		WBGene00022683	IV	4532280	4532455	0.000966432	1961	-1961
X	16770426	16770427	C10E2.6	-2.81708	0.00342101	0.0429763	-		WBGene00015676	X	16769745	16770410	7.45824e-11	-17	17
II	9161318	9161319	W07A12.7	-2.85676	0.000282366	0.013535	+	rhy-1	WBGene00012324	II	9161113	9161559	0.00658754	0	0
V	3776121	3776122	R08E5.2	-3.00769	1.97148e-05	0.0047962	-		WBGene00019962	V	3775264	3775551	0.00947781	-571	571
IV	12599145	12599146	K08E7.9	-3.17853	0.00311546	0.0411484	-	pgp-1	WBGene00003995	IV	12594563	12594975	1.66315e-08	-4171	4171
X	14515010	14515011	D1025.2	-3.26514	0.000242398	0.012269	-		WBGene00008354	X	14513559	14513751	0.000515679	-1260	1260
V	4617933	4617934	F54D11.2	-3.43087	0.000382621	0.0157608	+		WBGene00018812	V	4617405	4617604	0.000259106	-330	-330
V	8017927	8017928	F43H9.2	-3.5462	0.000101184	0.00889408	+	sptl-2	WBGene00018398	V	8014040	8014362	4.1418e-07	-3566	-3566
X	7305524	7305525	K03A1.5	-3.73951	0.000104297	0.00894117	-	sur-5	WBGene00006351	X	7305666	7306116	2.35194e-08	142	-142
X	7305524	7305525	K03A1.5	-4.40769	0.000104297	0.00894117	-	sur-5	WBGene00006351	X	7305666	7306116	2.35194e-08	142	-142
X	978441	978442	C44C1.5	-4.79619	0.000144529	0.0101552	-		WBGene00016644	X	974735	974987	0.00636862	-3455	3455
III	9324965	9324966	C40H1.7	-7.61937	0.00160915	0.0293132	+		WBGene00008042	III	9328374	9328995	1.9448e-13	3409	3409

## Sheet: crh-1 binding motifs within 5kb
chr	TSS_start	TSS_stop	Seq	FC( lev/mock)	p-value	adjusted.pvalue (FDR)	strand	Name	ID	CREBmotif_chr	CREBmotif_start	CREBmotif_stop	motif_pvalue	dist (genomic)	distance (up_or_downstream)
IV	11745617	11745618	T12A7.1	32.3436	6.56705e-08	0.00144395	+	gem-4	WBGene00001577	IV	11746101	11746112	2.42e-05	484	484
III	5267770	5267771	ZC395.5	12.4407	0.000223876	0.011807	+		WBGene00022597	III	5267242	5267253	3.53e-05	-518	-518
V	16069218	16069219	F14H3.10	10.3258	0.000957179	0.0230444	+	cyp-35D1	WBGene00008829	V	16070141	16070152	6.61e-05	923	923
II	3898137	3898138	F53C3.6	10.3108	1.41248e-06	0.0019574	+		WBGene00018750	II	3897988	3897999	2.3e-05	-139	-139
II	5447662	5447663	F56D1.6	10.0468	1.48858e-05	0.00449055	+	cex-1	WBGene00023407	II	5449819	5449830	8.08e-05	2157	2157
I	9018718	9018719	F36F2.1	9.92672	3.77025e-06	0.00242182	+		WBGene00009475	I	9017507	9017518	5.52e-05	-1201	-1201
II	3899853	3899854	F53C3.5	9.872	1.98984e-06	0.0019574	+		WBGene00018749	II	3899348	3899359	3.53e-05	-495	-495
IV	13609859	13609860	C08F11.13	9.19975	2.92009e-07	0.00144695	-		WBGene00007460	IV	13610547	13610558	1.92e-05	688	-688
V	12814106	12814107	ZC443.3	8.56182	9.66971e-07	0.00182314	-		WBGene00013898	V	12814418	12814429	8.27e-05	312	-312
II	5698938	5698939	C25H3.10	8.53547	1.10637e-05	0.00402371	-		WBGene00016119	II	5697266	5697277	5.68e-07	-1662	1662
IV	13609859	13609860	C08F11.13	8.2367	2.92009e-07	0.00144695	-		WBGene00007460	IV	13610547	13610558	1.92e-05	688	-688
V	13417590	13417591	F53F1.6	7.66685	1.80359e-05	0.0047962	-		WBGene00009984	V	13420102	13420113	9.03e-05	2512	-2512
III	8324613	8324614	F10E9.12	7.25352	4.62365e-06	0.00242182	+		WBGene00017361	III	8326430	8326441	6.11e-05	1817	1817
V	7547992	7547993	C54F6.14	7.15195	3.83743e-05	0.00611421	-	ftn-1	WBGene00001500	V	7545147	7545158	2.3e-05	-2835	2835
III	9690168	9690169	C07A9.8	7.034	7.82365e-05	0.00819491	-		WBGene00007404	III	9690721	9690732	1.19e-05	553	-553
V	5753515	5753516	K09H11.7	6.85623	1.91462e-07	0.00144395	-		WBGene00019604	V	5750628	5750639	8.74e-05	-2877	2877
V	13909498	13909499	C06B3.6	6.63126	4.38802e-06	0.00242182	-		WBGene00007365	V	13909470	13909481	2.47e-06	-18	18
V	12814106	12814107	ZC443.3	6.63104	9.66971e-07	0.00182314	-		WBGene00013898	V	12814418	12814429	8.27e-05	312	-312
X	5647346	5647347	T22B7.3	6.44592	1.74174e-05	0.0047962	+		WBGene00020672	X	5648452	5648463	1.84e-05	1106	1106
III	5552074	5552075	F09F7.6	6.36306	3.19768e-07	0.00144695	-		WBGene00017303	III	5553359	5553370	2.48e-07	1285	-1285
V	5177239	5177240	C03A7.11	6.23213	5.78974e-05	0.00709118	-	ugt-51	WBGene00015369	V	5176731	5176742	9.19e-05	-498	498
X	5647346	5647347	T22B7.3	6.17747	1.74174e-05	0.0047962	+		WBGene00020672	X	5648452	5648463	1.84e-05	1106	1106
IV	12527316	12527317	F53B2.8	6.09754	5.48672e-05	0.0068965	-		WBGene00009957	IV	12525445	12525456	2.93e-05	-1861	1861
V	4041988	4041989	C49G7.10	6.07906	0.000157863	0.0104434	-		WBGene00016788	V	4038713	4038724	3.76e-05	-3265	3265
V	17322418	17322419	F31E9.1	5.94833	5.59333e-05	0.00699166	-	fbxa-180	WBGene00009295	V	17320536	17320547	8.34e-05	-1872	1872
V	5087105	5087106	Y58A7A.5	5.88259	7.55399e-05	0.00818081	-		WBGene00021979	V	5088442	5088453	1.48e-05	1337	-1337
II	8485887	8485888	M05D6.7	5.66633	2.71876e-05	0.00519224	+	gbh-2	WBGene00001523	II	8488468	8488479	2.63e-05	2581	2581
IV	11067050	11067051	Y5F2A.2	5.64893	3.26625e-06	0.00241067	-	ttr-17	WBGene00012383	IV	11065640	11065651	7.35e-05	-1400	1400
V	10938820	10938821	F17C11.11	5.64526	6.73203e-05	0.00765388	-		WBGene00008922	V	10940923	10940934	1.11e-05	2103	-2103
I	14157616	14157617	C37A5.8	5.62214	0.00051288	0.01773	+	fipr-24	WBGene00007992	I	14159417	14159428	2.68e-06	1801	1801
V	5845703	5845704	F26F12.3	5.59319	7.29424e-07	0.00182314	-		WBGene00017834	V	5844520	5844531	9.37e-05	-1173	1173
V	11096079	11096080	Y42A5A.3	5.56878	0.000123784	0.00952592	-		WBGene00012778	V	11094865	11094876	7.57e-05	-1204	1204
V	462601	462602	M02H5.4	5.56479	4.70453e-05	0.00653006	+	nhr-202	WBGene00019742	V	466245	466256	1.03e-05	3644	3644
V	5845703	5845704	F26F12.3	5.55267	7.29424e-07	0.00182314	-		WBGene00017834	V	5844520	5844531	9.37e-05	-1173	1173
V	13909734	13909735	C06B3.7	5.50424	0.000113826	0.00906801	+		WBGene00007366	V	13909470	13909481	2.47e-06	-254	-254
V	6997095	6997096	C33G8.11	5.45363	1.06507e-05	0.00402371	-	nhr-107	WBGene00003697	V	6994089	6994100	6e-05	-2996	2996
V	18931351	18931352	Y80D3A.7	5.44654	0.000128605	0.00970285	-	ptr-22	WBGene00004236	V	18931046	18931057	3.26e-05	-295	295
I	8785408	8785409	DY3.6	5.19623	2.33619e-05	0.00485492	-	mfb-1	WBGene00008439	I	8784123	8784134	3.64e-05	-1275	1275
X	1336909	1336910	F21E9.3	5.10144	4.56346e-06	0.00242182	-	ttr-37	WBGene00017667	X	1335772	1335783	6.14e-05	-1127	1127
V	14160846	14160847	T02B5.3	5.08722	9.26875e-05	0.00863058	-		WBGene00011364	V	14162778	14162789	3.54e-06	1932	-1932
I	13842726	13842727	W04A8.4	4.98771	0.000959866	0.0230444	-		WBGene00012239	I	13841079	13841090	8.74e-05	-1637	1637
X	9264273	9264274	F18G5.6	4.86879	1.34849e-05	0.00431515	-		WBGene00017582	X	9264807	9264818	4.33e-05	534	-534
V	10493383	10493384	C35A5.2	4.86833	1.41184e-05	0.0043166	+	ugt-33	WBGene00007946	V	10495717	10495728	8.5e-06	2334	2334
I	7170024	7170025	K07G5.5	4.85302	6.78581e-05	0.00765682	+		WBGene00010644	I	7171428	7171439	8.69e-05	1404	1404
IV	6802314	6802315	C17H12.4	4.8366	6.76315e-06	0.00325566	-		WBGene00015930	IV	6803405	6803416	1.23e-06	1091	-1091
I	7490169	7490170	T28F4.4	4.80855	4.1786e-07	0.00157568	-		WBGene00012139	I	7489555	7489566	8.9e-05	-604	604
V	5080880	5080881	Y58A7A.3	4.75721	3.29029e-05	0.00572636	-		WBGene00021977	V	5077550	5077561	8.84e-05	-3320	3320
II	8012765	8012766	DH11.2	4.68	0.000232407	0.0119777	+	DH11.2	WBGene00008436	II	8016225	8016236	8.57e-05	3460	3460
V	5845703	5845704	F26F12.3	4.67831	7.29424e-07	0.00182314	-		WBGene00017834	V	5844520	5844531	9.37e-05	-1173	1173
V	12792947	12792948	ZC455.6	4.63141	4.23848e-05	0.00633951	-	ugt-5	WBGene00013906	V	12794714	12794725	2.47e-05	1767	-1767
IV	3606791	3606792	ZC416.4	4.62915	3.2493e-05	0.00572636	+	kgb-2	WBGene00002188	IV	3605257	3605268	5.31e-05	-1524	-1524
V	3970498	3970499	B0213.15	4.62618	0.000147534	0.0102391	-	cyp-34A9	WBGene00015044	V	3971876	3971887	2.01e-05	1378	-1378
IV	6248512	6248513	F58F9.7	4.6229	0.00109471	0.0245328	-		WBGene00019060	IV	6249783	6249794	5.95e-05	1271	-1271
V	3939112	3939113	K07C6.4	4.60377	4.27864e-05	0.00633951	+	cyp-35B1	WBGene00019472	V	3942459	3942470	2.21e-05	3347	3347
IV	11749197	11749198	T12A7.6	4.60322	2.32174e-05	0.00485492	+		WBGene00011727	IV	11748943	11748954	5.82e-05	-244	-244
V	1447222	1447223	R09B5.9	4.54897	0.000264496	0.0129783	+	cnc-4	WBGene00000558	V	1447172	1447183	5.34e-05	-40	-40
IV	7897530	7897531	C55F2.2	4.50458	1.03154e-05	0.00402371	-	ilys-4	WBGene00016958	IV	7897631	7897642	6.87e-05	101	-101
III	12107664	12107665	Y75B8A.4	4.49543	0.00102194	0.0236416	+		WBGene00013541	III	12112190	12112201	2.2e-05	4526	4526
V	6998801	6998802	C33G8.6	4.48976	1.68347e-05	0.0047962	+	nhr-42	WBGene00003632	V	7003455	7003466	8.11e-05	4654	4654
IV	10761620	10761621	T25B9.7	4.43312	0.000275778	0.0133038	+	ugt-54	WBGene00012013	IV	10763892	10763903	6.46e-05	2272	2272
IV	7017615	7017616	C06G3.6	4.41896	8.24127e-05	0.00827413	+		WBGene00015552	IV	7015829	7015840	7.72e-05	-1776	-1776
V	4042389	4042390	C49G7.5	4.40372	0.000101815	0.00889408	+		WBGene00016783	V	4038713	4038724	3.76e-05	-3666	-3666
V	19445547	19445548	M04C3.1	4.32709	1.49606e-07	0.00144395	-		WBGene00010850	V	19443757	19443768	1.12e-05	-1780	1780
V	3851783	3851784	F47C10.2	4.32407	0.000461406	0.0167714	-	btb-21	WBGene00018540	V	3852365	3852376	7.92e-05	582	-582
V	16278171	16278172	F28G4.1	4.31014	0.000474858	0.0170224	+	cyp-37B1	WBGene00009226	V	16273526	16273537	1.12e-05	-4635	-4635
V	3984398	3984399	B0213.4	4.28088	0.000715093	0.0205057	+	nlp-29	WBGene00003767	V	3980925	3980936	4.59e-05	-3463	-3463
IV	274570	274571	T21D12.9	4.24013	1.19028e-05	0.00402371	+		WBGene00020649	IV	271393	271404	2.21e-05	-3167	-3167
IV	2771787	2771788	Y54G2A.11	4.22349	2.21517e-06	0.00200473	-		WBGene00021876	IV	2770768	2770779	2.26e-05	-1009	1009
IV	4294870	4294871	F15E6.3	4.17692	1.96758e-06	0.0019574	+		WBGene00017484	IV	4291306	4291317	3.17e-05	-3554	-3554
V	10357879	10357880	K07C5.5	4.17576	0.000513289	0.01773	-		WBGene00010628	V	10358277	10358288	6.92e-05	398	-398
V	1624432	1624433	Y46H3D.5	4.17201	6.39362e-05	0.00741824	-	nhr-110	WBGene00003700	V	1623560	1623571	5.52e-05	-862	862
V	1621535	1621536	F16B4.12	4.1602	4.21843e-05	0.00633951	-	nhr-117	WBGene00003707	V	1621556	1621567	6.92e-05	21	-21
X	6235504	6235505	C14F11.5	4.15182	0.000322058	0.0143906	-	hsp-43	WBGene00002024	X	6234884	6234895	4.48e-05	-610	610
V	15815639	15815640	F54B8.3	4.13412	2.95727e-06	0.00241067	-	fbxa-69	WBGene00010018	V	15814713	15814724	8.16e-05	-916	916
V	13572074	13572075	C50B8.4	4.10567	2.13016e-05	0.0048191	+		WBGene00008226	V	13572288	13572299	5.16e-05	214	214
V	474810	474811	M02H5.1	4.08017	0.000420694	0.0161938	+	nhr-99	WBGene00003689	V	474221	474232	8.37e-05	-579	-579
X	4920947	4920948	K05B2.4	4.07876	0.000213313	0.0116857	-		WBGene00019404	X	4916470	4916481	7.52e-05	-4467	4467
I	7574191	7574192	D2030.2	4.06818	1.19155e-05	0.00402371	+		WBGene00008412	I	7574674	7574685	3.82e-05	483	483
V	14322907	14322908	F47B8.3	4.06547	9.55949e-05	0.00873778	-		WBGene00009804	V	14319271	14319282	6.89e-05	-3626	3626
V	3942200	3942201	K07C6.3	4.04725	0.00110113	0.0245328	+	cyp-35B2	WBGene00019471	V	3942459	3942470	2.21e-05	259	259
II	7165799	7165800	C27H5.4	4.0361	5.14251e-05	0.00670032	-		WBGene00016174	II	7169469	7169480	6.46e-05	3670	-3670
I	6989066	6989067	C30F12.6	4.03427	2.3333e-05	0.00485492	+		WBGene00016265	I	6989095	6989106	8.5e-06	29	29
X	10218699	10218700	F44A6.5	4.01317	0.000189054	0.0110774	-		WBGene00009677	X	10217101	10217112	3.82e-06	-1588	1588
IV	5340882	5340883	Y4C6B.2	4.00442	0.000635557	0.0194494	+		WBGene00021156	IV	5340440	5340451	4.31e-05	-432	-432
III	8158179	8158180	D2007.5	4.00207	4.36422e-05	0.00637035	-		WBGene00017045	III	8158150	8158161	2.77e-05	-19	19
II	6333954	6333955	C32D5.6	3.97623	2.33894e-05	0.00485492	-		WBGene00016314	II	6337478	6337489	1.97e-06	3524	-3524
V	12053933	12053934	F10C2.7	3.95948	0.000558347	0.0184149	+		WBGene00008647	V	12052556	12052567	6.31e-05	-1367	-1367
IV	10239091	10239092	F01G10.2	3.93047	0.00234103	0.0360426	-	ech-8	WBGene00001157	IV	10242188	10242199	4.68e-06	3097	-3097
V	8603542	8603543	F41E6.5	3.91551	8.3512e-06	0.00363357	+		WBGene00018286	V	8605536	8605547	5.71e-05	1994	1994
V	18579755	18579756	Y51A2D.13	3.91493	0.000113579	0.00906801	-		WBGene00013080	V	18578461	18578472	7.6e-05	-1284	1284
II	2335938	2335939	F43C11.7	3.88933	4.04616e-06	0.00242182	+		WBGene00018384	II	2335720	2335731	1.88e-06	-208	-208
II	8003100	8003101	DH11.3	3.88438	0.00250254	0.0373237	-	pgp-11	WBGene00004005	II	8003795	8003806	4.31e-05	695	-695
I	9760808	9760809	F26E4.2	3.80669	0.000170548	0.0107406	-		WBGene00009157	I	9756001	9756012	3.68e-05	-4797	4797
V	20903946	20903947	F25C8.4	3.80446	8.58903e-05	0.008449	+		WBGene00009106	V	20903318	20903329	8.94e-05	-618	-618
V	15659047	15659048	F53E4.1	3.7754	8.85828e-07	0.00182314	-		WBGene00009978	V	15655231	15655242	6.11e-06	-3806	3806
V	12513002	12513003	T28H10.3	3.75158	0.000355095	0.0151294	+		WBGene00012144	V	12516401	12516412	2.79e-05	3399	3399
V	15659047	15659048	F53E4.1	3.74864	8.85828e-07	0.00182314	-		WBGene00009978	V	15655231	15655242	6.11e-06	-3806	3806
III	6194507	6194508	C23G10.6	3.73802	1.14024e-06	0.0019574	-		WBGene00016013	III	6194882	6194893	6.52e-05	375	-375
IV	307503	307504	K02D7.5	3.68896	4.36709e-06	0.00242182	+		WBGene00019300	IV	307353	307364	3.21e-05	-140	-140
V	13473569	13473570	T10G3.1	3.68465	2.56132e-05	0.00503162	-		WBGene00011692	V	13473716	13473727	4.51e-05	147	-147
V	6997095	6997096	C33G8.11	3.68157	1.06507e-05	0.00402371	-	nhr-107	WBGene00003697	V	6994089	6994100	6e-05	-2996	2996
IV	11097829	11097830	M7.12	3.65725	0.000179174	0.0110458	-		WBGene00010887	IV	11095214	11095225	3.26e-05	-2605	2605
V	10484716	10484717	Y32F6B.1	3.62101	0.000259321	0.0128384	-		WBGene00012531	V	10486814	10486825	5.71e-05	2098	-2098
I	7492042	7492043	T28F4.5	3.59407	3.67298e-06	0.00242182	+		WBGene00012140	I	7489555	7489566	8.9e-05	-2477	-2477
V	20713889	20713890	Y44A6C.1	3.57689	0.000141651	0.0100252	+		WBGene00012850	V	20714103	20714114	2.56e-05	214	214
I	13392105	13392106	C01A2.4	3.57507	1.38411e-05	0.00431515	+		WBGene00007216	I	13390965	13390976	1.92e-05	-1130	-1130
IV	10935883	10935884	ZK593.6	3.56083	2.26379e-05	0.00485492	-	lgg-2	WBGene00002981	IV	10937446	10937457	7.68e-05	1563	-1563
II	7900596	7900597	ZK675.2	3.55944	0.000205031	0.0114564	+	rev-1	WBGene00014066	II	7903642	7903653	6.43e-05	3046	3046
IV	4152540	4152541	R07C12.1	3.55877	0.000154026	0.0103407	+		WBGene00019931	IV	4155499	4155510	3.82e-06	2959	2959
II	3902862	3902863	F53C3.3	3.5541	1.7889e-05	0.0047962	+		WBGene00018747	II	3905685	3905696	4.47e-05	2823	2823
V	10104920	10104921	C08B6.1	3.53949	5.12295e-05	0.00670032	-	ugt-17	WBGene00007422	V	10101138	10101149	6.7e-05	-3772	3772
IV	6618486	6618487	C01B10.1	3.5393	0.000392811	0.0160157	-	drh-2	WBGene00001091	IV	6618918	6618929	9.84e-05	432	-432
X	8548995	8548996	D2021.4	3.48793	0.00046403	0.0167979	-		WBGene00017048	X	8548392	8548403	1.05e-05	-593	593
III	962293	962294	T12B5.1	3.48734	5.02864e-05	0.00665339	+	fbxa-51	WBGene00020448	III	958729	958740	6.21e-05	-3554	-3554
IV	3028939	3028940	Y54G2A.29	3.48031	0.00183232	0.0313217	-		WBGene00021893	IV	3030475	3030486	2.2e-05	1536	-1536
I	14155485	14155486	C37A5.2	3.47554	0.00050984	0.0177129	+	fipr-22	WBGene00007989	I	14154172	14154183	9.11e-05	-1303	-1303
III	7153707	7153708	K04G7.3	3.45531	2.43949e-06	0.00212282	-	ogt-1	WBGene00003858	III	7155447	7155458	5.28e-06	1740	-1740
II	7155590	7155591	C27H5.2	3.44759	0.000230196	0.0119454	+		WBGene00016172	II	7154306	7154317	6.39e-06	-1274	-1274
II	6695270	6695271	C18H9.5	3.44413	5.33607e-05	0.00674573	-		WBGene00016003	II	6694551	6694562	5.24e-05	-709	709
III	7153707	7153708	K04G7.3	3.43186	2.43949e-06	0.00212282	-	ogt-1	WBGene00003858	III	7155447	7155458	5.28e-06	1740	-1740
IV	13633415	13633416	C08F11.5	3.42573	1.72679e-05	0.0047962	+	fbxa-98	WBGene00007453	IV	13633943	13633954	2.23e-05	528	528
X	9635589	9635590	F34H10.3	3.39388	1.92221e-05	0.0047962	-		WBGene00009380	X	9635959	9635970	6.5e-05	370	-370
V	7781792	7781793	C26F1.2	3.39229	0.00171837	0.0304555	+	cyp-32A1	WBGene00016147	V	7785247	7785258	5.98e-05	3455	3455
II	6347688	6347689	C32D5.9	3.38222	1.44108e-06	0.0019574	-	lgg-1	WBGene00002980	II	6347770	6347781	1.32e-05	82	-82
V	11604544	11604545	F35B12.2	3.37104	0.00105686	0.0240558	-	dhs-20	WBGene00000983	V	11600944	11600955	3.51e-05	-3590	3590
X	4898139	4898140	T07F12.4	3.36096	1.76964e-05	0.0047962	-		WBGene00020324	X	4899843	4899854	1.26e-05	1704	-1704
IV	4294870	4294871	F15E6.3	3.35992	1.96758e-06	0.0019574	+		WBGene00017484	IV	4291306	4291317	3.17e-05	-3554	-3554
IV	17405592	17405593	T02D1.5	3.34699	0.000491909	0.0173729	-	pmp-4	WBGene00004061	IV	17409466	17409477	5.34e-05	3874	-3874
V	6202608	6202609	W06H8.8	3.34027	1.72598e-06	0.0019574	-	ttn-1	WBGene00006436	V	6204569	6204580	4.53e-05	1961	-1961
V	15715624	15715625	Y6E2A.4	3.3216	9.52412e-06	0.0039848	-		WBGene00012398	V	15711464	15711475	7.01e-05	-4150	4150
V	6202608	6202609	W06H8.8	3.30819	1.72598e-06	0.0019574	-	ttn-1	WBGene00006436	V	6204569	6204580	4.53e-05	1961	-1961
V	728310	728311	C05E4.14	3.27122	2.21353e-05	0.00485492	+	srh-2	WBGene00005228	V	733050	733061	1.38e-05	4740	4740
V	8161969	8161970	F20D6.5	3.25863	0.000498221	0.0175035	+		WBGene00017635	V	8161740	8161751	7.33e-05	-219	-219
II	1358013	1358014	C13A10.2	3.25444	0.000150471	0.0102925	-		WBGene00015729	II	1357944	1357955	3.17e-05	-59	59
IV	9371491	9371492	C10C5.2	3.25205	3.78681e-05	0.00611421	+		WBGene00007506	IV	9374661	9374672	4.6e-05	3170	3170
V	8907607	8907608	K06C4.8	3.22553	3.27024e-05	0.00572636	+		WBGene00019444	V	8912400	8912411	1.23e-06	4793	4793
V	12245575	12245576	T04H1.4	3.2098	0.00268132	0.0384441	+	rad-50	WBGene00004296	V	12247040	12247051	4.68e-05	1465	1465
I	4727302	4727303	C10H11.4	3.20858	2.84714e-05	0.00536481	+	ugt-28	WBGene00015693	I	4725319	4725330	5.1e-05	-1973	-1973
I	6558701	6558702	F57B10.6	3.18012	1.36349e-05	0.00431515	+	xpg-1	WBGene00019004	I	6559644	6559655	5.71e-05	943	943
V	12935035	12935036	T16G1.7	3.17114	0.00302062	0.0405908	-		WBGene00011801	V	12934567	12934578	6.89e-05	-458	458
I	11294173	11294174	Y53H1B.2	3.16287	8.14657e-05	0.00827413	-		WBGene00013181	I	11294363	11294374	7.57e-05	190	-190
IV	12150952	12150953	B0001.2	3.16195	0.00188832	0.0318011	-		WBGene00007087	IV	12151364	12151375	3.08e-05	412	-412
IV	8764867	8764868	F20C5.4	3.15705	0.00042229	0.0161938	+		WBGene00008969	IV	8768546	8768557	6.79e-05	3679	3679
V	17899802	17899803	C06H5.2	3.1504	0.000225706	0.0118758	+	fbxa-157	WBGene00007393	V	17899282	17899293	4.48e-05	-510	-510
II	6951257	6951258	F22D3.6	3.13575	0.000732777	0.0206207	-		WBGene00017702	II	6953256	6953267	9.16e-05	1999	-1999
X	3706729	3706730	C01C4.3	3.12524	3.73697e-05	0.00611421	+		WBGene00015293	X	3707321	3707332	7.72e-05	592	592
I	4516083	4516084	Y119C1B.5	3.123	5.33696e-05	0.00674573	-		WBGene00022471	I	4511248	4511259	7.98e-05	-4825	4825
V	9356490	9356491	E02C12.13	3.11913	0.000124803	0.00953942	-	ttr-49	WBGene00023485	V	9360774	9360785	7.72e-05	4284	-4284
II	3225312	3225313	ZC239.16	3.09569	0.000122838	0.00951782	-		WBGene00022574	II	3221767	3221778	9.68e-06	-3535	3535
III	4442053	4442054	C28A5.3	3.09333	0.000373717	0.0155715	+	nex-3	WBGene00003590	III	4441560	4441571	7.15e-05	-483	-483
X	11310157	11310158	F08G12.5	3.08988	0.000521857	0.0178711	-		WBGene00008588	X	11309912	11309923	7.33e-05	-235	235
IV	10935883	10935884	ZK593.6	3.08953	2.26379e-05	0.00485492	-	lgg-2	WBGene00002981	IV	10937446	10937457	7.68e-05	1563	-1563
III	3992154	3992155	C36E8.2	3.05835	0.000108412	0.00902667	-	glb-11	WBGene00007981	III	3988059	3988070	7.82e-05	-4085	4085
IV	7189179	7189180	C42D4.1	3.0346	0.000262905	0.0129783	+		WBGene00016594	IV	7186334	7186345	6.55e-05	-2835	-2835
IV	9043331	9043332	Y73F4A.2	3.02624	0.00452907	0.0495954	-		WBGene00013515	IV	9041415	9041426	1.12e-05	-1906	1906
II	5864173	5864174	F55C12.7	3.01977	0.000821634	0.0215906	+	tag-234	WBGene00018874	II	5864405	5864416	4.63e-05	232	232
II	9427674	9427675	M176.5	3.00796	0.000673096	0.0200482	-		WBGene00010944	II	9428524	9428535	5.05e-05	850	-850
V	17546958	17546959	C18D4.8	3.00042	4.40612e-06	0.00242182	-		WBGene00007677	V	17547603	17547614	6.72e-05	645	-645
I	8133886	8133887	T28B8.1	2.98591	0.000396346	0.0160157	+		WBGene00012113	I	8131486	8131497	4.47e-05	-2390	-2390
III	9914172	9914173	F40F12.7	2.97836	6.98525e-05	0.00778529	+		WBGene00009595	III	9913772	9913783	2.21e-05	-390	-390
I	6941988	6941989	T10B11.5	2.9779	0.000159491	0.0104898	-		WBGene00020401	I	6939138	6939149	6.55e-05	-2840	2840
II	4433403	4433404	T12C9.5	2.95868	0.000108771	0.00902667	+	nhr-109	WBGene00003699	II	4430927	4430938	4.59e-05	-2466	-2466
V	12503780	12503781	T28H10.1	2.95548	0.000221881	0.0117809	+		WBGene00012142	V	12503001	12503012	4.84e-05	-769	-769
II	5864173	5864174	F55C12.7	2.95503	0.000821634	0.0215906	+	tag-234	WBGene00018874	II	5864405	5864416	4.63e-05	232	232
I	8768319	8768320	DY3.4	2.95301	0.000147149	0.0102391	+	trt-1	WBGene00006618	I	8772505	8772516	5.71e-05	4186	4186
X	10533686	10533687	F59F5.2	2.94388	5.92316e-05	0.00720492	+		WBGene00010341	X	10534777	10534788	3.14e-05	1091	1091
IV	10957663	10957664	Y69E1A.5	2.94259	0.00016669	0.0106098	-		WBGene00013477	IV	10957779	10957790	9.05e-05	116	-116
V	728310	728311	C05E4.14	2.91979	2.21353e-05	0.00485492	+	srh-2	WBGene00005228	V	733050	733061	1.38e-05	4740	4740
X	15446661	15446662	R03A10.5	2.90509	0.00137743	0.0273982	+		WBGene00010985	X	15445754	15445765	6.58e-05	-897	-897
V	11147326	11147327	T19C4.7	2.8903	0.000369902	0.0154696	+	nlp-33	WBGene00003771	V	11147212	11147223	2.03e-05	-104	-104
III	12327705	12327706	Y75B8A.29	2.88521	9.98808e-05	0.00886197	+		WBGene00013560	III	12327258	12327269	4.68e-06	-437	-437
V	3200529	3200530	K08D9.4	2.87701	0.000139801	0.00997705	-		WBGene00019525	V	3200632	3200643	6.17e-05	103	-103
V	10297374	10297375	B0024.4	2.87615	0.00447686	0.0493611	+		WBGene00007097	V	10296678	10296689	2.47e-06	-686	-686
III	9743253	9743254	T05G5.1	2.87075	9.65774e-05	0.00873778	-		WBGene00011498	III	9742205	9742216	1.7e-05	-1038	1038
V	14090307	14090308	D1086.5	2.86981	0.0001962	0.011137	-		WBGene00008392	V	14090349	14090360	7.85e-05	42	-42
II	8417612	8417613	F14E5.1	2.86341	0.000983457	0.0233439	+		WBGene00008799	II	8415487	8415498	2.53e-05	-2115	-2115
II	2422212	2422213	F42G2.2	2.85038	7.42121e-06	0.00329225	+		WBGene00018351	II	2422754	2422765	7.77e-05	542	542
V	11046876	11046877	C45B11.3	2.84311	0.00192528	0.0322185	-	dhs-18	WBGene00000981	V	11050779	11050790	4.52e-06	3903	-3903
I	4792501	4792502	F54D7.4	2.81377	2.27998e-05	0.00485492	-	zig-7	WBGene00006984	I	4792684	4792695	6.66e-06	183	-183
IV	13252288	13252289	JC8.8	2.80938	9.94271e-05	0.00885645	-	ttr-51	WBGene00010440	IV	13251906	13251917	2.2e-05	-372	372
V	8026671	8026672	F43H9.4	2.80913	7.04134e-05	0.00780933	+		WBGene00018400	V	8023547	8023558	8.34e-05	-3114	-3114
I	6637429	6637430	D2092.1	2.80832	0.00014023	0.00997705	-		WBGene00017063	I	6640354	6640365	6.7e-05	2925	-2925
X	13269627	13269628	K09A11.3	2.80705	0.000159339	0.0104898	-	cyp-14A2	WBGene00010706	X	13268596	13268607	7.98e-05	-1021	1021
V	14462752	14462753	F08H9.3	2.80426	0.000156844	0.0104193	-		WBGene00008591	V	14462153	14462164	6e-06	-589	589
V	10891010	10891011	F32D8.12	2.80403	9.34582e-05	0.00863058	-		WBGene00009334	V	10887654	10887665	7.03e-05	-3346	3346
II	4678023	4678024	T05A7.1	2.79278	0.000364173	0.0153434	+		WBGene00020219	II	4678482	4678493	8.74e-05	459	459
IV	9728655	9728656	C28D4.1	2.792	7.59029e-05	0.00818081	+	nhr-100	WBGene00003690	IV	9729984	9729995	4.37e-05	1329	1329
V	14171441	14171442	ZC376.3	2.7898	4.70984e-06	0.00242182	-		WBGene00013875	V	14167110	14167121	9.22e-05	-4321	4321
I	9435370	9435371	C17E4.10	2.78563	0.000690124	0.020278	+		WBGene00007647	I	9436278	9436289	9.97e-06	908	908
V	17023449	17023450	F49H6.5	2.77688	0.00125755	0.0260365	+		WBGene00009908	V	17023566	17023577	8.95e-06	117	117
X	9789152	9789153	F36G3.1	2.76802	0.000746005	0.0207096	-		WBGene00009482	X	9790776	9790787	4.78e-05	1624	-1624
I	4178812	4178813	R12E2.2	2.75763	9.9407e-05	0.00885645	+		WBGene00020031	I	4178599	4178610	2.3e-05	-203	-203
V	9095985	9095986	F21C10.10	2.74027	0.000310525	0.0142219	+		WBGene00017659	V	9096196	9096207	9.5e-08	211	211
IV	5364544	5364545	F41H10.4	2.71473	3.81355e-05	0.00611421	+		WBGene00018317	IV	5367201	5367212	5.98e-07	2657	2657
I	10117051	10117052	Y106G6D.8	2.70498	0.000136949	0.00986774	+		WBGene00013704	I	10120253	10120264	3.87e-05	3202	3202
V	8995078	8995079	F59E11.5	2.704	0.000609422	0.0192842	+		WBGene00019111	V	8995765	8995776	7.5e-05	687	687
III	4932152	4932153	C26E6.12	2.70279	0.000234797	0.0120734	-		WBGene00016145	III	4929765	4929776	4.76e-05	-2377	2377
V	9254603	9254604	F07C3.9	2.7025	9.27049e-05	0.00863058	-		WBGene00017197	V	9254579	9254590	2.93e-05	-14	14
II	8566805	8566806	F54C9.3	2.69936	0.00106088	0.0240987	-		WBGene00010041	II	8567321	8567332	3.21e-05	516	-516
V	13259277	13259278	C34D1.4	2.69239	0.000200084	0.011261	-		WBGene00007931	V	13261283	13261294	9.28e-05	2006	-2006
V	17322418	17322419	F31E9.1	2.68543	5.59333e-05	0.00699166	-	fbxa-180	WBGene00009295	V	17320536	17320547	8.34e-05	-1872	1872
V	15924451	15924452	F35E8.12	2.67506	0.000147201	0.0102391	-	nhr-108	WBGene00003698	V	15923022	15923033	1.12e-05	-1419	1419
V	3987885	3987886	B0213.3	2.66107	0.000828204	0.0216126	+	nlp-28	WBGene00003766	V	3990577	3990588	3.27e-05	2692	2692
I	4556811	4556812	Y119C1B.10	2.65963	0.000319655	0.0143906	-		WBGene00022475	I	4555889	4555900	4.52e-06	-912	912
II	7322870	7322871	F21D12.3	2.65623	4.21177e-05	0.00633951	-		WBGene00017663	II	7321872	7321883	1.59e-05	-988	988
X	2319324	2319325	T01B6.3	2.65168	0.00109556	0.0245328	-		WBGene00020135	X	2318158	2318169	7.82e-05	-1156	1156
IV	10250624	10250625	F01G10.8	2.65018	0.000103355	0.00894117	+	daf-14	WBGene00000910	IV	10250851	10250862	5.56e-05	227	227
IV	11259442	11259443	C05C12.3	2.64512	0.00141626	0.0276232	-	gtl-1	WBGene00001795	IV	11260562	11260573	6.46e-05	1120	-1120
III	10330327	10330328	T07C4.9	2.62777	0.000310482	0.0142219	-	nex-2	WBGene00003589	III	10328361	10328372	2.14e-05	-1956	1956
V	10955946	10955947	F17C11.13	2.62486	1.35753e-05	0.00431515	+		WBGene00023503	V	10955808	10955819	4.55e-05	-128	-128
IV	11592834	11592835	F40F11.3	2.62147	0.000633249	0.0194494	-		WBGene00009588	IV	11593756	11593767	4.31e-05	922	-922
III	6897961	6897962	T07E3.4	2.61541	4.54129e-05	0.00648501	+		WBGene00020315	III	6898219	6898230	5.28e-06	258	258
IV	7789495	7789496	C33H5.11	2.61262	0.000846859	0.0217449	-	imp-3	WBGene00016378	IV	7791974	7791985	9.87e-05	2479	-2479
III	7115377	7115378	B0280.8	2.60804	4.53471e-05	0.00648501	-	nhr-10	WBGene00003609	III	7110816	7110827	5.91e-05	-4551	4551
I	4178812	4178813	R12E2.2	2.60767	9.9407e-05	0.00885645	+		WBGene00020031	I	4178599	4178610	2.3e-05	-203	-203
I	9016790	9016791	F36F2.2	2.60537	0.00408354	0.0472238	+		WBGene00009476	I	9017505	9017516	7.5e-05	715	715
V	6276423	6276424	F31F7.1	2.60506	0.000218594	0.0117262	+		WBGene00017964	V	6275376	6275387	6.06e-05	-1037	-1037
II	1609007	1609008	C08E3.5	2.6041	0.000375698	0.0156067	-	fbxa-162	WBGene00015597	II	1609597	1609608	3.8e-05	590	-590
V	12937170	12937171	T16G1.6	2.59225	0.0012047	0.0254142	-		WBGene00011800	V	12936599	12936610	4.35e-05	-561	561
II	6324452	6324453	C32D5.2	2.59064	0.000162584	0.0106008	+	sma-6	WBGene00004860	II	6324131	6324142	9.06e-05	-311	-311
IV	11094981	11094982	M7.8	2.58524	0.000734606	0.0206226	-		WBGene00010884	IV	11095214	11095225	3.26e-05	233	-233
I	6800385	6800386	E02D9.1	2.57782	0.000737277	0.0206226	+		WBGene00017098	I	6799555	6799566	5.69e-05	-820	-820
II	6594222	6594223	C56C10.10	2.56451	0.000183956	0.0110774	-		WBGene00016966	II	6589937	6589948	5.98e-05	-4275	4275
V	7847144	7847145	C37C3.8	2.56379	1.90311e-05	0.0047962	-	tag-253	WBGene00016500	V	7849168	7849179	9.84e-05	2024	-2024
I	5511691	5511692	F59A3.6	2.55647	2.86914e-05	0.00536481	-		WBGene00019079	I	5513927	5513938	6.97e-05	2236	-2236
I	11675932	11675933	F11A6.1	2.55554	0.000365557	0.0153731	+	kpc-1	WBGene00002232	I	11676155	11676166	4.52e-06	223	223
II	7104958	7104959	F10E7.8	2.5543	1.05456e-05	0.00402371	-		WBGene00017349	II	7107431	7107442	5.1e-05	2473	-2473
III	2947	2948	cTel54X.1	2.55014	0.000190049	0.0110774	-	fbxa-6	WBGene00008352	III	1286	1297	4.72e-05	-1651	1651
IV	7782486	7782487	C33H5.9	2.54465	0.000545943	0.0182261	-	sec-10	WBGene00016376	IV	7781037	7781048	9.22e-05	-1439	1439
X	9635589	9635590	F34H10.3	2.5431	1.92221e-05	0.0047962	-		WBGene00009380	X	9635959	9635970	6.5e-05	370	-370
X	10251294	10251295	C14H10.2	2.54058	9.32923e-05	0.00863058	-		WBGene00007592	X	10254132	10254143	3.53e-05	2838	-2838
IV	9245506	9245507	Y11D7A.5	2.53998	0.00357411	0.0440065	-		WBGene00012429	IV	9242905	9242916	4.96e-05	-2591	2591
V	9373565	9373566	E02C12.8	2.53466	0.000541836	0.0182043	-		WBGene00017093	V	9370412	9370423	8.82e-05	-3143	3143
X	6597083	6597084	T28B4.3	2.53331	0.000453949	0.0167667	-	ttr-6	WBGene00020886	X	6597391	6597402	2.75e-05	308	-308
V	4908857	4908858	H23N18.1	2.53024	0.000219234	0.0117262	+	ugt-13	WBGene00019232	V	4910080	4910091	6.7e-05	1223	1223
II	4505143	4505144	T05C1.4	2.52896	7.68475e-05	0.00819491	-		WBGene00020251	II	4505451	4505462	4.53e-05	308	-308
X	514533	514534	B0310.3	2.52245	6.37599e-05	0.00741824	-		WBGene00015139	X	517487	517498	3.63e-06	2954	-2954
III	6159790	6159791	F42A10.2	2.51924	0.000121674	0.00946007	+	nfm-1	WBGene00003593	III	6156711	6156722	6.21e-05	-3069	-3069
III	8229654	8229655	C02F5.7	2.51066	1.89551e-05	0.0047962	+		WBGene00015350	III	8229573	8229584	5.89e-06	-71	-71
V	10581864	10581865	T21C9.6	2.5066	0.000885779	0.0222428	+		WBGene00011893	V	10584531	10584542	4.93e-05	2667	2667
IV	10799634	10799635	C06G8.3	2.50554	2.16055e-05	0.0048191	+		WBGene00014669	IV	10804133	10804144	9.82e-05	4499	4499
IV	3384143	3384144	B0546.4	2.50203	0.000295964	0.0138637	-		WBGene00015251	IV	3380350	3380361	2.2e-05	-3783	3783
V	12810053	12810054	ZC443.1	2.50065	0.0036107	0.0442988	-		WBGene00013896	V	12814418	12814429	8.27e-05	4365	-4365
III	7865221	7865222	C02C2.4	2.49993	0.000350955	0.0150788	-		WBGene00015333	III	7864309	7864320	9.24e-05	-902	902
II	5005085	5005086	F59A6.4	2.49963	0.0031534	0.0413358	+		WBGene00019086	II	5006596	5006607	7.38e-05	1511	1511
II	9197458	9197459	ZK1067.1	2.49578	4.89758e-05	0.0065846	+	let-23	WBGene00002299	II	9197341	9197352	9.16e-05	-107	-107
I	9881494	9881495	T23H4.2	2.49279	0.000417478	0.0161938	-	nhr-69	WBGene00003659	I	9879423	9879434	3.58e-05	-2061	2061
V	15052508	15052509	C25D7.4	2.4861	0.000933867	0.0228666	-	fbxa-82	WBGene00007716	V	15055057	15055068	2.81e-06	2549	-2549
V	12659669	12659670	W05B10.2	2.48603	0.000735256	0.0206226	-		WBGene00012277	V	12659460	12659471	6.35e-05	-199	199
IV	274570	274571	T21D12.9	2.48041	1.19028e-05	0.00402371	+		WBGene00020649	IV	271393	271404	2.21e-05	-3167	-3167
I	9747944	9747945	K02A11.3	2.4727	0.000133805	0.00981783	-		WBGene00010488	I	9749784	9749795	9.47e-05	1840	-1840
III	7913534	7913535	ZK688.12	2.46216	0.000357392	0.0151294	-		WBGene00044763	III	7913253	7913264	5.39e-05	-271	271
V	10756607	10756608	F28H7.6	2.4586	0.000529869	0.0179734	-		WBGene00009239	V	10759017	10759028	5.28e-06	2410	-2410
X	7954307	7954308	C14F5.1	2.45425	0.000310463	0.0142219	+	dct-1	WBGene00015776	X	7954580	7954591	3e-05	273	273
III	13139512	13139513	Y39E4B.9	2.44819	0.000938771	0.0228823	-	bre-2	WBGene00000267	III	13139327	13139338	5.79e-05	-175	175
V	11386680	11386681	F55C10.4	2.44679	7.86268e-05	0.00819784	+		WBGene00010108	V	11390299	11390310	3.22e-06	3619	3619
V	8014161	8014162	Y97E10AR.6	2.44446	6.48744e-05	0.00748869	-		WBGene00022401	V	8015167	8015178	6.55e-07	1006	-1006
V	11093595	11093596	Y42A5A.2	2.43991	0.00409934	0.0472238	-	lact-8	WBGene00012777	V	11094865	11094876	7.57e-05	1270	-1270
X	6904696	6904697	F14B8.2	2.43961	0.000630942	0.0194494	+		WBGene00017445	X	6901175	6901186	6.33e-05	-3511	-3511
I	3294359	3294360	W01B11.6	2.43901	0.000433117	0.0164971	-		WBGene00020917	I	3294189	3294200	2.36e-06	-160	160
III	4419820	4419821	R07E5.8	2.43507	0.000249957	0.0125394	+	cku-80	WBGene00000520	III	4415928	4415939	1.1e-05	-3882	-3882
II	7877943	7877944	T01H3.2	2.42683	0.000583504	0.0188136	-		WBGene00011348	II	7877062	7877073	2.47e-06	-871	871
V	2278244	2278245	T27B7.1	2.42311	7.08374e-05	0.00781803	-	nhr-59	WBGene00003649	V	2274191	2274202	2.83e-05	-4043	4043
V	12121650	12121651	C13C4.6	2.41249	0.000916928	0.0225751	+		WBGene00007550	V	12117834	12117845	9.42e-05	-3806	-3806
I	7094746	7094747	F22D6.5	2.40464	0.000608107	0.0192814	-	prpf-4	WBGene00004186	I	7098613	7098624	7.92e-05	3867	-3867
IV	9045336	9045337	Y73F4A.1	2.40393	0.000135294	0.00981783	-		WBGene00013514	IV	9041415	9041426	1.12e-05	-3911	3911
I	2818768	2818769	W03D8.11	2.39659	0.00010482	0.00894117	+		WBGene00044796	I	2817436	2817447	4.31e-05	-1322	-1322
III	8108724	8108725	C14B9.3	2.39593	6.59631e-05	0.00757571	+		WBGene00015753	III	8110523	8110534	1.05e-05	1799	1799
V	10248880	10248881	C12D8.10	2.38985	1.17966e-05	0.00402371	+	akt-1	WBGene00000102	V	10250374	10250385	6.81e-05	1494	1494
IV	14837134	14837135	Y57G11C.22	2.38932	4.2201e-05	0.00633951	+		WBGene00013317	IV	14839501	14839512	4.22e-05	2367	2367
II	4433403	4433404	T12C9.5	2.38837	0.000108771	0.00902667	+	nhr-109	WBGene00003699	II	4430927	4430938	4.59e-05	-2466	-2466
I	9699545	9699546	C04F12.8	2.38059	0.000331236	0.014675	-		WBGene00007302	I	9700922	9700933	5.24e-05	1377	-1377
X	10890460	10890461	F47B10.5	2.38035	6.01203e-05	0.00723522	-		WBGene00009816	X	10894819	10894830	3.02e-05	4359	-4359
V	8964076	8964077	T19A5.4	2.38024	0.000210682	0.0115977	-	nhr-44	WBGene00003634	V	8961341	8961352	3.39e-05	-2725	2725
I	9132531	9132532	ZK858.4	2.3719	0.000153792	0.0103407	+	mel-26	WBGene00003209	I	9131779	9131790	1.12e-05	-742	-742
X	6272039	6272040	W05H9.1	2.37013	7.12567e-06	0.00329225	+		WBGene00021048	X	6270537	6270548	7.23e-05	-1492	-1492
V	11446634	11446635	F57B7.4	2.36407	0.00322111	0.0416973	+	mig-17	WBGene00003248	V	11450684	11450695	4.96e-05	4050	4050
V	9173000	9173001	B0222.9	2.36385	5.26262e-06	0.00258841	-		WBGene00015057	V	9170693	9170704	3.86e-05	-2297	2297
IV	10904335	10904336	ZK596.3	2.36063	0.000198671	0.0112374	-		WBGene00014008	IV	10907657	10907668	7.4e-05	3322	-3322
I	10806911	10806912	C35E7.9	2.35597	0.00434675	0.0488372	+		WBGene00016461	I	10811163	10811174	8.27e-05	4252	4252
II	8008568	8008569	DH11.1	2.35383	0.00177192	0.0308857	+	DH11.1	WBGene00008435	II	8003797	8003808	7.18e-05	-4761	-4761
III	3719654	3719655	C14B1.8	2.35283	0.000227862	0.0119062	-		WBGene00007579	III	3720428	3720439	5.85e-05	774	-774
X	9837980	9837981	F47A4.5	2.35072	3.50441e-05	0.0059669	-		WBGene00009801	X	9839426	9839437	5.45e-05	1446	-1446
II	6324452	6324453	C32D5.2	2.34435	0.000162584	0.0106008	+	sma-6	WBGene00004860	II	6324131	6324142	9.06e-05	-311	-311
I	3338369	3338370	Y44E3A.1	2.34103	0.000820214	0.0215906	+		WBGene00021547	I	3336561	3336572	2.2e-05	-1798	-1798
IV	4562562	4562563	F28E10.2	2.33734	0.00132224	0.0267822	+		WBGene00017901	IV	4566100	4566111	2.48e-07	3538	3538
II	4608367	4608368	F35D11.3	2.32879	0.000420833	0.0161938	+		WBGene00018044	II	4603738	4603749	2.24e-05	-4619	-4619
X	4265858	4265859	C52B9.3	2.32351	3.68919e-05	0.00611421	+		WBGene00016866	X	4265454	4265465	5.85e-05	-394	-394
V	10248880	10248881	C12D8.10	2.32307	1.17966e-05	0.00402371	+	akt-1	WBGene00000102	V	10250374	10250385	6.81e-05	1494	1494
IV	6093635	6093636	K08B4.6	2.31106	0.000404239	0.0160455	-	cpi-1	WBGene00000535	IV	6098020	6098031	9.37e-05	4385	-4385
V	13565849	13565850	C50B8.1	2.305	3.9577e-05	0.00626175	+		WBGene00008224	V	13565638	13565649	1.3e-05	-201	-201
V	20544160	20544161	Y38H6C.17	2.30378	0.000152108	0.0103407	-		WBGene00012629	V	20543885	20543896	5.2e-05	-265	265
X	6809065	6809066	M03A8.2	2.29996	8.1803e-05	0.00827413	+		WBGene00019748	X	6808848	6808859	3.83e-05	-207	-207
X	8761527	8761528	M02D8.5	2.29896	0.00108193	0.0244297	-		WBGene00019731	X	8762856	8762867	3.41e-05	1329	-1329
IV	8773181	8773182	F20C5.6	2.29333	0.00058553	0.0188176	-		WBGene00008971	IV	8768546	8768557	6.79e-05	-4625	4625
IV	4821122	4821123	H06H21.8	2.2922	0.000571012	0.0186424	-		WBGene00019164	IV	4821932	4821943	4.55e-05	810	-810
V	13627559	13627560	F53F4.14	2.28635	0.00129903	0.0264542	+		WBGene00009996	V	13628516	13628527	7.68e-05	957	957
X	8231879	8231880	K02A6.3	2.27939	5.17852e-05	0.00670032	-		WBGene00019294	X	8234060	8234071	2.71e-05	2181	-2181
III	8308419	8308420	F10E9.4	2.27777	0.00115383	0.0249402	+		WBGene00017356	III	8307694	8307705	3.99e-05	-715	-715
II	5884527	5884528	F55C12.1	2.26363	0.000185988	0.0110774	+		WBGene00018869	II	5883972	5883983	9.14e-05	-545	-545
I	5810006	5810007	C32F10.4	2.25584	0.000209859	0.0115806	-		WBGene00016332	I	5809003	5809014	8.87e-05	-993	993
III	9103904	9103905	ZK507.4	2.24852	1.05093e-05	0.00402371	+		WBGene00013980	III	9104702	9104713	5.45e-05	798	798
III	8628488	8628489	F22B7.6	2.24839	3.50761e-05	0.0059669	-	polk-1	WBGene00017696	III	8626868	8626879	3.39e-05	-1610	1610
X	16367157	16367158	W09B12.1	2.24768	7.60474e-05	0.00818081	+	ace-1	WBGene00000035	X	16365261	16365272	5.45e-05	-1886	-1886
V	11119688	11119689	H19N07.3	2.24626	8.13485e-05	0.00827413	-		WBGene00010407	V	11122371	11122382	2.56e-05	2683	-2683
I	6294898	6294899	C10G11.5	2.2417	0.000537354	0.0181457	+	pnk-1	WBGene00004068	I	6295094	6295105	3.82e-06	196	196
V	16075300	16075301	F14H3.12	2.23892	0.00252227	0.0374636	-		WBGene00008831	V	16072151	16072162	7.4e-05	-3139	3139
II	11814044	11814045	F43G6.8	2.23744	0.000222341	0.0117809	-		WBGene00009660	II	11816153	11816164	5.61e-05	2109	-2109
I	11675932	11675933	F11A6.1	2.23329	0.000365557	0.0153731	+	kpc-1	WBGene00002232	I	11676155	11676166	4.52e-06	223	223
V	12013585	12013586	F57F5.4	2.23007	0.000194061	0.011137	-	add-2	WBGene00000073	V	12011815	12011826	4.44e-05	-1760	1760
V	16219589	16219590	F11A5.10	2.22564	0.00436807	0.0489973	+	glc-1	WBGene00001591	V	16221908	16221919	2.48e-07	2319	2319
X	8931187	8931188	D1009.1	2.22555	9.68103e-05	0.00873778	+		WBGene00017012	X	8932538	8932549	5.05e-05	1351	1351
V	12810053	12810054	ZC443.1	2.22507	0.0036107	0.0442988	-		WBGene00013896	V	12814418	12814429	8.27e-05	4365	-4365
I	10562957	10562958	F25H2.8	2.22453	2.47986e-05	0.0049652	+	ubc-25	WBGene00006720	I	10560569	10560580	4.53e-05	-2378	-2378
II	6303481	6303482	C29F5.1	2.22406	0.000130191	0.00975579	+		WBGene00016210	II	6304204	6304215	9.71e-05	723	723
V	10084017	10084018	R04B5.4	2.2236	2.0445e-05	0.00481842	-	nhr-12	WBGene00003611	V	10088860	10088871	4.87e-05	4843	-4843
V	13305155	13305156	C26E1.2	2.22317	0.000139607	0.00997705	+		WBGene00007748	V	13308272	13308283	6.29e-05	3117	3117
III	4468847	4468848	F56F3.4	2.22076	0.00152326	0.0285296	+		WBGene00010155	III	4469933	4469944	7.98e-05	1086	1086
I	9715222	9715223	C16C2.4	2.21923	0.000188816	0.0110774	-		WBGene00007621	I	9710431	9710442	5.27e-05	-4781	4781
V	8076065	8076066	C09H5.2	2.20988	0.000838211	0.0216771	+		WBGene00015660	V	8077355	8077366	5.24e-05	1290	1290
II	7724850	7724851	B0228.4	2.20983	0.0037662	0.0453246	+	tag-308	WBGene00015061	II	7723577	7723588	6.21e-05	-1263	-1263
V	17899802	17899803	C06H5.2	2.2018	0.000225706	0.0118758	+	fbxa-157	WBGene00007393	V	17899282	17899293	4.48e-05	-510	-510
III	5816159	5816160	R12B2.1	2.1968	1.68241e-05	0.0047962	+	sma-4	WBGene00004858	III	5819762	5819773	3.87e-05	3603	3603
II	11152541	11152542	F40F8.7	2.19375	7.81653e-05	0.00819491	-	pqm-1	WBGene00004096	II	11151139	11151150	5.81e-05	-1392	1392
V	11201887	11201888	K10D6.4	2.19044	0.000303339	0.0140925	+		WBGene00010744	V	11204178	11204189	9.92e-05	2291	2291
I	11675932	11675933	F11A6.1	2.18836	0.000365557	0.0153731	+	kpc-1	WBGene00002232	I	11676155	11676166	4.52e-06	223	223
II	6661533	6661534	T19D12.2	2.17942	0.00011293	0.00906801	+		WBGene00020577	II	6657159	6657170	9.92e-05	-4364	-4364
I	8288118	8288119	T01G9.2	2.1749	3.76372e-05	0.00611421	-		WBGene00011344	I	8289979	8289990	4.55e-05	1861	-1861
I	3662161	3662162	T28F2.7	2.17469	0.000379083	0.015651	-		WBGene00020903	I	3666934	3666945	4.68e-06	4773	-4773
I	5801301	5801302	B0414.7	2.17396	0.0036918	0.0449281	-	mtk-1	WBGene00003472	I	5801672	5801683	2.81e-05	371	-371
V	3950012	3950013	T09H2.1	2.17291	0.000229091	0.0119373	+	cyp-34A4	WBGene00020386	V	3951872	3951883	3.06e-05	1860	1860
X	5805888	5805889	F13D11.3	2.17081	0.00106714	0.0241933	-		WBGene00017428	X	5806231	5806242	3.97e-05	343	-343
II	6323046	6323047	C32D5.4	2.16015	0.000857008	0.0218476	-		WBGene00016312	II	6324129	6324140	4.47e-05	1083	-1083
III	8992148	8992149	R08D7.7	2.15633	0.000508375	0.0177129	+		WBGene00011147	III	8987208	8987219	8.76e-05	-4930	-4930
III	6608351	6608352	F20H11.4	2.15121	0.000999961	0.0235254	+		WBGene00017647	III	6605743	6605754	3.43e-06	-2598	-2598
V	13259277	13259278	C34D1.4	2.14122	0.000200084	0.011261	-		WBGene00007931	V	13261283	13261294	9.28e-05	2006	-2006
V	12795288	12795289	ZC455.5	2.13827	2.59091e-05	0.00503162	-	ugt-4	WBGene00013905	V	12794714	12794725	2.47e-05	-564	564
III	1315209	1315210	Y82E9BL.14	2.13638	4.25892e-05	0.00633951	-	fbxa-80	WBGene00022330	III	1315279	1315290	6.31e-05	70	-70
V	17896777	17896778	C06H5.1	2.13536	4.88426e-05	0.0065846	-	fbxa-156	WBGene00007392	V	17897178	17897189	4.48e-05	401	-401
V	5019209	5019210	K11D12.3	2.129	0.00372834	0.0450434	+	srr-4	WBGene00005655	V	5018895	5018906	7.1e-05	-304	-304
V	17376711	17376712	Y20C6A.1	2.12894	9.66111e-05	0.00873778	-		WBGene00012491	V	17375643	17375654	4.68e-06	-1058	1058
I	10562957	10562958	F25H2.8	2.1284	2.47986e-05	0.0049652	+	ubc-25	WBGene00006720	I	10560569	10560580	4.53e-05	-2378	-2378
I	4792501	4792502	F54D7.4	2.12818	2.27998e-05	0.00485492	-	zig-7	WBGene00006984	I	4792684	4792695	6.66e-06	183	-183
IV	8115754	8115755	F42G8.9	2.12464	0.000959262	0.0230444	+		WBGene00018360	IV	8112816	8112827	6.21e-05	-2928	-2928
V	12345899	12345900	F23H12.1	2.11991	0.000624302	0.0194004	-	snb-2	WBGene00004898	V	12343719	12343730	7.6e-05	-2170	2170
IV	2601139	2601140	Y69A2AR.7	2.11956	4.3957e-05	0.00637518	+		WBGene00022078	IV	2601323	2601334	6.06e-05	184	184
V	18083444	18083445	Y59A8B.11	2.11155	0.000102251	0.00889782	-	fbxa-106	WBGene00013348	V	18083487	18083498	1.02e-05	43	-43
III	5684052	5684053	F54E7.7	2.10354	0.000196406	0.011137	-	rcn-1	WBGene00004321	III	5684902	5684913	3.85e-05	850	-850
V	9889815	9889816	C50H2.1	2.10171	7.14777e-06	0.00329225	+	fshr-1	WBGene00008239	V	9889339	9889350	9.13e-07	-466	-466
V	8936375	8936376	H14N18.1	2.09506	0.00144104	0.0278254	+	unc-23	WBGene00006760	V	8934467	8934478	5.06e-06	-1898	-1898
V	9570268	9570269	F25B3.5	2.09371	0.000705064	0.0204252	-		WBGene00009102	V	9570015	9570026	6.33e-05	-243	243
V	9112768	9112769	F21C10.7	2.09347	0.000171849	0.0107406	+		WBGene00017657	V	9114807	9114818	9.82e-05	2039	2039
V	12704365	12704366	R11D1.1	2.08652	0.000130221	0.00975579	+		WBGene00011242	V	12707435	12707446	4.07e-05	3070	3070
IV	2596332	2596333	Y69A2AR.8	2.08175	0.000863823	0.0219843	+		WBGene00022079	IV	2595333	2595344	8.82e-05	-989	-989
V	12263983	12263984	F55C5.2	2.07973	0.00284029	0.0393736	+		WBGene00010092	V	12263501	12263512	7.03e-05	-472	-472
V	2565683	2565684	Y45G12C.1	2.0766	0.00257691	0.0379574	+		WBGene00021565	V	2564134	2564145	3.82e-06	-1539	-1539
V	8184298	8184299	F20D6.3	2.07419	1.32463e-05	0.00431515	+	srp-8	WBGene00005649	V	8182748	8182759	7.52e-05	-1540	-1540
I	7968681	7968682	T22C1.11	2.07299	0.000850092	0.0217572	-		WBGene00011920	I	7968898	7968909	2.93e-05	217	-217
X	8718921	8718922	F53A9.8	2.0677	0.00073778	0.0206226	-		WBGene00018731	X	8721354	8721365	8.95e-06	2433	-2433
V	18560277	18560278	Y51A2D.11	2.06323	0.00408382	0.0472238	-	ttr-26	WBGene00013079	V	18561245	18561256	5.34e-05	968	-968
III	8628488	8628489	F22B7.6	2.06314	3.50761e-05	0.0059669	-	polk-1	WBGene00017696	III	8626868	8626879	3.39e-05	-1610	1610
IV	5364259	5364260	F41H10.6	2.05731	0.00187635	0.0317282	-		WBGene00018319	IV	5361344	5361355	6.84e-06	-2905	2905
V	11496354	11496355	T11F9.12	2.04696	0.00119639	0.0254142	-		WBGene00011713	V	11495142	11495153	5.87e-05	-1202	1202
I	6188161	6188162	T05E7.3	2.0413	0.000152539	0.0103407	+		WBGene00020259	I	6188694	6188705	1.97e-06	533	533
V	8460397	8460398	T23B12.6	2.03634	4.91844e-05	0.0065846	-		WBGene00020721	V	8462545	8462556	2.97e-05	2148	-2148
IV	8612379	8612380	F42A9.5	2.03603	0.00146731	0.0280628	+	cyp-33E2	WBGene00018334	IV	8609257	8609268	4.05e-05	-3112	-3112
III	3519593	3519594	M01F1.5	2.03185	0.000112522	0.00906801	-	hmit-1.3	WBGene00010811	III	3523174	3523185	1.83e-05	3581	-3581
V	19014608	19014609	Y39B6A.30	2.03173	0.00159994	0.0292578	+		WBGene00012689	V	19014472	19014483	4.99e-05	-126	-126
V	12904081	12904082	R90.2	2.031	0.00311408	0.0411484	-	ttr-27	WBGene00011284	V	12905675	12905686	9e-05	1594	-1594
IV	16736231	16736232	Y51H4A.25	2.02944	0.000586376	0.0188181	+		WBGene00013119	IV	16737393	16737404	9.97e-05	1162	1162
V	12084296	12084297	R07B7.8	2.02572	0.00213806	0.0342347	-		WBGene00011092	V	12081137	12081148	2.09e-05	-3149	3149
V	14316608	14316609	F47B8.2	2.02536	0.000439355	0.0165674	-		WBGene00009803	V	14315815	14315826	5.65e-05	-783	783
I	12232680	12232681	F14B6.6	2.02098	0.0014872	0.0282518	+		WBGene00008787	I	12233970	12233981	4.35e-05	1290	1290
V	9112768	9112769	F21C10.7	2.01492	0.000171849	0.0107406	+		WBGene00017657	V	9114807	9114818	9.82e-05	2039	2039
X	1054211	1054212	K03E6.3	2.01152	0.00043545	0.0165026	+	ncs-3	WBGene00003565	X	1054783	1054794	4.99e-05	572	572
IV	8773181	8773182	F20C5.6	2.01012	0.00058553	0.0188176	-		WBGene00008971	IV	8768546	8768557	6.79e-05	-4625	4625
II	5873591	5873592	F55C12.5	2.00629	9.04533e-05	0.00860555	-		WBGene00018872	II	5873009	5873020	3.8e-05	-572	572
X	2118250	2118251	F53B1.6	2.0057	0.000288347	0.0137344	-		WBGene00018738	X	2118923	2118934	4.52e-06	673	-673
III	5573954	5573955	F09F7.1	-2.01592	1.97086e-05	0.0047962	+		WBGene00017299	III	5573999	5574010	5.71e-05	45	45
X	1479535	1479536	D1005.1	-2.03583	0.00153961	0.0287643	+		WBGene00016995	X	1480070	1480081	3.29e-06	535	535
V	13756397	13756398	F20G2.2	-2.03664	0.000108918	0.00902667	-		WBGene00008986	V	13757149	13757160	6.97e-05	752	-752
I	12968910	12968911	C47B2.5	-2.03679	0.000312439	0.0142806	+	eif-6	WBGene00001234	I	12968249	12968260	8.15e-06	-651	-651
IV	17186874	17186875	C52D10.1	-2.05621	0.000809596	0.0214738	+		WBGene00016875	IV	17183731	17183742	6.79e-05	-3133	-3133
II	13957448	13957449	W07G1.3	-2.06766	3.05335e-05	0.00557114	-	zip-3	WBGene00012330	II	13955504	13955515	2.2e-05	-1934	1934
IV	9159003	9159004	F23B2.11	-2.07599	0.000239059	0.0122093	-	pcp-3	WBGene00003958	IV	9158387	9158398	2.45e-05	-606	606
X	14320327	14320328	C11H1.9	-2.08869	0.000132909	0.00981783	-		WBGene00023500	X	14320030	14320041	1.79e-06	-287	287
I	9357070	9357071	M04C9.4	-2.09762	0.000131663	0.00979895	-		WBGene00010859	I	9359837	9359848	6.72e-05	2767	-2767
V	18492237	18492238	Y51A2D.19	-2.10796	0.000383135	0.0157608	+	slo-1	WBGene00004830	V	18492543	18492554	3.23e-05	306	306
III	10267289	10267290	R01H10.7	-2.12803	0.000133554	0.00981783	-		WBGene00010975	III	10266120	10266131	5.02e-05	-1159	1159
V	19047018	19047019	Y39B6A.21	-2.14791	2.17259e-05	0.0048191	+		WBGene00012680	V	19047787	19047798	3.02e-05	769	769
IV	1012652	1012653	Y55F3AM.3	-2.23042	4.66003e-05	0.00650822	+		WBGene00021921	IV	1011527	1011538	2.38e-05	-1115	-1115
II	12627121	12627122	Y38E10A.15	-2.24117	0.00101166	0.0236211	+		WBGene00012593	II	12626820	12626831	3.2e-07	-291	-291
V	19697367	19697368	Y43F8C.13	-2.26651	0.000237501	0.0121847	-		WBGene00012834	V	19697653	19697664	5.67e-05	286	-286
III	542064	542065	T22F7.1	-2.28968	8.12575e-05	0.00827413	+		WBGene00020701	III	541044	541055	9.16e-05	-1010	-1010
V	4826745	4826746	C37H5.8	-2.32392	0.00409328	0.0472238	-	hsp-6	WBGene00002010	V	4825392	4825403	8.59e-06	-1343	1343
II	237820	237821	Y43H11AL.2	-2.38676	0.000105516	0.00894117	-		WBGene00021546	II	238041	238052	1.23e-06	221	-221
II	12919508	12919509	F58G1.1	-2.38747	0.00281682	0.0392913	+		WBGene00010263	II	12919765	12919776	9.55e-05	257	257
X	13841542	13841543	M03B6.1	-2.39089	3.14276e-05	0.00568839	+		WBGene00010833	X	13836877	13836888	5.45e-05	-4655	-4655
V	9737567	9737568	F40F9.9	-2.39273	0.00122483	0.0256116	+	aqp-4	WBGene00000172	V	9741078	9741089	9.52e-05	3511	3511
V	16339004	16339005	F57G8.5	-2.39907	0.000124601	0.00953942	+		WBGene00010214	V	16335962	16335973	9.6e-05	-3032	-3032
III	2418335	2418336	W04B5.3	-2.40312	0.00040194	0.0160225	+		WBGene00021020	III	2418935	2418946	4.68e-06	600	600
X	12762015	12762016	F22E10.5	-2.42991	1.81669e-05	0.0047962	+		WBGene00009057	X	12761381	12761392	4.68e-05	-624	-624
I	3163690	3163691	Y54E10A.6	-2.44872	0.000578163	0.0187616	+		WBGene00021828	I	3160439	3160450	3.34e-05	-3241	-3241
V	11265631	11265632	F07B10.1	-2.45449	3.81306e-05	0.00611421	-	cln-3.1	WBGene00000539	V	11263694	11263705	5.49e-05	-1927	1927
I	7643323	7643324	F26A3.2	-2.48063	0.00271411	0.0386937	-	ncbp-2	WBGene00009141	I	7642954	7642965	6.33e-08	-359	359
I	12942269	12942270	F08A8.2	-2.48629	0.00254722	0.0376183	+		WBGene00008565	I	12940389	12940400	2.47e-06	-1870	-1870
II	13715801	13715802	Y54G9A.4	-2.49955	0.000268107	0.0131013	-		WBGene00013207	II	13715305	13715316	6.15e-05	-486	486
V	5410978	5410979	F08F3.4	-2.5463	0.00063629	0.0194494	+		WBGene00017262	V	5409110	5409121	6.17e-05	-1858	-1858
I	323352	323353	Y48G1A.5	-2.58208	0.00452033	0.0495748	-	imb-5	WBGene00002079	I	323929	323940	8.69e-06	577	-577
X	3270850	3270851	K09C4.8	-2.63653	0.0001052	0.00894117	-	sul-1	WBGene00006308	X	3275158	3275169	6.11e-05	4308	-4308
IV	13179358	13179359	F09E8.7	-2.65465	1.46888e-06	0.0019574	-	lev-1	WBGene00002974	IV	13178544	13178555	6.84e-05	-804	804
V	281716	281717	Y58G8A.4	-2.66678	0.00129016	0.0264175	-		WBGene00021983	V	280850	280861	4.16e-05	-856	856
V	3772044	3772045	R08E5.3	-2.67716	9.28716e-06	0.00396457	+		WBGene00019963	V	3771671	3771682	2.8e-05	-363	-363
II	14494438	14494439	K10H10.2	-2.71749	0.00087168	0.022088	-		WBGene00010759	II	14491682	14491693	4.84e-05	-2746	2746
IV	7237717	7237718	D2024.3	-2.76378	0.000164524	0.0106098	+	elo-3	WBGene00001241	IV	7236261	7236272	9.92e-05	-1446	-1446
IV	4530319	4530320	ZK185.3	-2.77613	2.98498e-05	0.00549067	-		WBGene00022683	IV	4530002	4530013	1.17e-05	-307	307
IV	17186874	17186875	C52D10.1	-2.79363	0.000809596	0.0214738	+		WBGene00016875	IV	17183731	17183742	6.79e-05	-3133	-3133
X	16770426	16770427	C10E2.6	-2.81708	0.00342101	0.0429763	-		WBGene00015676	X	16768299	16768310	9.11e-05	-2117	2117
II	9161318	9161319	W07A12.7	-2.85676	0.000282366	0.013535	+	rhy-1	WBGene00012324	II	9159673	9159684	9.68e-06	-1635	-1635
III	9138623	9138624	ZK512.7	-2.88072	0.00278567	0.0391464	-		WBGene00013986	III	9138960	9138971	5.42e-05	337	-337
V	6524972	6524973	F46E10.1	-2.94181	0.00074435	0.0207027	+		WBGene00018488	V	6528754	6528765	8.74e-05	3782	3782
V	3776121	3776122	R08E5.2	-3.00769	1.97148e-05	0.0047962	-		WBGene00019962	V	3775719	3775730	9.28e-05	-392	392
X	1148339	1148340	R193.2	-3.07966	0.000448443	0.0167426	-		WBGene00020128	X	1148976	1148987	9.14e-05	637	-637
IV	17467377	17467378	F11E6.5	-3.12182	5.73093e-05	0.00709118	-	elo-2	WBGene00001240	IV	17465184	17465195	6.97e-05	-2183	2183
IV	12599145	12599146	K08E7.9	-3.17853	0.00311546	0.0411484	-	pgp-1	WBGene00003995	IV	12601835	12601846	5.82e-05	2690	-2690
X	14515010	14515011	D1025.2	-3.26514	0.000242398	0.012269	-		WBGene00008354	X	14512831	14512842	4.52e-06	-2169	2169
V	4617933	4617934	F54D11.2	-3.43087	0.000382621	0.0157608	+		WBGene00018812	V	4613091	4613102	8.84e-05	-4832	-4832
V	8017927	8017928	F43H9.2	-3.5462	0.000101184	0.00889408	+	sptl-2	WBGene00018398	V	8016481	8016492	7.52e-05	-1436	-1436
V	6524972	6524973	F46E10.1	-3.59528	0.00074435	0.0207027	+		WBGene00018488	V	6528754	6528765	8.74e-05	3782	3782
II	12620818	12620819	Y38E10A.13	-3.71777	0.00103089	0.0237999	-		WBGene00012591	II	12622309	12622320	5.59e-05	1491	-1491
X	7305524	7305525	K03A1.5	-3.73951	0.000104297	0.00894117	-	sur-5	WBGene00006351	X	7309272	7309283	1.56e-07	3748	-3748
III	9138623	9138624	ZK512.7	-3.7577	0.00278567	0.0391464	-		WBGene00013986	III	9138960	9138971	5.42e-05	337	-337
V	8768887	8768888	B0507.3	-4.21969	1.9677e-05	0.0047962	+		WBGene00015220	V	8767586	8767597	9.16e-05	-1291	-1291
X	7305524	7305525	K03A1.5	-4.40769	0.000104297	0.00894117	-	sur-5	WBGene00006351	X	7309272	7309283	1.56e-07	3748	-3748
X	978441	978442	C44C1.5	-4.79619	0.000144529	0.0101552	-		WBGene00016644	X	979485	979496	1.09e-05	1044	-1044
II	13585657	13585658	Y48E1B.8	-7.12549	4.16833e-06	0.00242182	+		WBGene00013007	II	13590248	13590259	2.2e-05	4591	4591
III	9324965	9324966	C40H1.7	-7.61937	0.00160915	0.0293132	+		WBGene00008042	III	9326130	9326141	5.68e-07	1165	1165
X	3282599	3282600	K09C4.5	-10.6665	4.28165e-06	0.00242182	+		WBGene00019550	X	3285304	3285315	1.67e-05	2705	2705
